# Supplementary material
Source: publisher figshare collection journal article supplement (https://tandf.figshare.com/articles/dataset/_/6213614)
Supplement: Supplementary file 1 [file 3]

STable 1. qPCR primer pairs

| CG#     | Gene name | Forward primer (5' to 3') | Reverse primer (5' to 3') |
|---------|-----------|---------------------------|---------------------------|
| CG10320 | ND-B12    | GGATTCTGCGCTTTCCT         | GCGATAGCACAATGGGTTTA      |
| CG11115 | Ssl1      | GCTAAGCGAGCGGAGAA         | GATAATGACGATCTCTCGGG      |
| CG13630 | CG13630   | TATTGCGGTCATGGCATTG       | CCAGGTTTCAGCCTTCT         |
| CG2128  | HDAC3     | TCACAGCCTGGTAATGAACT      | GTATAGGCCACGGAATTGC       |
| CG2259  | GCLC      | ATAGCGATCACACCGAC         | TCAATGGTGCAATGCGTA        |
| CG4173  | Sep2      | GAGAACGAGACGCACTG         | GCTGTCCACATCGCTGA         |
| CG4561  | TyrRs     | GGAGTACCTCAAGGTGGAC       | CCTCGGAAGAGGACATC         |
| CG7340  | grsm      | GACATGGGAGGCAAAGT         | GGATTGGGCGTTCTGAC         |
| CG7393  | p38b      | ATCATGGAAGTGCTGGG         | CAGCATCTTCTCCAGCAA        |
| CG8392  | prosb1    | TCATTTTCGTGTTCTGTGCG      | CTCCAATGACCACTCCG         |
| CG9900  | ZW10      | CCACGCTGCATGATCTC         | CCTTGGGCACCTCATTG         |
| CG9755  | pum       | GCAGCAGGGTGCCGAGAATC      | CGCGGCGACCCGTCAACG        |
| CG4027  | Actin5C   | CTTCTACAATGAGCTGCGT       | GAGAGCACAGCCTGGAT         |
