# Supplementary material
Source: publisher figshare collection journal article supplement (https://tandf.figshare.com/articles/dataset/_/6213614)
Supplement: Supplementary file 3 [file 3]

STable 3. gene category analysis of 1166 *dpum* regulators

Please note that only data colored in grey is considered statistically significant

Of these 1166 genes, 988 were assigned ro gene identifiers recognised by the DAVID tool.

Functional Annotation Clustering

| Annotation Cluster 1    Enrichment Score: 8.113424315169704 |                                                                     |       |       |          |              |            |          |       |        |           |            |               |
|-------------------------------------------------------------|---------------------------------------------------------------------|-------|-------|----------|--------------|------------|----------|-------|--------|-----------|------------|---------------|
| Category                                                    | Term                                                                | Count | %     | PValue   | Genes        | List Total | Pop Hits | Pop   | Tota   | Fold Enri | Bonferroni | Benjamini FDR |
| GOTERM_BP_DIRECT                                            | GO:0006367~transcription initiation from RNA polymerase II promoter | 25    | 2.53  | 1.91E-12 | FBGN0000617, | 764        | 64       | 10996 | 5.6221 | 2.67E-09  | 1.34E-09   | 3.15E-09      |
| GOTERM_BP_DIRECT                                            | GO:0006357~regulation of transcription from RNA polymerase II prom  | 41    | 4.15  | 7.23E-12 | FBGN0024330, | 764        | 173      | 10996 | 3.411  | 1.01E-08  | 3.37E-09   | 1.19E-08      |
| GOTERM_CC_DIRECT                                            | GO:0016592~mediator complex                                         | 17    | 1.721 | 2.99E-10 | FBGN0024330, | 753        | 33       | 10026 | 6.8591 | 1.22E-07  | 6.12E-08   | 4.18E-07      |
| GOTERM_MF_DIRECT                                            | GO:0001104~RNA polymerase II transcription cofactor activity        | 17    | 1.721 | 3.35E-10 | FBGN0024330, | 677        | 34       | 9284  | 6.8567 | 1.77E-07  | 1.77E-07   | 4.86E-07      |
| GOTERM_BP_DIRECT                                            | GO:0007406~negative regulation of neuroblast proliferation          | 9     | 0.911 | 3.51E-04 | FBGN0032833, | 764        | 27       | 10996 | 4.7976 | 0.3880274 | 0.02847    | 0.577         |
| GOTERM_CC_DIRECT                                            | GO:0070847~core mediator complex                                    | 6     | 0.607 | 4.29E-04 | FBGN0024330, | 753        | 10       | 10026 | 7.9888 | 0.1614252 | 0.01167    | 0.59927       |

| Annotation Cluster 2    Enrichment Score: 4.836687716120325 |                                                                   |       |       |           |              |            |          |       |        |           |            |               |
|-------------------------------------------------------------|-------------------------------------------------------------------|-------|-------|-----------|--------------|------------|----------|-------|--------|-----------|------------|---------------|
| Category                                                    | Term                                                              | Count | %     | PValue    | Genes        | List Total | Pop Hits | Pop   | Tota   | Fold Enri | Bonferroni | Benjamini FDR |
| GOTERM_CC_DIRECT                                            | GO:0000502--proteasome complex                                    | 16    | 1.619 | 2.42E-07  | FBGN0050382, | 753        | 43       | 10026 | 4.9543 | 9.91E-05  | 2.48E-05   | 3.38E-04      |
| GOTERM_CC_DIRECT                                            | GO:0005839--proteasome core complex                               | 10    | 1.012 | 1.01E-06  | FBGN0050382, | 753        | 17       | 10026 | 7.8322 | 4.13E-04  | 6.88E-05   | 0.00141       |
| GOTERM_BP_DIRECT                                            | GO:0043161--proteasome-mediated ubiquitin-dependent protein catat | 20    | 2.024 | 7.19E-06  | FBGN0050382, | 764        | 88       | 10996 | 3.2711 | 0.0099988 | 0.00112    | 0.01184       |
| GOTERM_MF_DIRECT                                            | GO:0004298--threonine-type endopeptidase activity                 | 11    | 1.113 | 1.06E-05  | FBGN0050382, | 677        | 27       | 9284  | 5.587  | 0.0055667 | 0.00112    | 0.01537       |
| GOTERM_MF_DIRECT                                            | GO:0004175--endopeptidase activity                                | 13    | 1.316 | 2.91E-05  | FBGN0037022, | 677        | 42       | 9284  | 4.2446 | 0.0152376 | 0.00256    | 0.04226       |
| GOTERM_CC_DIRECT                                            | GO:0019774--proteasome core complex, beta-subunit complex         | 4     | 0.405 | 0.0176857 | FBGN0026380, | 753        | 8        | 10026 | 6.6574 | 0.9993352 | 0.22297    | 22.103        |

| Annotation Cluster 3    Enrichment Score: 4.136060022912842 |                                                |       |       |           |              |            |          |       |        |           |            |               |
|-------------------------------------------------------------|------------------------------------------------|-------|-------|-----------|--------------|------------|----------|-------|--------|-----------|------------|---------------|
| Category                                                    | Term                                           | Count | %     | PValue    | Genes        | List Total | Pop Hits | Pop   | Tota   | Fold Enri | Bonferroni | Benjamini FDR |
| GOTERM_CC_DIRECT                                            | GO:0005704~polytene chromosome band            | 13    | 1.316 | 2.88E-07  | FBGN0039169, | 753        | 28       | 10026 | 6.1818 | 1.18E-04  | 2.36E-05   | 4.03E-04      |
| GOTERM_BP_DIRECT                                            | GO:0007526~larval somatic muscle development   | 16    | 1.619 | 1.09E-06  | FBGN0030855, | 764        | 51       | 10996 | 4.5153 | 0.0015285 | 2.18E-04   | 0.0018        |
| GOTERM_CC_DIRECT                                            | GO:0000788~nuclear nucleosome                  | 18    | 1.822 | 5.98E-06  | FBGN0053812, | 753        | 67       | 10026 | 3.5771 | 0.0024503 | 2.73E-04   | 0.00838       |
| GOTERM_BP_DIRECT                                            | GO:0006334~nucleosome assembly                 | 24    | 2.429 | 2.08E-05  | FBGN0034975, | 764        | 128      | 10996 | 2.6986 | 0.0286025 | 0.00263    | 0.03419       |
| GOTERM_CC_DIRECT                                            | GO:0000790~nuclear chromatin                   | 19    | 1.923 | 4.64E-05  | FBGN0037751, | 753        | 85       | 10026 | 2.9762 | 0.0188264 | 0.00173    | 0.06487       |
| GOTERM_BP_DIRECT                                            | GO:0006325~chromatin organization              | 15    | 1.518 | 5.59E-05  | FBGN0029094, | 764        | 61       | 10996 | 3.5392 | 0.075222  | 0.006      | 0.09211       |
| GOTERM_CC_DIRECT                                            | GO:0005694~chromosome                          | 17    | 1.721 | 7.47E-04  | FBGN0010278, | 753        | 88       | 10026 | 2.5722 | 0.2639168 | 0.01786    | 1.0407        |
| GOTERM_CC_DIRECT                                            | GO:0000786~nucleosome                          | 20    | 2.024 | 0.0010629 | FBGN0034975, | 753        | 117      | 10026 | 2.276  | 0.3533954 | 0.02393    | 1.47763       |
| GOTERM_MF_DIRECT                                            | GO:0046982~protein heterodimerization activity | 30    | 3.036 | 0.0020731 | FBGN0000370, | 677        | 227      | 9284  | 1.8123 | 0.6650023 | 0.08711    | 2.96561       |
| GOTERM_BP_DIRECT                                            | GO:0006342~chromatin silencing                 | 17    | 1.721 | 0.0261004 | FBGN0003732, | 764        | 136      | 10996 | 1.7991 | 1         | 0.52978    | 35.3178       |

| Annotation Cluster 4    Enrichment Score: 4.012981884441554 |                                                                 |       |       |          |              |            |          |       |        |           |            |               |
|-------------------------------------------------------------|-----------------------------------------------------------------|-------|-------|----------|--------------|------------|----------|-------|--------|-----------|------------|---------------|
| Category                                                    | Term                                                            | Count | %     | PValue   | Genes        | List Total | Pop Hits | Pop   | Tota   | Fold Enri | Bonferroni | Benjamini FDR |
| GOTERM_BP_DIRECT                                            | GO:0035195~gene silencing by miRNA                              | 8     | 0.81  | 4.95E-05 | FBGN0033062, | 764        | 16       | 10996 | 7.1963 | 0.066861  | 0.00575    | 0.08151       |
| GOTERM_BP_DIRECT                                            | GO:0000184~nuclear-transcribed mRNA catabolic process, nonsense | 8     | 0.81  | 7.91E-05 | FBGN0033378, | 764        | 17       | 10996 | 6.773  | 0.1047253 | 0.00787    | 0.13027       |
| GOTERM_BP_DIRECT                                            | GO:0016246~RNA interference                                     | 10    | 1.012 | 2.33E-04 | FBGN0033062, | 764        | 32       | 10996 | 4.4977 | 0.2784505 | 0.02019    | 0.38383       |

| Annotation Cluster 5    Enrichment Score: 2.9487415014398084 |                                                            |       |       |           |              |            |          |       |        |           |            |               |
|--------------------------------------------------------------|------------------------------------------------------------|-------|-------|-----------|--------------|------------|----------|-------|--------|-----------|------------|---------------|
| Category                                                     | Term                                                       | Count | %     | PValue    | Genes        | List Total | Pop Hits | Pop   | Tota   | Fold Enri | Bonferroni | Benjamini FDR |
| GOTERM_CC_DIRECT                                             | GO:0005665--DNA-directed RNA polymerase II, core complex   | 8     | 0.81  | 4.90E-05  | FBGN0004855, | 753        | 15       | 10026 | 7.1012 | 0.0198841 | 0.00167    | 0.06855       |
| GOTERM_MF_DIRECT                                             | GO:0003899--DNA-directed RNA polymerase activity           | 10    | 1.012 | 1.07E-04  | FBGN0004855, | 677        | 28       | 9284  | 4.8977 | 0.0547643 | 0.00801    | 0.15492       |
| GOTERM_BP_DIRECT                                             | GO:0006360--transcription from RNA polymerase I promoter   | 6     | 0.607 | 0.0012774 | FBGN0033929, | 764        | 13       | 10996 | 6.6428 | 0.8325404 | 0.08158    | 2.08377       |
| GOTERM_BP_DIRECT                                             | GO:0006383--transcription from RNA polymerase III promoter | 6     | 0.607 | 0.0026527 | FBGN0037121, | 764        | 15       | 10996 | 5.7571 | 0.9756072 | 0.13803    | 4.28153       |
| GOTERM_CC_DIRECT                                             | GO:0005666--DNA-directed RNA polymerase III complex        | 6     | 0.607 | 0.0088138 | FBGN0037121, | 753        | 18       | 10026 | 4.4382 | 0.9734753 | 0.15209    | 11.6553       |
| GOTERM_CC_DIRECT                                             | GO:0005736--DNA-directed RNA polymerase I complex          | 5     | 0.506 | 0.0129852 | FBGN0037121, | 753        | 13       | 10026 | 5.1211 | 0.9952934 | 0.20784    | 16.7198       |

| Annotation Cluster 6    Enrichment Score: 2.6044976246466724 |                                                                   |       |       |           |              |            |          |       |        |           |            |               |
|--------------------------------------------------------------|-------------------------------------------------------------------|-------|-------|-----------|--------------|------------|----------|-------|--------|-----------|------------|---------------|
| Category                                                     | Term                                                              | Count | %     | PValue    | Genes        | List Total | Pop Hits | Pop   | Tota   | Fold Enri | Bonferroni | Benjamini FDR |
| GOTERM_BP_DIRECT                                             | GO:0006378~mRNA polyadenylation                                   | 8     | 0.81  | 6.91E-04  | FBGN0015949, | 764        | 23       | 10996 | 5.0061 | 0.6193119 | 0.04956    | 1.1316        |
| GOTERM_CC_DIRECT                                             | GO:0005847~mRNA cleavage and polyadenylation specificity factor c | 5     | 0.506 | 0.0045711 | FBGN0027873, | 753        | 10       | 10026 | 6.6574 | 0.8471752 | 0.08557    | 6.21209       |
| GOTERM_BP_DIRECT                                             | GO:0006379~mRNA cleavage                                          | 6     | 0.607 | 0.004867  | FBGN0027873, | 764        | 17       | 10996 | 5.0798 | 0.9989091 | 0.19196    | 7.72291       |

| Annotation Cluster 7    Enrichment Score: 2.369762841850479 |                                                            |       |       |           |              |            |          |       |        |           |            |               |
|-------------------------------------------------------------|------------------------------------------------------------|-------|-------|-----------|--------------|------------|----------|-------|--------|-----------|------------|---------------|
| Category                                                    | Term                                                       | Count | %     | PValue    | Genes        | List Total | Pop Hits | Pop   | Tota   | Fold Enri | Bonferroni | Benjamini FDR |
| GOTERM_BP_DIRECT                                            | GO:0035195~gene silencing by miRNA                         | 8     | 0.81  | 4.95E-05  | FBGN0033062, | 764        | 16       | 10996 | 7.1963 | 0.066861  | 0.00575    | 0.08151       |
| GOTERM_BP_DIRECT                                            | GO:0045071~negative regulation of viral genome replication | 3     | 0.304 | 0.0262597 | FBGN0033062, | 764        | 4        | 10996 | 10.795 | 1         | 0.52481    | 35.4919       |
| GOTERM_BP_DIRECT                                            | GO:0031053~primary miRNA processing                        | 3     | 0.304 | 0.0598172 | FBGN0033062, | 764        | 6        | 10996 | 7.1963 | 1         | 0.72391    | 63.8003       |

| Annotation Cluster 8    Enrichment Score: 2.2463626594349453 |                                               |       |       |           |              |            |          |       |        |           |            |               |
|--------------------------------------------------------------|-----------------------------------------------|-------|-------|-----------|--------------|------------|----------|-------|--------|-----------|------------|---------------|
| Category                                                     | Term                                          | Count | %     | PValue    | Genes        | List Total | Pop Hits | Pop   | Tota   | Fold Enri | Bonferroni | Benjamini FDR |
| GOTERM_CC_DIRECT                                             | GO:0022625~cytosolic large ribosomal subunit  | 17    | 1.721 | 3.44E-06  | FBGN0086710, | 753        | 58       | 10026 | 3.9026 | 0.001411  | 1.76E-04   | 0.00482       |
| GOTERM_CC_DIRECT                                             | GO:0005840~ribosome                           | 20    | 2.024 | 1.03E-04  | FBGN0086710, | 753        | 98       | 10026 | 2.7173 | 0.0411683 | 0.00323    | 0.14343       |
| GOTERM_BP_DIRECT                                             | GO:0002181~cytoplasmic translation            | 18    | 1.822 | 4.78E-04  | FBGN0086710, | 764        | 100      | 10996 | 2.5907 | 0.4871489 | 0.03642    | 0.7838        |
| GOTERM_CC_DIRECT                                             | GO:0022626~cytosolic ribosome                 | 14    | 1.417 | 0.361353  | FBGN0086710, | 753        | 153      | 10026 | 1.2183 | 1         | 0.94345    | 99.8121       |
| GOTERM_MF_DIRECT                                             | GO:0003735~structural constituent of ribosome | 24    | 2.429 | 0.5520483 | FBGN0086710, | 677        | 319      | 9284  | 1.0317 | 1         | 0.99819    | 99.9991       |
| GOTERM_BP_DIRECT                                             | GO:0006412~translation                        | 30    | 3.036 | 0.9885137 | FBGN0031980, | 764        | 601      | 10996 | 0.7184 | 1         | 1          | 100           |

| Annotation Cluster 9    Enrichment Score: 1.8867645444801537 |                                            |       |       |           |              |            |          |       |        |           |            |               |
|--------------------------------------------------------------|--------------------------------------------|-------|-------|-----------|--------------|------------|----------|-------|--------|-----------|------------|---------------|
| Category                                                     | Term                                       | Count | %     | PValue    | Genes        | List Total | Pop Hits | Pop   | Tota   | Fold Enri | Bonferroni | Benjamini FDR |
| GOTERM_BP_DIRECT                                             | GO:0000398--mRNA splicing, via spliceosome | 28    | 2.834 | 0.0039038 | FBGN0017457, | 764        | 226      | 10996 | 1.7832 | 0.995781  | 0.16663    | 6.24039       |
| GOTERM_CC_DIRECT                                             | GO:0071011--precatalytic spliceosome       | 20    | 2.024 | 0.0166665 | FBGN0016978, | 753        | 150      | 10026 | 1.7753 | 0.9989829 | 0.23282    | 20.964        |
| GOTERM_CC_DIRECT                                             | GO:0071013--catalytic step 2 spliceosome   | 17    | 1.721 | 0.0336029 | FBGN0033378, | 753        | 130      | 10026 | 1.7412 | 0.9999992 | 0.35463    | 38.0266       |

| Annotation Cluster 10    Enrichment Score: 1.7504109536406758 |                                    |       |       |           |              |            |          |       |        |           |            |               |
|---------------------------------------------------------------|------------------------------------|-------|-------|-----------|--------------|------------|----------|-------|--------|-----------|------------|---------------|
| Category                                                      | Term                               | Count | %     | PValue    | Genes        | List Total | Pop Hits | Pop   | Tota   | Fold Enri | Bonferroni | Benjamini FDR |
| GOTERM_BP_DIRECT                                              | GO:0034472~snRNA 3'-end processing | 6     | 0.607 | 0.0018745 | FBGN0031314, | 764        | 14       | 10996 | 6.1683 | 0.9274189 | 0.10778    | 3.04368       |
| GOTERM_CC_DIRECT                                              | GO:0032039~integrator complex      | 5     | 0.506 | 0.0171203 | FBGN0031314, | 753        | 14       | 10026 | 4.7553 | 0.9991583 | 0.23066    | 21.473        |

|                       |                                                                       |       |       |           |              |            |          |           |           |            |               |         |
|-----------------------|-----------------------------------------------------------------------|-------|-------|-----------|--------------|------------|----------|-----------|-----------|------------|---------------|---------|
| GOTERM_BP_DIRECT      | GO:0016180~snRNA processing                                           | 3     | 0.304 | 0.174729  | FBGN0039691, | 764        | 11       | 10996     | 3.9253    | 1          | 0.92621       | 95.773  |
| Annotation Cluster 11 | Enrichment Score: 1.7245142310644581                                  |       |       |           |              |            |          |           |           |            |               |         |
| Category              | Term                                                                  | Count | %     | PValue    | Genes        | List Total | Pop Hits | Pop Total | Fold Enri | Bonferroni | Benjamini FDR |         |
| GOTERM_BP_DIRECT      | GO:0006368~transcription elongation from RNA polymerase II promot     | 7     | 0.709 | 0.0091978 | FBGN0019949, | 764        | 27       | 10996     | 3.7314    | 0.9999975  | 0.30151       | 14.1204 |
| GOTERM_BP_DIRECT      | GO:0016570~histone modification                                       | 5     | 0.506 | 0.0131346 | FBGN0035205, | 764        | 14       | 10996     | 5.1402    | 1          | 0.3629        | 19.5722 |
| GOTERM_CC_DIRECT      | GO:0016593~Cdc73/Paf1 complex                                         | 4     | 0.405 | 0.0555082 | FBGN0035205, | 753        | 12       | 10026     | 4.4382    | 1          | 0.47816       | 55.0407 |
| Annotation Cluster 12 | Enrichment Score: 1.6475724158809963                                  |       |       |           |              |            |          |           |           |            |               |         |
| Category              | Term                                                                  | Count | %     | PValue    | Genes        | List Total | Pop Hits | Pop Total | Fold Enri | Bonferroni | Benjamini FDR |         |
| GOTERM_BP_DIRECT      | GO:0016573~histone acetylation                                        | 10    | 1.012 | 0.012668  | FBGN0034975, | 764        | 55       | 10996     | 2.6168    | 1          | 0.36682       | 18.9435 |
| GOTERM_BP_DIRECT      | GO:0043486~histone exchange                                           | 5     | 0.506 | 0.0264626 | FBGN0000046, | 764        | 17       | 10996     | 4.2331    | 1          | 0.52057       | 35.713  |
| GOTERM_CC_DIRECT      | GO:0035267~NuA4 histone acetyltransferase complex                     | 5     | 0.506 | 0.0340362 | FBGN0000046, | 753        | 17       | 10026     | 3.9161    | 0.9999993  | 0.34136       | 38.4144 |
| Annotation Cluster 13 | Enrichment Score: 1.4873313256014422                                  |       |       |           |              |            |          |           |           |            |               |         |
| Category              | Term                                                                  | Count | %     | PValue    | Genes        | List Total | Pop Hits | Pop Total | Fold Enri | Bonferroni | Benjamini FDR |         |
| GOTERM_CC_DIRECT      | GO:0005675~holo TFIIF complex                                         | 5     | 0.506 | 0.0045711 | FBGN0033929, | 753        | 10       | 10026     | 6.6574    | 0.8471752  | 0.08557       | 6.21209 |
| GOTERM_BP_DIRECT      | GO:0001113~transcriptional open complex formation at RNA polymer      | 4     | 0.405 | 0.0094268 | FBGN0033929, | 764        | 7        | 10996     | 8.2244    | 0.9999982  | 0.30084       | 14.4469 |
| GOTERM_BP_DIRECT      | GO:0001111~promoter clearance from RNA polymerase II promoter         | 4     | 0.405 | 0.0143123 | FBGN0033929, | 764        | 8        | 10996     | 7.1963    | 1          | 0.38111       | 21.1388 |
| GOTERM_MF_DIRECT      | GO:0000990~transcription factor activity, core RNA polymerase bindir  | 4     | 0.405 | 0.0231653 | FBGN0033929, | 677        | 9        | 9284      | 6.0949    | 0.9999957  | 0.51644       | 28.8237 |
| GOTERM_CC_DIRECT      | GO:0000439~core TFIIF complex                                         | 3     | 0.304 | 0.0688246 | FBGN0033929, | 753        | 6        | 10026     | 6.6574    | 1          | 0.5853        | 63.1449 |
| GOTERM_BP_DIRECT      | GO:0006289~nucleotide-excision repair                                 | 4     | 0.405 | 0.1410546 | FBGN0033929, | 764        | 19       | 10996     | 3.03      | 1          | 0.88824       | 91.8311 |
| GOTERM_BP_DIRECT      | GO:0009411~response to UV                                             | 3     | 0.304 | 0.2796486 | FBGN0033929, | 764        | 15       | 10996     | 2.8785    | 1          | 0.97669       | 99.55   |
| Annotation Cluster 14 | Enrichment Score: 1.4742675218646217                                  |       |       |           |              |            |          |           |           |            |               |         |
| Category              | Term                                                                  | Count | %     | PValue    | Genes        | List Total | Pop Hits | Pop Total | Fold Enri | Bonferroni | Benjamini FDR |         |
| GOTERM_CC_DIRECT      | GO:0005838~proteasome regulatory particle                             | 6     | 0.607 | 0.0173644 | FBGN0028684, | 753        | 21       | 10026     | 3.8042    | 0.9992398  | 0.22624       | 21.7456 |
| GOTERM_MF_DIRECT      | GO:0017025~TBP-class protein binding                                  | 5     | 0.506 | 0.019911  | FBGN0036224, | 677        | 15       | 9284      | 4.5711    | 0.9999751  | 0.48441       | 25.3052 |
| GOTERM_BP_DIRECT      | GO:0045899~positive regulation of RNA polymerase II transcriptional   | 4     | 0.405 | 0.0203756 | FBGN0036224, | 764        | 9        | 10996     | 6.3967    | 1          | 0.46508       | 28.7611 |
| GOTERM_MF_DIRECT      | GO:0036402~proteasome-activating ATPase activity                      | 4     | 0.405 | 0.0231653 | FBGN0036224, | 677        | 9        | 9284      | 6.0949    | 0.9999957  | 0.51644       | 28.8237 |
| GOTERM_CC_DIRECT      | GO:0031597~cytosolic proteasome complex                               | 4     | 0.405 | 0.0250713 | FBGN0036224, | 753        | 9        | 10026     | 5.9177    | 0.9999699  | 0.28525       | 29.9126 |
| GOTERM_CC_DIRECT      | GO:0031595~nuclear proteasome complex                                 | 4     | 0.405 | 0.0338571 | FBGN0036224, | 753        | 10       | 10026     | 5.3259    | 0.9999993  | 0.34815       | 38.2543 |
| GOTERM_CC_DIRECT      | GO:0008540~proteasome regulatory particle, base subcomplex            | 4     | 0.405 | 0.0822138 | FBGN0036224, | 753        | 14       | 10026     | 3.8042    | 1          | 0.5672        | 69.9081 |
| GOTERM_BP_DIRECT      | GO:0030433~ER-associated ubiquitin-dependent protein catabolic prc    | 4     | 0.405 | 0.1410546 | FBGN0036224, | 764        | 19       | 10996     | 3.03      | 1          | 0.88824       | 91.8311 |
| Annotation Cluster 15 | Enrichment Score: 1.4256013880954497                                  |       |       |           |              |            |          |           |           |            |               |         |
| Category              | Term                                                                  | Count | %     | PValue    | Genes        | List Total | Pop Hits | Pop Total | Fold Enri | Bonferroni | Benjamini FDR |         |
| GOTERM_BP_DIRECT      | GO:1901409~positive regulation of phosphorylation of RNA polymera     | 4     | 0.405 | 0.005678  | FBGN0040394, | 764        | 6        | 10996     | 9.5951    | 0.999651   | 0.21434       | 8.95393 |
| GOTERM_MF_DIRECT      | GO:0016538~cyclin-dependent protein serine/threonine kinase regula    | 4     | 0.405 | 0.0634909 | FBGN0040394, | 677        | 13       | 9284      | 4.2195    | 1          | 0.74912       | 61.3875 |
| GOTERM_CC_DIRECT      | GO:0000307~cyclin-dependent protein kinase holoenzyme complex         | 3     | 0.304 | 0.0688246 | FBGN0040394, | 753        | 6        | 10026     | 6.6574    | 1          | 0.51853       | 63.1449 |
| GOTERM_BP_DIRECT      | GO:0045737~positive regulation of cyclin-dependent protein serine/thi | 3     | 0.304 | 0.0799734 | FBGN0040394, | 764        | 7        | 10996     | 6.1683    | 1          | 0.79293       | 74.6689 |
| Annotation Cluster 16 | Enrichment Score: 1.2064808029886938                                  |       |       |           |              |            |          |           |           |            |               |         |
| Category              | Term                                                                  | Count | %     | PValue    | Genes        | List Total | Pop Hits | Pop Total | Fold Enri | Bonferroni | Benjamini FDR |         |
| GOTERM_BP_DIRECT      | GO:0006402~mRNA catabolic process                                     | 6     | 0.607 | 0.0081469 | FBGN0031047, | 764        | 19       | 10996     | 4.5451    | 0.9999892  | 0.27873       | 12.6075 |
| GOTERM_BP_DIRECT      | GO:0017148~negative regulation of translation                         | 6     | 0.607 | 0.1305463 | FBGN0031047, | 764        | 39       | 10996     | 2.2143    | 1          | 0.87513       | 90.0194 |
| GOTERM_CC_DIRECT      | GO:0030014~CCR4-NOT complex                                           | 3     | 0.304 | 0.2258386 | FBGN0031047, | 753        | 12       | 10026     | 3.3287    | 1          | 0.86196       | 97.2213 |
| Annotation Cluster 17 | Enrichment Score: 1.033449820259569                                   |       |       |           |              |            |          |           |           |            |               |         |
| Category              | Term                                                                  | Count | %     | PValue    | Genes        | List Total | Pop Hits | Pop Total | Fold Enri | Bonferroni | Benjamini FDR |         |
| GOTERM_BP_DIRECT      | GO:0016575~histone deacetylation                                      | 4     | 0.405 | 0.0564096 | FBGN0025825, | 764        | 13       | 10996     | 4.4285    | 1          | 0.71315       | 61.5773 |
| GOTERM_MF_DIRECT      | GO:0032041~NAD-dependent histone deacetylase activity (H3-K14 s       | 3     | 0.304 | 0.0870359 | FBGN0025825, | 677        | 7        | 9284      | 5.8772    | 1          | 0.81983       | 73.3126 |
| GOTERM_MF_DIRECT      | GO:0004407~histone deacetylase activity                               | 3     | 0.304 | 0.1616588 | FBGN0025825, | 677        | 10       | 9284      | 4.114     | 1          | 0.91331       | 92.254  |
| Annotation Cluster 18 | Enrichment Score: 0.9376591879883236                                  |       |       |           |              |            |          |           |           |            |               |         |
| Category              | Term                                                                  | Count | %     | PValue    | Genes        | List Total | Pop Hits | Pop Total | Fold Enri | Bonferroni | Benjamini FDR |         |
| GOTERM_BP_DIRECT      | GO:0048067~cuticle pigmentation                                       | 5     | 0.506 | 0.045714  | FBGN0036504, | 764        | 20       | 10996     | 3.5982    | 1          | 0.65781       | 53.7376 |
| GOTERM_BP_DIRECT      | GO:0042438~melanin biosynthetic process                               | 4     | 0.405 | 0.0810283 | FBGN0033367, | 764        | 15       | 10996     | 3.838     | 1          | 0.79301       | 75.1431 |
| GOTERM_MF_DIRECT      | GO:0016853~isomerase activity                                         | 4     | 0.405 | 0.4152752 | FBGN0036504, | 677        | 32       | 9284      | 1.7142    | 1          | 0.993         | 99.9584 |
| Annotation Cluster 19 | Enrichment Score: 0.8126855983354536                                  |       |       |           |              |            |          |           |           |            |               |         |
| Category              | Term                                                                  | Count | %     | PValue    | Genes        | List Total | Pop Hits | Pop Total | Fold Enri | Bonferroni | Benjamini FDR |         |
| GOTERM_MF_DIRECT      | GO:0017056~structural constituent of nuclear pore                     | 4     | 0.405 | 0.1219862 | FBGN0010660, | 677        | 17       | 9284      | 3.2267    | 1          | 0.86687       | 84.8511 |
| GOTERM_MF_DIRECT      | GO:0008139~nuclear localization sequence binding                      | 4     | 0.405 | 0.1219862 | FBGN0010660, | 677        | 17       | 9284      | 3.2267    | 1          | 0.86687       | 84.8511 |
| GOTERM_BP_DIRECT      | GO:0006405~RNA export from nucleus                                    | 3     | 0.304 | 0.174729  | FBGN0010660, | 764        | 11       | 10996     | 3.9253    | 1          | 0.92621       | 95.773  |
| GOTERM_MF_DIRECT      | GO:0005487~nucleocytoplasmic transporter activity                     | 3     | 0.304 | 0.2159092 | FBGN0010660, | 677        | 12       | 9284      | 3.4284    | 1          | 0.94926       | 97.0651 |
| Annotation Cluster 20 | Enrichment Score: 0.7414066943519563                                  |       |       |           |              |            |          |           |           |            |               |         |
| Category              | Term                                                                  | Count | %     | PValue    | Genes        | List Total | Pop Hits | Pop Total | Fold Enri | Bonferroni | Benjamini FDR |         |
| GOTERM_CC_DIRECT      | GO:0033181~plasma membrane proton-transporting V-type ATPase c        | 4     | 0.405 | 0.1303364 | FBGN0027779, | 753        | 17       | 10026     | 3.1329    | 1          | 0.71983       | 85.8411 |
| GOTERM_CC_DIRECT      | GO:0000221~vacuolar proton-transporting V-type ATPase, V1 domair      | 3     | 0.304 | 0.1424142 | FBGN0027779, | 753        | 9        | 10026     | 4.4382    | 1          | 0.74573       | 88.3585 |
| GOTERM_MF_DIRECT      | GO:0046961~proton-transporting ATPase activity, rotational mechanis   | 6     | 0.607 | 0.1752609 | FBGN0027779, | 677        | 41       | 9284      | 2.0068    | 1          | 0.92103       | 93.8904 |
| GOTERM_BP_DIRECT      | GO:0015991~ATP hydrolysis coupled proton transport                    | 5     | 0.506 | 0.3327126 | FBGN0027779, | 764        | 42       | 10996     | 1.7134    | 1          | 0.98484       | 99.8724 |
| Annotation Cluster 21 | Enrichment Score: 0.7021014351600119                                  |       |       |           |              |            |          |           |           |            |               |         |
| Category              | Term                                                                  | Count | %     | PValue    | Genes        | List Total | Pop Hits | Pop Total | Fold Enri | Bonferroni | Benjamini FDR |         |
| GOTERM_MF_DIRECT      | GO:0017056~structural constituent of nuclear pore                     | 4     | 0.405 | 0.1219862 | FBGN0010660, | 677        | 17       | 9284      | 3.2267    | 1          | 0.86687       | 84.8511 |
| GOTERM_BP_DIRECT      | GO:0007184~SMAD protein import into nucleus                           | 3     | 0.304 | 0.2267439 | FBGN0010660, | 764        | 13       | 10996     | 3.3214    | 1          | 0.95963       | 98.5537 |
| GOTERM_CC_DIRECT      | GO:0005643~nuclear pore                                               | 5     | 0.506 | 0.2830409 | FBGN0010660, | 753        | 36       | 10026     | 1.8493    | 1          | 0.90483       | 99.0512 |
| Annotation Cluster 22 | Enrichment Score: 0.6747314653843575                                  |       |       |           |              |            |          |           |           |            |               |         |
| Category              | Term                                                                  | Count | %     | PValue    | Genes        | List Total | Pop Hits | Pop Total | Fold Enri | Bonferroni | Benjamini FDR |         |
| GOTERM_BP_DIRECT      | GO:0007010~cytoskeleton organization                                  | 6     | 0.607 | 0.1008839 | FBGN0000046, | 764        | 36       | 10996     | 2.3988    | 1          | 0.84407       | 82.6552 |
| GOTERM_MF_DIRECT      | GO:0005200~structural constituent of cytoskeleton                     | 6     | 0.607 | 0.2838905 | FBGN0000046, | 677        | 49       | 9284      | 1.6792    | 1          | 0.97635       | 99.2126 |

|                       |                                                                                                                  |       |       |           |              |            |          |           |           |            |               |         |
|-----------------------|------------------------------------------------------------------------------------------------------------------|-------|-------|-----------|--------------|------------|----------|-----------|-----------|------------|---------------|---------|
| GOTERM_CC_DIRECT      | GO:0005884~actin filament                                                                                        | 4     | 0.405 | 0.3302424 | FBGN0000046, | 753        | 27       | 10026     | 1.9726    | 1          | 0.9294        | 99.6343 |
| Annotation Cluster 23 | Enrichment Score: 0.653438915592703                                                                              |       |       |           |              |            |          |           |           |            |               |         |
| Category              | Term                                                                                                             | Count | %     | PValue    | Genes        | List Total | Pop Hits | Pop Total | Fold Enri | Bonferroni | Benjamini FDR |         |
| GOTERM_MF_DIRECT      | GO:0003743~translation initiation factor activity                                                                | 9     | 0.911 | 0.0484654 | FBGN0034654, | 677        | 56       | 9284      | 2.2039    | 1          | 0.71255       | 51.3583 |
| GOTERM_CC_DIRECT      | GO:0016282~eukaryotic 43S preinitiation complex                                                                  | 3     | 0.304 | 0.4488624 | FBGN0034654, | 753        | 20       | 10026     | 1.9972    | 1          | 0.96638       | 99.9761 |
| GOTERM_BP_DIRECT      | GO:0001731~formation of translation preinitiation complex                                                        | 3     | 0.304 | 0.5036614 | FBGN0034654, | 764        | 24       | 10996     | 1.7991    | 1          | 0.99754       | 99.999  |
| Annotation Cluster 24 | Enrichment Score: 0.6301013782617502                                                                             |       |       |           |              |            |          |           |           |            |               |         |
| Category              | Term                                                                                                             | Count | %     | PValue    | Genes        | List Total | Pop Hits | Pop Total | Fold Enri | Bonferroni | Benjamini FDR |         |
| GOTERM_MF_DIRECT      | GO:0005484~SNAP receptor activity                                                                                | 5     | 0.506 | 0.1042792 | FBGN0039212, | 677        | 25       | 9284      | 2.7427    | 1          | 0.83694       | 79.7617 |
| GOTERM_BP_DIRECT      | GO:0048278~vesicle docking                                                                                       | 3     | 0.304 | 0.1495192 | FBGN0037084, | 764        | 10       | 10996     | 4.3178    | 1          | 0.89608       | 93.0608 |
| GOTERM_MF_DIRECT      | GO:0000149~SNARE binding                                                                                         | 5     | 0.506 | 0.1858826 | FBGN0039212, | 677        | 31       | 9284      | 2.2118    | 1          | 0.92888       | 94.9377 |
| GOTERM_BP_DIRECT      | GO:0016081~synaptic vesicle docking                                                                              | 4     | 0.405 | 0.1931788 | FBGN0037084, | 764        | 22       | 10996     | 2.6168    | 1          | 0.94105       | 97.0875 |
| GOTERM_BP_DIRECT      | GO:0006906~vesicle fusion                                                                                        | 4     | 0.405 | 0.2301859 | FBGN0037084, | 764        | 24       | 10996     | 2.3988    | 1          | 0.9607        | 98.6562 |
| GOTERM_CC_DIRECT      | GO:0031201~SNARE complex                                                                                         | 5     | 0.506 | 0.2659278 | FBGN0039212, | 753        | 35       | 10026     | 1.9021    | 1          | 0.9002        | 98.68   |
| GOTERM_BP_DIRECT      | GO:0007269~neurotransmitter secretion                                                                            | 8     | 0.81  | 0.4229143 | FBGN0000346, | 764        | 89       | 10996     | 1.2937    | 1          | 0.99464       | 99.9883 |
| GOTERM_CC_DIRECT      | GO:0098793~presynapse                                                                                            | 5     | 0.506 | 0.6280604 | FBGN0039774, | 753        | 57       | 10026     | 1.168     | 1          | 0.99244       | 99.9999 |
| Annotation Cluster 25 | Enrichment Score: 0.3098311395278172                                                                             |       |       |           |              |            |          |           |           |            |               |         |
| Category              | Term                                                                                                             | Count | %     | PValue    | Genes        | List Total | Pop Hits | Pop Total | Fold Enri | Bonferroni | Benjamini FDR |         |
| GOTERM_BP_DIRECT      | GO:0000413~protein peptidyl-prolyl isomerization                                                                 | 3     | 0.304 | 0.3581967 | FBGN0036207, | 764        | 18       | 10996     | 2.3988    | 1          | 0.98917       | 99.9328 |
| GOTERM_BP_DIRECT      | GO:0006457~protein folding                                                                                       | 9     | 0.911 | 0.4773894 | FBGN0036207, | 764        | 108      | 10996     | 1.1994    | 1          | 0.99679       | 99.9977 |
| GOTERM_MF_DIRECT      | GO:0003755~peptidyl-prolyl cis-trans isomerase activity                                                          | 3     | 0.304 | 0.6878793 | FBGN0036207, | 677        | 32       | 9284      | 1.2856    | 1          | 0.99938       | 100     |
| Annotation Cluster 26 | Enrichment Score: 0.2648556496671683                                                                             |       |       |           |              |            |          |           |           |            |               |         |
| Category              | Term                                                                                                             | Count | %     | PValue    | Genes        | List Total | Pop Hits | Pop Total | Fold Enri | Bonferroni | Benjamini FDR |         |
| GOTERM_CC_DIRECT      | GO:0019005~SCF ubiquitin ligase complex                                                                          | 7     | 0.709 | 0.3610959 | FBGN0038566, | 753        | 65       | 10026     | 1.4339    | 1          | 0.94583       | 99.811  |
| GOTERM_BP_DIRECT      | GO:0031146~SCF-dependent proteasomal ubiquitin-dependent proteolysis                                             | 4     | 0.405 | 0.6425312 | FBGN0038566, | 764        | 47       | 10996     | 1.2249    | 1          | 0.9995        | 100     |
| GOTERM_BP_DIRECT      | GO:0016567~protein ubiquitination                                                                                | 10    | 1.012 | 0.6916976 | FBGN0038566, | 764        | 146      | 10996     | 0.9858    | 1          | 0.99971       | 100     |
| Annotation Cluster 27 | Enrichment Score: 0.21204216999006045                                                                            |       |       |           |              |            |          |           |           |            |               |         |
| Category              | Term                                                                                                             | Count | %     | PValue    | Genes        | List Total | Pop Hits | Pop Total | Fold Enri | Bonferroni | Benjamini FDR |         |
| GOTERM_CC_DIRECT      | GO:0019005~SCF ubiquitin ligase complex                                                                          | 7     | 0.709 | 0.3610959 | FBGN0038566, | 753        | 65       | 10026     | 1.4339    | 1          | 0.94583       | 99.811  |
| GOTERM_BP_DIRECT      | GO:0042787~protein ubiquitination involved in ubiquitin-dependent proteolysis                                    | 6     | 0.607 | 0.7016495 | FBGN0040291, | 764        | 84       | 10996     | 1.028     | 1          | 0.99975       | 100     |
| GOTERM_MF_DIRECT      | GO:0004842~ubiquitin-protein transferase activity                                                                | 10    | 1.012 | 0.9122854 | FBGN0038566, | 677        | 179      | 9284      | 0.7661    | 1          | 1             | 100     |
| Annotation Cluster 28 | Enrichment Score: 0.1493318492312938                                                                             |       |       |           |              |            |          |           |           |            |               |         |
| Category              | Term                                                                                                             | Count | %     | PValue    | Genes        | List Total | Pop Hits | Pop Total | Fold Enri | Bonferroni | Benjamini FDR |         |
| GOTERM_MF_DIRECT      | GO:0008017~microtubule binding                                                                                   | 9     | 0.911 | 0.5115339 | FBGN0001202, | 677        | 106      | 9284      | 1.1643    | 1          | 0.99726       | 99.9969 |
| GOTERM_CC_DIRECT      | GO:0005871~kinesin complex                                                                                       | 3     | 0.304 | 0.7039009 | FBGN0004381, | 753        | 32       | 10026     | 1.2483    | 1          | 0.99718       | 100     |
| GOTERM_MF_DIRECT      | GO:0003777~microtubule motor activity                                                                            | 3     | 0.304 | 0.748882  | FBGN0004381, | 677        | 36       | 9284      | 1.1428    | 1          | 0.99975       | 100     |
| GOTERM_BP_DIRECT      | GO:0007018~microtubule-based movement                                                                            | 4     | 0.405 | 0.9372886 | FBGN0004381, | 764        | 84       | 10996     | 0.6854    | 1          | 1             | 100     |
| Annotation Cluster 29 | Enrichment Score: 0.1259756760089817                                                                             |       |       |           |              |            |          |           |           |            |               |         |
| Category              | Term                                                                                                             | Count | %     | PValue    | Genes        | List Total | Pop Hits | Pop Total | Fold Enri | Bonferroni | Benjamini FDR |         |
| GOTERM_BP_DIRECT      | GO:0006468~protein phosphorylation                                                                               | 18    | 1.822 | 0.6742697 | FBGN0029970, | 764        | 266      | 10996     | 0.9739    | 1          | 0.99964       | 100     |
| GOTERM_MF_DIRECT      | GO:0004674~protein serine/threonine kinase activity                                                              | 11    | 1.113 | 0.7082115 | FBGN0041203, | 677        | 156      | 9284      | 0.967     | 1          | 0.99952       | 100     |
| GOTERM_MF_DIRECT      | GO:0004672~protein kinase activity                                                                               | 9     | 0.911 | 0.8771551 | FBGN0041203, | 677        | 153      | 9284      | 0.8067    | 1          | 0.99999       | 100     |
| Annotation Cluster 30 | Enrichment Score: 0.11463557599085497                                                                            |       |       |           |              |            |          |           |           |            |               |         |
| Category              | Term                                                                                                             | Count | %     | PValue    | Genes        | List Total | Pop Hits | Pop Total | Fold Enri | Bonferroni | Benjamini FDR |         |
| GOTERM_MF_DIRECT      | GO:0008010~structural constituent of chitin-based larval cuticle                                                 | 8     | 0.81  | 0.6608066 | FBGN0020644, | 677        | 106      | 9284      | 1.035     | 1          | 0.99919       | 100     |
| GOTERM_MF_DIRECT      | GO:0042302~structural constituent of cuticle                                                                     | 8     | 0.81  | 0.7163032 | FBGN0020644, | 677        | 112      | 9284      | 0.9795    | 1          | 0.99956       | 100     |
| GOTERM_CC_DIRECT      | GO:0031012~extracellular matrix                                                                                  | 9     | 0.911 | 0.8449459 | FBGN0020644, | 753        | 142      | 10026     | 0.8439    | 1          | 0.99973       | 100     |
| GOTERM_BP_DIRECT      | GO:0040003~chitin-based cuticle development                                                                      | 9     | 0.911 | 0.8698763 | FBGN0020644, | 764        | 159      | 10996     | 0.8147    | 1          | 1             | 100     |
| Annotation Cluster 31 | Enrichment Score: 0.09228945423908888                                                                            |       |       |           |              |            |          |           |           |            |               |         |
| Category              | Term                                                                                                             | Count | %     | PValue    | Genes        | List Total | Pop Hits | Pop Total | Fold Enri | Bonferroni | Benjamini FDR |         |
| GOTERM_BP_DIRECT      | GO:0032482~Rab protein signal transduction                                                                       | 3     | 0.304 | 0.6938906 | FBGN0016701, | 764        | 34       | 10996     | 1.2699    | 1          | 0.99971       | 100     |
| GOTERM_MF_DIRECT      | GO:0003924~GTPase activity                                                                                       | 9     | 0.911 | 0.7618787 | FBGN0003886, | 677        | 133      | 9284      | 0.928     | 1          | 0.9998        | 100     |
| GOTERM_CC_DIRECT      | GO:0045202~synapse                                                                                               | 6     | 0.607 | 0.8940689 | FBGN0001202, | 753        | 103      | 10026     | 0.7756    | 1          | 0.99992       | 100     |
| GOTERM_CC_DIRECT      | GO:0031982~vesicle                                                                                               | 3     | 0.304 | 0.9042622 | FBGN0016701, | 753        | 51       | 10026     | 0.7832    | 1          | 0.99994       | 100     |
| Annotation Cluster 32 | Enrichment Score: 0.028904186706984126                                                                           |       |       |           |              |            |          |           |           |            |               |         |
| Category              | Term                                                                                                             | Count | %     | PValue    | Genes        | List Total | Pop Hits | Pop Total | Fold Enri | Bonferroni | Benjamini FDR |         |
| GOTERM_MF_DIRECT      | GO:0005549~odorant binding                                                                                       | 7     | 0.709 | 0.8343851 | FBGN0062565, | 677        | 112      | 9284      | 0.8571    | 1          | 0.99996       | 100     |
| GOTERM_CC_DIRECT      | GO:0032590~dendrite membrane                                                                                     | 3     | 0.304 | 0.9583177 | FBGN0062565, | 753        | 64       | 10026     | 0.6241    | 1          | 0.99999       | 100     |
| GOTERM_BP_DIRECT      | GO:0050911~detection of chemical stimulus involved in sensory perception                                         | 3     | 0.304 | 0.9644908 | FBGN0062565, | 764        | 72       | 10996     | 0.5997    | 1          | 1             | 100     |
| GOTERM_MF_DIRECT      | GO:0004984~olfactory receptor activity                                                                           | 4     | 0.405 | 0.9935943 | FBGN0052693, | 677        | 119      | 9284      | 0.461     | 1          | 1             | 100     |
| Annotation Cluster 33 | Enrichment Score: 0.014790441734365816                                                                           |       |       |           |              |            |          |           |           |            |               |         |
| Category              | Term                                                                                                             | Count | %     | PValue    | Genes        | List Total | Pop Hits | Pop Total | Fold Enri | Bonferroni | Benjamini FDR |         |
| GOTERM_MF_DIRECT      | GO:0016705~oxidoreductase activity, acting on paired donors, with incorporation or reduction of molecular oxygen | 5     | 0.506 | 0.9062324 | FBGN0038680, | 677        | 91       | 9284      | 0.7535    | 1          | 1             | 100     |
| GOTERM_MF_DIRECT      | GO:0004497~monooxygenase activity                                                                                | 4     | 0.405 | 0.9599886 | FBGN0038680, | 677        | 88       | 9284      | 0.6233    | 1          | 1             | 100     |
| GOTERM_CC_DIRECT      | GO:0031090~organelle membrane                                                                                    | 3     | 0.304 | 0.9846227 | FBGN0031182, | 753        | 79       | 10026     | 0.5056    | 1          | 1             | 100     |
| GOTERM_MF_DIRECT      | GO:0020037~heme binding                                                                                          | 5     | 0.506 | 0.989     | FBGN0038680, | 677        | 132      | 9284      | 0.5194    | 1          | 1             | 100     |
| GOTERM_MF_DIRECT      | GO:0005506~iron ion binding                                                                                      | 5     | 0.506 | 0.9955797 | FBGN0038680, | 677        | 148      | 9284      | 0.4633    | 1          | 1             | 100     |

#### Functional Annotation Chart

| Category         | Term                                                     | Count | %     | PValue   | Genes        | List Total | Pop Hits | Pop Total | Fold Enri | Bonferroni | Benjamini FDR |          |
|------------------|----------------------------------------------------------|-------|-------|----------|--------------|------------|----------|-----------|-----------|------------|---------------|----------|
| GOTERM_CC_DIRECT | GO:0005634~nucleus                                       | 225   | 22.77 | 8.60E-16 | FBGN0040465, | 753        | 1832     | 10026     | 1.6353    | 3.64E-13   | 3.64E-13      | 1.24E-12 |
| GOTERM_BP_DIRECT | GO:0006366~transcription from RNA polymerase II promoter | 26    | 2.63  | 7.52E-13 | FBGN0000617, | 764        | 67       | 10996     | 5.5852    | 1.05E-09   | 1.05E-09      | 1.24E-09 |

|                  |                                                                     |    |      |           |               |     |     |       |        |           |          |          |
|------------------|---------------------------------------------------------------------|----|------|-----------|---------------|-----|-----|-------|--------|-----------|----------|----------|
| GOTERM_BP_DIRECT | GO:0006367~transcription initiation from RNA polymerase II promoter | 25 | 2.53 | 1.91E-12  | FBGN0000617,  | 764 | 64  | 10996 | 5.6221 | 2.67E-09  | 1.34E-09 | 3.15E-09 |
| GOTERM_BP_DIRECT | GO:0006357~regulation of transcription from RNA polymerase II prom  | 41 | 4.15 | 7.23E-12  | FBGN0024330,  | 764 | 173 | 10996 | 3.411  | 1.01E-08  | 3.37E-09 | 1.19E-08 |
| GOTERM_CC_DIRECT | GO:0016592~mediator complex                                         | 17 | 1.72 | 2.99E-10  | FBGN0024330,  | 753 | 33  | 10026 | 6.8591 | 1.22E-07  | 6.12E-08 | 4.18E-07 |
| GOTERM_MF_DIRECT | GO:0001104~RNA polymerase II transcription cofactor activity        | 17 | 1.72 | 3.35E-10  | FBGN0024330,  | 677 | 34  | 9284  | 6.8567 | 1.77E-07  | 1.77E-07 | 4.86E-07 |
| GOTERM_BP_DIRECT | GO:0051298~centrosome duplication                                   | 29 | 2.94 | 6.50E-10  | FBGN0003886,  | 764 | 108 | 10996 | 3.8647 | 9.09E-07  | 2.27E-07 | 1.07E-06 |
| GOTERM_BP_DIRECT | GO:0022008~neurogenesis                                             | 77 | 7.79 | 1.20E-08  | FBGN0032262,  | 764 | 565 | 10996 | 1.9615 | 1.68E-05  | 3.35E-06 | 1.98E-05 |
| GOTERM_MF_DIRECT | GO:0003677~DNA binding                                              | 78 | 7.89 | 1.67E-08  | FBGN0002914,  | 677 | 555 | 9284  | 1.9273 | 8.78E-06  | 4.39E-06 | 2.42E-05 |
| GOTERM_CC_DIRECT | GO:0005700~polytene chromosome                                      | 37 | 3.74 | 4.15E-08  | FBGN0002914,  | 753 | 180 | 10026 | 2.7369 | 1.70E-05  | 5.68E-06 | 5.82E-05 |
| GOTERM_BP_DIRECT | GO:0006351~transcription, DNA-templated                             | 55 | 5.57 | 2.15E-07  | FBGN0045852,  | 764 | 376 | 10996 | 2.1053 | 3.01E-04  | 5.01E-05 | 3.54E-04 |
| GOTERM_CC_DIRECT | GO:0000502~proteasome complex                                       | 16 | 1.62 | 2.42E-07  | FBGN0050382,  | 753 | 43  | 10026 | 4.9543 | 9.91E-05  | 2.48E-05 | 3.38E-04 |
| GOTERM_CC_DIRECT | GO:0005704~polytene chromosome band                                 | 13 | 1.32 | 2.88E-07  | FBGN0039169,  | 753 | 28  | 10026 | 6.1818 | 1.18E-04  | 2.36E-05 | 4.03E-04 |
| GOTERM_MF_DIRECT | GO:0003723~RNA binding                                              | 44 | 4.45 | 8.43E-07  | FBGN0017457,  | 677 | 271 | 9284  | 2.2265 | 4.44E-04  | 1.48E-04 | 0.00122  |
| GOTERM_CC_DIRECT | GO:0005839~proteasome core complex                                  | 10 | 1.01 | 1.01E-06  | FBGN0050382,  | 753 | 17  | 10026 | 7.8322 | 4.13E-04  | 6.88E-05 | 0.00141  |
| GOTERM_BP_DIRECT | GO:0007526~larval somatic muscle development                        | 16 | 1.62 | 1.09E-06  | FBGN0030855,  | 764 | 51  | 10996 | 4.5153 | 0.0015285 | 2.18E-04 | 0.0018   |
| GOTERM_BP_DIRECT | GO:0007095~mitotic G2 DNA damage checkpoint                         | 9  | 0.92 | 1.34E-06  | FBGN0037121,  | 764 | 72  | 10996 | 3.7981 | 0.0018666 | 2.34E-04 | 0.0022   |
| GOTERM_CC_DIRECT | GO:0035060~brahma complex                                           | 19 | 1.91 | 1.93E-06  | FBGN0011715,  | 753 | 14  | 10026 | 8.5595 | 7.91E-04  | 1.13E-04 | 0.0027   |
| GOTERM_MF_DIRECT | GO:0005515~protein binding                                          | 80 | 8.10 | 2.38E-06  | FBGN0040465,  | 677 | 647 | 9284  | 1.6956 | 0.0012539 | 3.14E-04 | 0.00345  |
| GOTERM_CC_DIRECT | GO:0022625~cytosolic large ribosomal subunit                        | 17 | 1.72 | 3.44E-06  | FBGN0086710,  | 753 | 58  | 10026 | 3.9026 | 0.001411  | 1.76E-04 | 0.00482  |
| GOTERM_CC_DIRECT | GO:0000788~nuclear nucleosome                                       | 18 | 1.82 | 5.98E-06  | FBGN0053812,  | 753 | 67  | 10026 | 3.5771 | 0.0024503 | 2.73E-04 | 0.00838  |
| GOTERM_BP_DIRECT | GO:0043161~proteasome-mediated ubiquitin-dependent protein cata     | 20 | 2.02 | 7.19E-06  | FBGN0050382,  | 764 | 88  | 10996 | 3.2711 | 0.0099988 | 0.00112  | 0.01184  |
| GOTERM_MF_DIRECT | GO:0004298~threonine-type endopeptidase activity                    | 11 | 1.11 | 1.06E-05  | FBGN0050382,  | 677 | 27  | 9284  | 5.587  | 0.0055667 | 0.00112  | 0.01537  |
| GOTERM_BP_DIRECT | GO:0006355~regulation of transcription, DNA-templated               | 52 | 5.26 | 1.68E-05  | FBGN0045852,  | 764 | 401 | 10996 | 1.8664 | 0.0232489 | 0.00235  | 0.02772  |
| GOTERM_CC_DIRECT | GO:0005811~lipid particle                                           | 42 | 4.25 | 1.93E-05  | FBGN0000046,  | 753 | 277 | 10026 | 2.0188 | 0.00789   | 7.92E-04 | 0.02704  |
| GOTERM_BP_DIRECT | GO:0006334~nucleosome assembly                                      | 24 | 2.43 | 2.08E-05  | FBGN0034975,  | 764 | 128 | 10996 | 2.6986 | 0.0286025 | 0.00263  | 0.03419  |
| GOTERM_MF_DIRECT | GO:0004175~endopeptidase activity                                   | 13 | 1.32 | 2.91E-05  | FBGN0037022,  | 677 | 42  | 9284  | 4.2446 | 0.0152376 | 0.00256  | 0.04226  |
| GOTERM_CC_DIRECT | GO:0000790~nuclear chromatin                                        | 19 | 1.92 | 4.64E-05  | FBGN0037751,  | 753 | 85  | 10026 | 2.9762 | 0.0188264 | 0.00173  | 0.06487  |
| GOTERM_CC_DIRECT | GO:0005665~DNA-directed RNA polymerase II, core complex             | 8  | 0.81 | 4.90E-05  | FBGN0004855,  | 753 | 15  | 10026 | 7.1012 | 0.0198841 | 0.00167  | 0.06855  |
| GOTERM_BP_DIRECT | GO:0035195~gene silencing by miRNA                                  | 8  | 0.81 | 4.95E-05  | FBGN0033062,  | 764 | 16  | 10996 | 7.1963 | 0.066861  | 0.00575  | 0.08151  |
| GOTERM_BP_DIRECT | GO:0006325~chromatin organization                                   | 15 | 1.52 | 5.59E-05  | FBGN0029094,  | 764 | 61  | 10996 | 3.5392 | 0.075222  | 0.006    | 0.09211  |
| GOTERM_BP_DIRECT | GO:0000184~nuclear-transcribed mRNA catabolic process, nonsense     | 8  | 0.81 | 7.91E-05  | FBGN0033378,  | 764 | 17  | 10996 | 6.773  | 0.1047253 | 0.00787  | 0.13027  |
| GOTERM_CC_DIRECT | GO:0005840~ribosome                                                 | 20 | 2.02 | 1.03E-04  | FBGN0086710,  | 753 | 98  | 10026 | 2.7173 | 0.0411683 | 0.00323  | 0.14343  |
| GOTERM_MF_DIRECT | GO:0003899~DNA-directed RNA polymerase activity                     | 10 | 1.01 | 1.07E-04  | FBGN0004855,  | 677 | 28  | 9284  | 4.8977 | 0.0547643 | 0.00801  | 0.15492  |
| GOTERM_BP_DIRECT | GO:0007067~mitotic nuclear division                                 | 23 | 2.33 | 2.20E-04  | FBGN0002914,  | 764 | 139 | 10996 | 2.3815 | 0.2644642 | 0.02027  | 0.36129  |
| GOTERM_BP_DIRECT | GO:0016246~RNA interference                                         | 10 | 1.01 | 2.33E-04  | FBGN0033062,  | 764 | 32  | 10996 | 4.4977 | 0.2784505 | 0.02019  | 0.38383  |
| GOTERM_MF_DIRECT | GO:0003729~mRNA binding                                             | 27 | 2.73 | 2.54E-04  | FBGN0004237,  | 677 | 171 | 9284  | 2.1653 | 0.1253201 | 0.0166   | 0.3679   |
| GOTERM_MF_DIRECT | GO:0000166~nucleotide binding                                       | 31 | 3.14 | 3.20E-04  | FBGN0004237,  | 677 | 212 | 9284  | 2.0053 | 0.1553018 | 0.01858  | 0.46352  |
| GOTERM_CC_DIRECT | GO:0030529~intracellular ribonucleoprotein complex                  | 9  | 0.91 | 3.30E-04  | FBGN0004237,  | 753 | 25  | 10026 | 4.7933 | 0.126722  | 0.00963  | 0.46156  |
| GOTERM_BP_DIRECT | GO:0007406~negative regulation of neuroblast proliferation          | 9  | 0.91 | 3.51E-04  | FBGN0032833,  | 764 | 27  | 10996 | 4.7976 | 0.3880274 | 0.02847  | 0.577    |
| GOTERM_CC_DIRECT | GO:0070847~core mediator complex                                    | 6  | 0.61 | 4.29E-04  | FBGN0024330,  | 753 | 10  | 10026 | 7.9888 | 0.1614252 | 0.01167  | 0.59927  |
| GOTERM_BP_DIRECT | GO:0002181~cytoplasmic translation                                  | 18 | 1.82 | 4.78E-04  | FBGN0086710,  | 764 | 100 | 10996 | 2.5907 | 0.4871489 | 0.03642  | 0.7838   |
| GOTERM_CC_DIRECT | GO:0005875~microtubule associated complex                           | 40 | 4.05 | 5.01E-04  | FBGN0000043,  | 753 | 300 | 10026 | 1.7753 | 0.1858456 | 0.01277  | 0.69952  |
| GOTERM_MF_DIRECT | GO:0003713~transcription coactivator activity                       | 13 | 1.32 | 6.79E-04  | FBGN0020496,  | 677 | 57  | 9284  | 3.1276 | 0.3007839 | 0.03515  | 0.98008  |
| GOTERM_BP_DIRECT | GO:0006378~mRNA polyadenylation                                     | 8  | 0.81 | 6.91E-04  | FBGN0015949,  | 764 | 23  | 10996 | 5.0061 | 0.6193119 | 0.04956  | 1.1316   |
| GOTERM_CC_DIRECT | GO:0005694~chromosome                                               | 17 | 1.72 | 7.47E-04  | FBGN0010278,  | 753 | 88  | 10026 | 2.5722 | 0.2639168 | 0.01786  | 1.0407   |
| GOTERM_CC_DIRECT | GO:0000786~nucleosome                                               | 20 | 2.02 | 0.0010629 | FBGN0034975,  | 753 | 117 | 10026 | 2.276  | 0.3533954 | 0.02393  | 1.47763  |
| GOTERM_CC_DIRECT | GO:0031523~Myb complex                                              | 6  | 0.61 | 0.0011884 | FBGN0002914,  | 753 | 12  | 10026 | 6.6574 | 0.3858677 | 0.02533  | 1.65079  |
| GOTERM_BP_DIRECT | GO:0045944~positive regulation of transcription from RNA polymeras  | 30 | 3.04 | 0.0010903 | FBGN00000370, | 764 | 228 | 10996 | 1.8938 | 0.7823937 | 0.07342  | 1.78106  |
| GOTERM_BP_DIRECT | GO:0006360~transcription from RNA polymerase I promoter             | 6  | 0.61 | 0.0012774 | FBGN0033929,  | 764 | 13  | 10996 | 6.6428 | 0.8325404 | 0.08158  | 2.08377  |
| GOTERM_MF_DIRECT | GO:0008134~transcription factor binding                             | 16 | 1.62 | 0.0013997 | FBGN0020496,  | 677 | 87  | 9284  | 2.522  | 0.5220095 | 0.0649   | 2.01146  |
| GOTERM_BP_DIRECT | GO:0000122~negative regulation of transcription from RNA polymeras  | 22 | 2.23 | 0.0014371 | FBGN0020496,  | 764 | 149 | 10996 | 2.1251 | 0.8660742 | 0.08733  | 2.34126  |
| GOTERM_BP_DIRECT | GO:0034472~snRNA 3'-end processing                                  | 6  | 0.61 | 0.0018745 | FBGN0031314,  | 764 | 14  | 10996 | 6.1683 | 0.9274189 | 0.10778  | 3.04368  |
| GOTERM_BP_DIRECT | GO:0010628~positive regulation of gene expression                   | 8  | 0.81 | 0.0019605 | FBGN0025463,  | 764 | 27  | 10996 | 4.2645 | 0.9356543 | 0.10802  | 3.18118  |
| GOTERM_MF_DIRECT | GO:0046982~protein heterodimerization activity                      | 30 | 3.04 | 0.0020731 | FBGN00000370, | 677 | 227 | 9284  | 1.8123 | 0.6650023 | 0.08711  | 2.96561  |
| GOTERM_BP_DIRECT | GO:0006383~transcription from RNA polymerase III promoter           | 6  | 0.61 | 0.0026527 | FBGN0037121,  | 764 | 15  | 10996 | 5.7571 | 0.9756072 | 0.13803  | 4.28153  |
| GOTERM_BP_DIRECT | GO:0016569~covalent chromatin modification                          | 8  | 0.81 | 0.0030518 | FBGN0029755,  | 764 | 29  | 10996 | 3.9704 | 0.9860601 | 0.15155  | 4.91057  |
| GOTERM_BP_DIRECT | GO:0045893~positive regulation of transcription, DNA-templated      | 18 | 1.82 | 0.0034067 | FBGN0004892,  | 764 | 119 | 10996 | 2.177  | 0.9915261 | 0.16196  | 5.46669  |
| GOTERM_BP_DIRECT | GO:0045892~negative regulation of transcription, DNA-templated      | 18 | 1.82 | 0.0037203 | FBGN0020496,  | 764 | 120 | 10996 | 2.1589 | 0.9945417 | 0.1698   | 5.9554   |
| GOTERM_BP_DIRECT | GO:0030261~chromosome condensation                                  | 8  | 0.81 | 0.0037467 | FBGN0002914,  | 764 | 30  | 10996 | 3.838  | 0.9947403 | 0.16553  | 5.99646  |
| GOTERM_CC_DIRECT | GO:0019013~viral nucleocapsid                                       | 4  | 0.40 | 0.0037469 | FBGN0004237,  | 753 | 5   | 10026 | 10.652 | 0.7854254 | 0.07407  | 5.11909  |
| GOTERM_BP_DIRECT | GO:0000398~mRNA splicing, via spliceosome                           | 28 | 2.83 | 0.0039038 | FBGN0017457,  | 764 | 226 | 10996 | 1.7832 | 0.995781  | 0.16663  | 6.24039  |
| GOTERM_MF_DIRECT | GO:0008353~RNA polymerase II carboxy-terminal domain kinase acti    | 5  | 0.51 | 0.0041019 | FBGN0019949,  | 677 | 10  | 9284  | 6.8567 | 0.8853845 | 0.15349  | 5.78858  |
| GOTERM_BP_DIRECT | GO:0000278~mitotic cell cycle                                       | 11 | 1.11 | 0.0041078 | FBGN0002914,  | 764 | 55  | 10996 | 2.8785 | 0.9968316 | 0.16942  | 6.56525  |
| GOTERM_CC_DIRECT | GO:0005847~mRNA cleavage and polyadenylation specificity factor c   | 5  | 0.51 | 0.0045711 | FBGN0027873,  | 753 | 10  | 10026 | 6.6574 | 0.8471752 | 0.08557  | 6.21209  |
| GOTERM_CC_DIRECT | GO:0005675~holo TFIIF complex                                       | 5  | 0.51 | 0.0045711 | FBGN0033929,  | 753 | 10  | 10026 | 6.6574 | 0.8471752 | 0.08557  | 6.21209  |
| GOTERM_BP_DIRECT | GO:0006379~mRNA cleavage                                            | 6  | 0.61 | 0.004867  | FBGN0027873,  | 764 | 17  | 10996 | 5.0798 | 0.9989091 | 0.19196  | 7.72291  |
| GOTERM_BP_DIRECT | GO:1901409~positive regulation of phosphorylation of RNA polymeras  | 4  | 0.40 | 0.005678  | FBGN0040394,  | 764 | 6   | 10996 | 9.5951 | 0.999651  | 0.21434  | 8.95393  |
| GOTERM_BP_DIRECT | GO:0006974~cellular response to DNA damage stimulus                 | 16 | 1.62 | 0.0057527 | FBGN0050382,  | 764 | 105 | 10996 | 2.1932 | 0.9996858 | 0.21118  | 9.06655  |
| GOTERM_BP_DIRECT | GO:0006402~mRNA catabolic process                                   | 6  | 0.61 | 0.0081469 | FBGN0031047,  | 764 | 19  | 10996 | 4.5451 | 0.9998982 | 0.27873  | 12.6075  |
| GOTERM_CC_DIRECT | GO:0005666~DNA-directed RNA polymerase III complex                  | 6  | 0.61 | 0.0088138 | FBGN0037121,  | 753 | 18  | 10026 | 4.4382 | 0.9734753 | 0.15209  | 11.6553  |
| GOTERM_MF_DIRECT | GO:0003676~nucleic acid binding                                     | 46 | 4.66 | 0.0089446 | FBGN0026263,  | 677 | 432 | 9284  | 1.4602 | 0.9912178 | 0.28696  | 12.2205  |
| GOTERM_BP_DIRECT | GO:0006368~transcription elongation from RNA polymerase II promot   | 7  | 0.71 | 0.0091978 | FBGN0019949,  | 764 | 27  | 10996 | 3.7314 | 0.9999975 | 0.30151  | 14.1204  |
| GOTERM_BP_DIRECT | GO:0001113~transcriptional open complex formation at RNA polymer    | 4  | 0.40 | 0.0094268 | FBGN0033929,  | 764 | 7   | 10996 | 8.2244 | 0.9999982 | 0.30084  | 14.4469  |
| GOTERM_BP_DIRECT | GO:0007030~Golgi organization                                       | 13 | 1.32 | 0.0106113 | FBGN0002914,  | 764 | 82  | 10996 | 2.2818 | 0.9999997 | 0.32461  | 16.1167  |
| GOTERM_BP_DIRECT | GO:0016573~histone acetylation                                      | 10 | 1.01 | 0.012668  | FBGN0034975,  | 764 | 55  | 10996 | 2.6168 | 1         | 0.36682  | 18.9435  |
| GOTERM_BP_DIRECT | GO:0007307~eggshell chorion gene amplification                      | 6  | 0.61 | 0.0127062 | FBGN0002914,  | 764 | 21  | 10996 | 4.1122 | 1         | 0.36041  | 18.9951  |
| GOTERM_CC_DIRECT | GO:0005736~DNA-directed RNA polymerase I complex                    | 5  | 0.51 | 0.0129852 | FBGN0037121,  | 753 | 13  | 10026 | 5.1211 | 0.9952934 | 0.20784  | 16.7198  |
| GOTERM_BP_DIRECT | GO:0016570~histone modification                                     | 5  | 0.51 | 0.0131346 | FBGN0035205,  | 764 | 14  | 10996 | 5.1402 | 1         | 0.3629   | 19.5722  |
| GOTERM_CC_DIRECT | GO:0000228~nuclear chromosome                                       | 10 | 1.01 | 0.01423   | FBGN0011715,  | 753 | 52  | 10026 | 2.5605 | 0.9971946 | 0.21717  | 18.1781  |
| GOTERM_BP_DIRECT | GO:0001111~promoter clearance from RNA polymerase II promoter       | 4  | 0.40 | 0.0143123 | FBGN0033929,  | 764 | 8   | 10996 | 7.1963 | 1         | 0.38111  | 21.1388  |
| GOTERM_CC_DIRECT | GO:0097255~R2TP complex                                             | 3  | 0.30 | 0.0160157 | FBGN0040078,  | 753 | 3   | 10026 | 13.315 | 0.998666  | 0.23263  | 20.2286  |
| GOTERM_MF_DIRECT | GO:0031208~POZ domain binding                                       | 4  | 0.40 | 0.0163137 | FBGN0026263,  | 677 | 8   | 9284  | 6.8567 | 0.999828  | 0.43891  | 21.228   |
| GOTERM_BP_DIRECT | GO:0006338~chromatin remodeling                                     | 9  | 0.91 | 0.0164512 | FBGN0015268,  | 764 | 48  |       |        |           |          |          |

|                  |                                                                        |     |       |           |               |     |      |       |        |           |         |         |
|------------------|------------------------------------------------------------------------|-----|-------|-----------|---------------|-----|------|-------|--------|-----------|---------|---------|
| GOTERM_CC_DIRECT | GO:0032039~integrator complex                                          | 5   | 0.51  | 0.0171203 | FBGN0031314,  | 753 | 14   | 10026 | 4.7553 | 0.9991583 | 0.23066 | 21.473  |
| GOTERM_CC_DIRECT | GO:0000176~nuclear exosome (RNase complex)                             | 5   | 0.51  | 0.0171203 | FBGN0034879,  | 753 | 14   | 10026 | 4.7553 | 0.9991583 | 0.23066 | 21.473  |
| GOTERM_CC_DIRECT | GO:0005838~proteasome regulatory particle                              | 6   | 0.61  | 0.0173644 | FBGN0028684,  | 753 | 21   | 10026 | 3.8042 | 0.9992398 | 0.22624 | 21.7456 |
| GOTERM_CC_DIRECT | GO:0019774~proteasome core complex, beta-subunit complex               | 4   | 0.40  | 0.0176857 | FBGN0026380,  | 753 | 8    | 10026 | 6.6574 | 0.9993352 | 0.22297 | 22.103  |
| GOTERM_MF_DIRECT | GO:0008094~DNA-dependent ATPase activity                               | 5   | 0.51  | 0.019911  | FBGN0002542,  | 677 | 15   | 9284  | 4.5711 | 0.9999751 | 0.48441 | 25.3052 |
| GOTERM_MF_DIRECT | GO:0017025~TBP-class protein binding                                   | 5   | 0.51  | 0.019911  | FBGN0036224,  | 677 | 15   | 9284  | 4.5711 | 0.9999751 | 0.48441 | 25.3052 |
| GOTERM_BP_DIRECT | GO:0051301~cell division                                               | 11  | 1.11  | 0.0200001 | FBGN0025815,  | 764 | 69   | 10996 | 2.2945 | 1         | 0.46615 | 28.3099 |
| GOTERM_BP_DIRECT | GO:0043044~ATP-dependent chromatin remodeling                          | 4   | 0.40  | 0.0203756 | FBGN0020496,  | 764 | 9    | 10996 | 6.3967 | 1         | 0.46508 | 28.7611 |
| GOTERM_BP_DIRECT | GO:0045899~positive regulation of RNA polymerase II transcriptional    | 4   | 0.40  | 0.0203756 | FBGN0036224,  | 764 | 9    | 10996 | 6.3967 | 1         | 0.46508 | 28.7611 |
| GOTERM_BP_DIRECT | GO:0010906~regulation of glucose metabolic process                     | 21  | 2.13  | 0.0209287 | FBGN0050382,  | 764 | 177  | 10996 | 1.7076 | 1         | 0.46694 | 29.4207 |
| GOTERM_BP_DIRECT | GO:0045926~negative regulation of growth                               | 5   | 0.51  | 0.0213813 | FBGN0036165,  | 764 | 16   | 10996 | 4.4977 | 1         | 0.46713 | 29.9564 |
| GOTERM_CC_DIRECT | GO:0071004~U2-type prespliceosome                                      | 5   | 0.51  | 0.0219899 | FBGN0016978,  | 753 | 15   | 10026 | 4.4382 | 0.9998902 | 0.26205 | 26.7472 |
| GOTERM_MF_DIRECT | GO:0036402~proteasome-activating ATPase activity                       | 4   | 0.40  | 0.0231653 | FBGN0036224,  | 677 | 9    | 9284  | 6.0949 | 0.9999957 | 0.51644 | 28.8237 |
| GOTERM_MF_DIRECT | GO:0000990~transcription factor activity, core RNA polymerase bindir   | 4   | 0.40  | 0.0231653 | FBGN0033929,  | 677 | 9    | 9284  | 6.0949 | 0.9999957 | 0.51644 | 28.8237 |
| GOTERM_CC_DIRECT | GO:0031597~cytosolic proteasome complex                                | 4   | 0.40  | 0.0250713 | FBGN0036224,  | 753 | 9    | 10026 | 5.9177 | 0.9999699 | 0.28525 | 29.9126 |
| GOTERM_CC_DIRECT | GO:0070604~PBAF complex                                                | 4   | 0.40  | 0.0250713 | FBGN0011715,  | 753 | 9    | 10026 | 5.9177 | 0.9999699 | 0.28525 | 29.9126 |
| GOTERM_BP_DIRECT | GO:0006342~chromatin silencing                                         | 17  | 1.72  | 0.0261004 | FBGN0003732,  | 764 | 136  | 10996 | 1.7991 | 1         | 0.52978 | 35.3178 |
| GOTERM_BP_DIRECT | GO:0045071~negative regulation of viral genome replication             | 3   | 0.30  | 0.0262597 | FBGN0033062,  | 764 | 4    | 10996 | 10.795 | 1         | 0.52481 | 35.4919 |
| GOTERM_BP_DIRECT | GO:0070816~phosphorylation of RNA polymerase II C-terminal domai       | 3   | 0.30  | 0.0262597 | FBGN0033929,  | 764 | 4    | 10996 | 10.795 | 1         | 0.52481 | 35.4919 |
| GOTERM_BP_DIRECT | GO:0032784~regulation of DNA-templated transcription, elongation       | 3   | 0.30  | 0.0262597 | FBGN0010422,  | 764 | 4    | 10996 | 10.795 | 1         | 0.52481 | 35.4919 |
| GOTERM_BP_DIRECT | GO:0000492~box C/D snoRNP assembly                                     | 3   | 0.30  | 0.0262597 | FBGN0040078,  | 764 | 4    | 10996 | 10.795 | 1         | 0.52481 | 35.4919 |
| GOTERM_BP_DIRECT | GO:0043486~histone exchange                                            | 5   | 0.51  | 0.0264626 | FBGN0000046,  | 764 | 17   | 10996 | 4.2331 | 1         | 0.52057 | 35.713  |
| GOTERM_BP_DIRECT | GO:0007517~muscle organ development                                    | 12  | 1.21  | 0.0277918 | FBGN0039039,  | 764 | 83   | 10996 | 2.0809 | 1         | 0.53128 | 37.1437 |
| GOTERM_BP_DIRECT | GO:0000381~regulation of alternative mRNA splicing, via spliceosome    | 11  | 1.11  | 0.028558  | FBGN0033378,  | 764 | 73   | 10996 | 2.1688 | 1         | 0.53432 | 37.9549 |
| GOTERM_BP_DIRECT | GO:0048813~dendrite morphogenesis                                      | 21  | 2.13  | 0.0302469 | FBGN0045852,  | 764 | 184  | 10996 | 1.6426 | 1         | 0.54848 | 39.7082 |
| GOTERM_MF_DIRECT | GO:0000339~RNA cap binding                                             | 4   | 0.40  | 0.0313354 | FBGN0039622,  | 677 | 10   | 9284  | 5.4854 | 0.9999999 | 0.60628 | 36.9885 |
| GOTERM_BP_DIRECT | GO:0045727~positive regulation of translation                          | 5   | 0.51  | 0.0322062 | FBGN0027835,  | 764 | 18   | 10996 | 3.998  | 1         | 0.56486 | 41.6839 |
| GOTERM_BP_DIRECT | GO:0006909~phagocytosis                                                | 23  | 2.33  | 0.0328186 | FBGN0053526,  | 764 | 209  | 10996 | 1.5839 | 1         | 0.56527 | 42.2888 |
| GOTERM_CC_DIRECT | GO:0071013~catalytic step 2 spliceosome                                | 17  | 1.72  | 0.0336029 | FBGN0033378,  | 753 | 130  | 10026 | 1.7412 | 0.9999992 | 0.35463 | 38.0266 |
| GOTERM_CC_DIRECT | GO:0031595~nuclear proteasome complex                                  | 4   | 0.40  | 0.0338571 | FBGN0036224,  | 753 | 10   | 10026 | 5.3259 | 0.9999993 | 0.34815 | 38.2543 |
| GOTERM_CC_DIRECT | GO:0005721~pericentric heterochromatin                                 | 4   | 0.40  | 0.0338571 | FBGN0026573,  | 753 | 10   | 10026 | 5.3259 | 0.9999993 | 0.34815 | 38.2543 |
| GOTERM_CC_DIRECT | GO:0035267~NuA4 histone acetyltransferase complex                      | 5   | 0.51  | 0.0340362 | FBGN0000046,  | 753 | 17   | 10026 | 3.9161 | 0.9999993 | 0.34136 | 38.4144 |
| GOTERM_BP_DIRECT | GO:2000134~negative regulation of G1/S transition of mitotic cell cycl | 4   | 0.40  | 0.0360752 | FBGN0001965,  | 764 | 11   | 10996 | 5.2337 | 1         | 0.5939  | 45.4079 |
| GOTERM_MF_DIRECT | GO:0046872~metal ion binding                                           | 61  | 6.17  | 0.0373969 | FBGN0039631,  | 677 | 656  | 9284  | 1.2752 | 1         | 0.65256 | 42.4731 |
| GOTERM_BP_DIRECT | GO:0051297~centrosome organization                                     | 9   | 0.91  | 0.038217  | FBGN0002914,  | 764 | 56   | 10996 | 2.3131 | 1         | 0.60907 | 47.3722 |
| GOTERM_BP_DIRECT | GO:0008283~cell proliferation                                          | 10  | 1.01  | 0.0409314 | FBGN0002914,  | 764 | 67   | 10996 | 2.1482 | 1         | 0.62852 | 49.7663 |
| GOTERM_MF_DIRECT | GO:0019843~rRNA binding                                                | 6   | 0.61  | 0.0427113 | FBGN0031419,  | 677 | 27   | 9284  | 3.0474 | 1         | 0.68342 | 46.9125 |
| GOTERM_BP_DIRECT | GO:0042752~regulation of circadian rhythm                              | 4   | 0.40  | 0.0456806 | FBGN0002413,  | 764 | 12   | 10996 | 4.7976 | 1         | 0.66359 | 53.7109 |
| GOTERM_BP_DIRECT | GO:0032007~negative regulation of TOR signaling                        | 4   | 0.40  | 0.0456806 | FBGN0016120,  | 764 | 12   | 10996 | 4.7976 | 1         | 0.66359 | 53.7109 |
| GOTERM_BP_DIRECT | GO:0048067~cuticle pigmentation                                        | 5   | 0.51  | 0.045714  | FBGN0036504,  | 764 | 20   | 10996 | 3.5982 | 1         | 0.65781 | 53.7376 |
| GOTERM_BP_DIRECT | GO:0050808~synapse organization                                        | 9   | 0.91  | 0.0457437 | FBGN0029992,  | 764 | 58   | 10996 | 2.2333 | 1         | 0.65208 | 53.7613 |
| GOTERM_BP_DIRECT | GO:0007049~cell cycle                                                  | 6   | 0.61  | 0.0470151 | FBGN0037102,  | 764 | 29   | 10996 | 2.9778 | 1         | 0.65651 | 54.7658 |
| GOTERM_MF_DIRECT | GO:0003743~translation initiation factor activity                      | 9   | 0.91  | 0.0484654 | FBGN0034654,  | 677 | 56   | 9284  | 2.2039 | 1         | 0.71255 | 51.3583 |
| GOTERM_MF_DIRECT | GO:0000981~RNA polymerase II transcription factor activity, sequenc    | 10  | 1.01  | 0.0486319 | FBGN00039169, | 677 | 66   | 9284  | 2.0778 | 1         | 0.69706 | 51.4817 |
| GOTERM_CC_DIRECT | GO:0017053~transcriptional repressor complex                           | 5   | 0.51  | 0.0492439 | FBGN0004837,  | 753 | 19   | 10026 | 3.5039 | 1         | 0.44653 | 50.6818 |
| GOTERM_MF_DIRECT | GO:0003746~translation elongation factor activity                      | 5   | 0.51  | 0.053006  | FBGN0034967,  | 677 | 20   | 9284  | 3.4284 | 1         | 0.71289 | 54.6192 |
| GOTERM_BP_DIRECT | GO:0000462~maturation of SSU-rRNA from tricistronic rRNA transcrip     | 6   | 0.61  | 0.053326  | FBGN00029755, | 764 | 30   | 10996 | 2.8785 | 1         | 0.69792 | 59.4556 |
| GOTERM_CC_DIRECT | GO:0019773~proteasome core complex, alpha-subunit complex              | 4   | 0.40  | 0.0555082 | FBGN0050382,  | 753 | 12   | 10026 | 4.4382 | 1         | 0.47816 | 55.0407 |
| GOTERM_CC_DIRECT | GO:0005719~nuclear euchromatin                                         | 4   | 0.40  | 0.0555082 | FBGN0002914,  | 753 | 12   | 10026 | 4.4382 | 1         | 0.47816 | 55.0407 |
| GOTERM_CC_DIRECT | GO:0016593~Cdc73/Paf1 complex                                          | 4   | 0.40  | 0.0555082 | FBGN0035205,  | 753 | 12   | 10026 | 4.4382 | 1         | 0.47816 | 55.0407 |
| GOTERM_CC_DIRECT | GO:0031011~Ino80 complex                                               | 4   | 0.40  | 0.0555082 | FBGN0000042,  | 753 | 12   | 10026 | 4.4382 | 1         | 0.47816 | 55.0407 |
| GOTERM_BP_DIRECT | GO:0016575~histone deacetylation                                       | 4   | 0.40  | 0.0564096 | FBGN0025825,  | 764 | 13   | 10996 | 4.4285 | 1         | 0.71315 | 61.5773 |
| GOTERM_BP_DIRECT | GO:0007283~spermatogenesis                                             | 18  | 1.82  | 0.0569926 | FBGN0016978,  | 764 | 162  | 10996 | 1.5992 | 1         | 0.71148 | 61.9665 |
| GOTERM_CC_DIRECT | GO:0005654~nucleoplasm                                                 | 18  | 1.82  | 0.0597394 | FBGN0004237,  | 753 | 151  | 10026 | 1.5872 | 1         | 0.49469 | 57.7794 |
| GOTERM_BP_DIRECT | GO:0031053~primary miRNA processing                                    | 3   | 0.30  | 0.0598172 | FBGN0033062,  | 764 | 6    | 10996 | 7.1963 | 1         | 0.72391 | 63.8003 |
| GOTERM_BP_DIRECT | GO:0006370~7-methylguanosine mRNA capping                              | 3   | 0.30  | 0.0598172 | FBGN0030556,  | 764 | 6    | 10996 | 7.1963 | 1         | 0.72391 | 63.8003 |
| GOTERM_BP_DIRECT | GO:0006260~DNA replication                                             | 8   | 0.81  | 0.0608808 | FBGN0025815,  | 764 | 51   | 10996 | 2.2577 | 1         | 0.7251  | 64.4691 |
| GOTERM_CC_DIRECT | GO:0035327~transcriptionally active chromatin                          | 6   | 0.61  | 0.0619709 | FBGN0040022,  | 753 | 29   | 10026 | 2.7548 | 1         | 0.49855 | 59.1606 |
| GOTERM_MF_DIRECT | GO:004386~helicase activity                                            | 8   | 0.81  | 0.0627129 | FBGN0023157,  | 677 | 49   | 9284  | 2.2389 | 1         | 0.7588  | 60.9195 |
| GOTERM_MF_DIRECT | GO:0016538~cyclin-dependent protein serine/threonine kinase regula     | 4   | 0.40  | 0.0634909 | FBGN0040394,  | 677 | 13   | 9284  | 4.2195 | 1         | 0.74912 | 61.3875 |
| GOTERM_MF_DIRECT | GO:0004003~ATP-dependent DNA helicase activity                         | 4   | 0.40  | 0.0634909 | FBGN0001179,  | 677 | 13   | 9284  | 4.2195 | 1         | 0.74912 | 61.3875 |
| GOTERM_BP_DIRECT | GO:0007419~ventral cord development                                    | 11  | 1.11  | 0.0647483 | FBGN00085424, | 764 | 84   | 10996 | 1.8848 | 1         | 0.74238 | 66.8043 |
| GOTERM_MF_DIRECT | GO:0043140~ATP-dependent 3'-5' DNA helicase activity                   | 3   | 0.30  | 0.0652465 | FBGN0001179,  | 677 | 6    | 9284  | 6.8567 | 1         | 0.74529 | 62.4243 |
| GOTERM_BP_DIRECT | GO:0006333~chromatin assembly or disassembly                           | 8   | 0.81  | 0.0663445 | FBGN0053904,  | 764 | 52   | 10996 | 2.2143 | 1         | 0.74615 | 67.7254 |
| GOTERM_CC_DIRECT | GO:0005685~U1 snRNP                                                    | 5   | 0.51  | 0.0676049 | FBGN0016978,  | 753 | 21   | 10026 | 3.1702 | 1         | 0.52092 | 62.4634 |
| GOTERM_CC_DIRECT | GO:0000439~core TFIIH complex                                          | 3   | 0.30  | 0.0688246 | FBGN0033929,  | 753 | 6    | 10026 | 6.6574 | 1         | 0.51853 | 63.1449 |
| GOTERM_CC_DIRECT | GO:0000307~cyclin-dependent protein kinase holoenzyme complex          | 3   | 0.30  | 0.0688246 | FBGN0040394,  | 753 | 6    | 10026 | 6.6574 | 1         | 0.51853 | 63.1449 |
| GOTERM_BP_DIRECT | GO:0008380~RNA splicing                                                | 5   | 0.51  | 0.0710056 | FBGN0033378,  | 764 | 23   | 10996 | 3.1288 | 1         | 0.76548 | 70.2796 |
| GOTERM_BP_DIRECT | GO:0007275~multicellular organism development                          | 17  | 1.72  | 0.0713303 | FBGN0010453,  | 764 | 155  | 10996 | 1.5786 | 1         | 0.76233 | 70.4503 |
| GOTERM_CC_DIRECT | GO:0005737~cytoplasm                                                   | 132 | 13.36 | 0.0723501 | FBGN0000046,  | 753 | 1553 | 10026 | 1.1317 | 1         | 0.52811 | 65.0508 |
| GOTERM_MF_DIRECT | GO:0005524~ATP binding                                                 | 66  | 6.68  | 0.0753829 | FBGN0000046,  | 677 | 751  | 9284  | 1.2052 | 1         | 0.78342 | 67.9215 |
| GOTERM_BP_DIRECT | GO:0000281~mitotic cytokinesis                                         | 9   | 0.91  | 0.0793906 | FBGN0002914,  | 764 | 65   | 10996 | 1.9928 | 1         | 0.79487 | 74.4032 |
| GOTERM_BP_DIRECT | GO:0010591~regulation of lamellipodium assembly                        | 3   | 0.30  | 0.0799734 | FBGN0000578,  | 764 | 7    | 10996 | 6.1683 | 1         | 0.79293 | 74.6689 |
| GOTERM_BP_DIRECT | GO:0045737~positive regulation of cyclin-dependent protein serine/thi  | 3   | 0.30  | 0.0799734 | FBGN0040394,  | 764 | 7    | 10996 | 6.1683 | 1         | 0.79293 | 74.6689 |
| GOTERM_BP_DIRECT | GO:0042438~melanin biosynthetic process                                | 4   | 0.40  | 0.0810283 | FBGN0033367,  | 764 | 15   | 10996 | 3.838  | 1         | 0.79301 | 75.1431 |
| GOTERM_CC_DIRECT | GO:0008540~proteasome regulatory particle, base subcomplex             | 4   | 0.40  | 0.0822138 | FBGN0036224,  | 753 | 14   | 10026 | 3.8042 | 1         | 0.5672  | 69.9081 |
| GOTERM_BP_DIRECT | GO:0007274~neuromuscular synaptic transmission                         | 9   | 0.91  | 0.0851478 | FBGN00086901, | 764 | 66   | 10996 | 1.9626 | 1         | 0.80544 | 76.9165 |
| GOTERM_CC_DIRECT | GO:0005730~nucleolus                                                   | 19  | 1.92  | 0.0861664 | FBGN0010278,  | 753 | 170  | 10026 | 1.4881 | 1         | 0.57648 | 71.6723 |
| GOTERM_MF_DIRECT | GO:0032041~NAD-dependent histone deacetylase activity (H3-K14 s        | 3   | 0.30  | 0.0870359 | FBGN0025825,  | 677 | 7    | 9284  | 5.8772 | 1         | 0.81983 | 73.3126 |
| GOTERM_BP_DIRECT | GO:0006281~DNA repair                                                  | 11  | 1.11  | 0.0880628 | FBGN0033929,  | 764 | 89   | 10996 | 1.7789 | 1         | 0.81244 | 78.0987 |
| GOTERM_BP_DIRECT | GO:0030036~actin cytoskeleton organization                             | 7   | 0.71  | 0.0889111 | FBGN0041203,  | 764 | 45   | 10996 | 2.2389 | 1         | 0.81155 | 78.4319 |
| GOTERM_MF_DIRECT | GO:0004693~cyclin-dependent protein serine/threonine kinase activity   | 4   | 0.40  | 0.0907552 | FBGN0019949,  | 677 | 15   | 9284  | 3.6569 | 1         | 0.82253 | 78.4747 |
| GOTERM_BP_DIRECT | GO:0032436~positive regulation of proteasomal ubiquitin-dependent r    | 4   | 0.40  | 0.094793  | FBGN0033669,  | 764 | 16   | 10996 | 3.5982 | 1         | 0.82837 | 80.6171 |
| GOTERM_MF_DIRECT | GO:0003705~transcription factor activity, RNA polymerase II distal enl | 8   | 0.81  | 0.0951438 | FBGN0039039,  | 677 | 54   | 9284  | 2.0316 | 1         | 0.82732 | 76.552  |

|                  |                                        |   |      |           |              |     |    |       |        |   |         |         |
|------------------|----------------------------------------|---|------|-----------|--------------|-----|----|-------|--------|---|---------|---------|
| GOTERM_MF_DIRECT | GO:0030170~pyridoxal phosphate binding | 6 | 0.61 | 0.0974964 | FBGN0000422, | 677 | 34 | 9284  | 2.42   | 1 | 0.82516 | 77.4211 |
| GOTERM_CC_DIRECT | GO:0005703~polytene chromosome puff    | 7 | 0.71 | 0.0997383 | FBGN0004237, | 753 | 43 | 10026 | 2.1675 | 1 | 0.62434 | 77.0255 |
