# Supplementary material
Source: publisher figshare collection journal article supplement (https://tandf.figshare.com/articles/dataset/_/6213614)
Supplement: Supplementary file 4 [file 3]

STable 2. *dpum* regulators

716 dsRNAs (699 genes) that increase dPum activity

| BKN#     | CG#     | Flybase_ID  | gene name                                             | human orthologs                        | FF-PRE/Ren ratio |
|----------|---------|-------------|-------------------------------------------------------|----------------------------------------|------------------|
| BKN26631 | CG9786  | FBgn0001180 | hunchback                                             | IKZF4, ZNF827, ZNF513, REST, IKZF5, ZI | 0.04             |
| BKN20079 | CG6222  | FBgn0003575 | suppressor of sable                                   | CPSF4L, ZC3H6, ZC3H8, CPSF4, ZC3H4     | 0.12             |
| BKN31766 | CG33516 | FBgn0053516 | defective proboscis extension response 3              | KIRREL2, IGSF9B, KIRREL3, LRIT3, USH   | 0.13             |
| BKN45849 | CG5726  | FBgn0034313 | -                                                     | -                                      | 0.13             |
| BKN29923 | CG33526 | FBgn0053526 | PNUTS                                                 | PRR3, PPP1R10                          | 0.13             |
| BKN29609 | CG12249 | FBgn0021776 | miranda                                               | SLMAP                                  | 0.13             |
| BKN31742 | CG9983  | FBgn0001215 | Heterogeneous nuclear ribonucleoprotein at 98DE       | DAZAP1, SLIRP, HNRNPD, HNRNPA1L2,      | 0.13             |
| BKN29705 | CG7843  | FBgn0033062 | Arsenic resistance protein 2                          | SRRT                                   | 0.16             |
| BKN21707 | CG9753  | FBgn0039747 | Adenosine receptor                                    | ADORA1, GPBAR1, ADORA2A, ADORA2I       | 0.17             |
| BKN21880 | CG32435 | FBgn0021760 | chromosome bows                                       | CLASP1, CLASP2                         | 0.18             |
| BKN20625 | CG33106 | FBgn0043884 | multiple ankyrin repeats single KH domain             | ANKRD17, ANKRD22, ANKHD1-EIF4EBP.      | 0.19             |
| BKN28162 | CG12749 | FBgn0004237 | Heterogeneous nuclear ribonucleoprotein at 87F        | MSI1, HNRNPA1L2, DAZAP1, SRSF10, B     | 0.20             |
| BKN29801 | CG13941 | FBgn0033928 | Arc2                                                  | OARD1, ARC                             | 0.21             |
| BKN20175 | CG7340  | FBgn0040493 | granny smith                                          | LAP3, NPEPL1                           | 0.21             |
| BKN27983 | CG15218 | FBgn0025674 | Cyclin K                                              | CCNT1, FAM58A, CCNK, CCNT2             | 0.21             |
| BKN21793 | CG7597  | FBgn0037093 | Cyclin-dependent kinase 12                            | CDK9, CDK12, CDK13                     | 0.22             |
| BKN20274 | CG5520  | FBgn0039562 | Glycoprotein 93                                       | HSP90AB1, HSP90AA1, HSP90B1            | 0.22             |
| BKN28019 | CG1770  | FBgn0041210 | Histone deacetylase 4                                 | HDAC10, HDAC5, HDAC7, HDAC9, HDAC      | 0.22             |
| BKN31529 | CG12767 | FBgn0040465 | Dorsal interacting protein 3                          | -                                      | 0.23             |
| BKN26940 | CG14543 | FBgn0039404 | -                                                     | TSR2                                   | 0.23             |
| BKN29305 | CG10674 | FBgn0035592 | -                                                     | WDR83OS                                | 0.24             |
| BKN23854 | CG32816 | FBgn0052816 | -                                                     | -                                      | 0.24             |
| BKN21601 | CG3497  | FBgn0004837 | Suppressor of Hairless                                | RBPJ, RBPJL                            | 0.24             |
| BKN45044 | CG10281 | FBgn0010282 | Transcription factor IIFalpha                         | GTF2F1                                 | 0.26             |
| BKN31453 | CG7423  | FBgn0030982 | -                                                     | ANKRD7, ASB12, LUZP6, MTPN             | 0.26             |
| BKN45759 | CG6538  | FBgn0010421 | Transcription factor TFIIFbeta                        | GTF2F2                                 | 0.26             |
| BKN21840 | CG10907 | FBgn0036207 | -                                                     | CWC27                                  | 0.26             |
| BKN23604 | CG7347  | FBgn0002901 | mutagen-sensitive 304                                 | ATRIP                                  | 0.27             |
| BKN45175 | CG2669  | FBgn0086695 | humpty dumpty                                         | DONSON, ATP5O                          | 0.27             |
| BKN21346 | CG17293 | FBgn0032030 | WD repeat domain 82                                   | TWF2, TLR9, TWF1, WDR82                | 0.27             |
| BKN30230 | CG2129  | FBgn0030008 | -                                                     | ZNF775, ZNF276, ZBTB43, ZNF653, ZSC/   | 0.28             |
| BKN20728 | CG2253  | FBgn0029992 | Upf2                                                  | UPF2                                   | 0.28             |
| BKN20738 | CG7082  | FBgn0031401 | papi                                                  | TDRD15, TDRD1, TDRKH, AKAP1, TDRD      | 0.29             |
| BKN29127 | CG11246 | FBgn0037121 | Rpb8                                                  | POLR2H                                 | 0.30             |
| BKN27394 | CG9170  | FBgn0030716 | -                                                     | CEP164                                 | 0.31             |
| BKN23549 | CG3893  | FBgn0036826 | asterix                                               | GTSF1L, GTSF1                          | 0.31             |
| BKN24073 | CG32375 | FBgn0085445 | Ankyrin 2                                             | ANKRD65, TNKS, ANK3, ANKRD60, ANK:     | 0.31             |
| BKN46476 | CG5193  | FBgn0004915 | Transcription factor IIB                              | GTF2B                                  | 0.31             |
| BKN20359 | CG11979 | FBgn0033571 | Rpb5                                                  | POLR2E                                 | 0.32             |
| BKN46237 | CG4746  | FBgn0029003 | mab-21                                                | MAB21L1, MAB21L3, MB21D1, C2orf54, T   | 0.32             |
| BKN20068 | CG9750  | FBgn0040075 | reptin                                                | RUVBL2, RUVBL1, SCCPDH                 | 0.32             |
| BKN20892 | CG7035  | FBgn0022942 | cap binding protein 80                                | NCBP1                                  | 0.32             |
| BKN29729 | CG1397  | FBgn0030275 | retroactive                                           | -                                      | 0.32             |
| BKN29051 | CG3279  | FBgn0035156 | Vesicle transport through interaction with t-SNAREs 1 | VTI1B, VTI1A                           | 0.33             |
| BKN45546 | CG31390 | FBgn0051390 | Mediator complex subunit 7                            | MED7                                   | 0.33             |
| BKN27339 | CG31390 | FBgn0051390 | Mediator complex subunit 7                            | MED7                                   | 0.33             |
| BKN28067 | CG8611  | FBgn0027602 | -                                                     | DDX31                                  | 0.33             |
| BKN21235 | CG1793  | FBgn0039923 | Mediator complex subunit 26                           | TCEA3, TCEA2, TCEA1, TCEANC, MED2I     | 0.33             |
| BKN27645 | CG6647  | FBgn0004363 | porin                                                 | VDAC1, VDAC2, VDAC3                    | 0.33             |
| BKN31280 | CG17763 | FBgn0250904 | -                                                     | MYL1, MYL6, MYL6B, MYL4, MYL3          | 0.34             |
| BKN28886 | CG10601 | FBgn0014343 | mirror                                                | TGIF2-C20orf24, MKX, MEIS2, TGIF2LX, I | 0.34             |
| BKN25495 | CG3814  | FBgn0025692 | Lifeguard                                             | FAIM2, TMBIM1, TMBIM4, GRINA           | 0.34             |
| BKN27045 | CG31757 | FBgn0259225 | Phosphodiesterase 1c                                  | PDE1A, PDE1B, PDE1C                    | 0.34             |
| BKN27827 | CG13867 | FBgn0034503 | Mediator complex subunit 8                            | MED8                                   | 0.34             |
| BKN20996 | CG4976  | FBgn0039559 | Nuclear receptor binding SET domain protein           | KMT2C, NSD1, SETD1B, ASH1L, PHF20,     | 0.34             |
| BKN28331 | CG6391  | FBgn0036111 | Aps                                                   | NUDT11, NUDT3, NUDT4, NUDT10           | 0.34             |

|          |          |             |                                     |                                      |      |
|----------|----------|-------------|-------------------------------------|--------------------------------------|------|
| BKN20743 | CG6761   | FBgn0036031 | -                                   | KIAA1841                             | 0.34 |
| BKN29448 | CG12357  | FBgn0022943 | cap binding protein 20              | NCBP2                                | 0.34 |
| BKN27357 | CG6948   | FBgn0024814 | Clathrin light chain                | CLTB, CLTA                           | 0.34 |
| BKN42698 | CR33736  | FBgn0053736 | snmRNA:430:CR33736                  | -                                    | 0.35 |
| BKN24095 | CG1433   | FBgn0019637 | Another transcription unit          | LEO1                                 | 0.35 |
| BKN22945 | CG1245   | FBgn0037359 | Mediator complex subunit 27         | MED27                                | 0.35 |
| BKN29118 | CG13628  | FBgn0039218 | Rpb10                               | POLR2L                               | 0.35 |
| BKN22183 | CG8954   | FBgn0019890 | Smg5                                | SMG5, SMG7                           | 0.35 |
| BKN22349 | CG5193   | FBgn0004915 | Transcription factor IIB            | GTF2B                                | 0.35 |
| BKN22010 | CG9473   | FBgn0024330 | Mediator complex subunit 6          | MED6                                 | 0.35 |
| BKN29078 | CG11184  | FBgn0034923 | Upf3                                | UPF3B, UPF3A                         | 0.35 |
| BKN40707 | CG17397  | FBgn0040020 | Mediator complex subunit 21         | MED21                                | 0.35 |
| BKN29031 | CG5543   | FBgn0034908 | -                                   | WDR70                                | 0.36 |
| BKN22748 | CG3710   | FBgn0010422 | RNA polymerase II elongation factor | MED26, TCEANC2, TCEA3, TCEA2, TCE/   | 0.36 |
| BKN25376 | CG7172   | FBgn0037102 | CR6-interacting factor              | GADD45GIP1                           | 0.36 |
| BKN26823 | CG1421   | FBgn0032966 | -                                   | -                                    | 0.36 |
| BKN28041 | CG11981  | FBgn0026380 | Proteasome beta3 subunit            | PSMB3                                | 0.37 |
| BKN20511 | CG8487   | FBgn0033714 | gartenzwerg                         | GBF1, NCF4                           | 0.37 |
| BKN41369 | CG45782  | FBgn0069947 | -                                   | SLC45A4, SLC45A2, SLC45A1, SLC45A3   | 0.37 |
| BKN21393 | CG9431   | FBgn0032484 | kekkon4                             | ASPN, TPBG, LRRC26, SLITRK5, OMD, A  | 0.37 |
| BKN21474 | CG5923   | FBgn0005696 | DNA polymerase alpha 73kD           | POLA2                                | 0.37 |
| BKN23064 | CG9494   | FBgn0032074 | Tetraspanin 29Fa                    | TSPAN7, CD151, TSPAN6, CD63, TSPAN   | 0.37 |
| BKN31525 | CG13055  | FBgn0036583 | -                                   | -                                    | 0.37 |
| BKN28341 | CG32579  | FBgn0052579 | -                                   | XKR8, XKR5, XKR6, XKR7, XKR4, XKR9   | 0.38 |
| BKN21199 | CG4003   | FBgn0040078 | pontin                              | RUVBL2, SCCPDH, RUVBL1               | 0.38 |
| BKN33278 | CG9163   | FBgn0259110 | mind-meld                           | ADAM8, ADAM19, ADAMDEC1, ADAM11,     | 0.38 |
| BKN20442 | CG8610   | FBgn0012058 | Cell division cycle 27              | CDC27, TTC37                         | 0.38 |
| BKN24191 | CG6071   | FBgn0036186 | -                                   | ANPEP, ERAP1, ENPEP, ERAP2, TRHDE    | 0.38 |
| BKN27744 | CG5057   | FBgn0036581 | Mediator complex subunit 10         | MED10                                | 0.38 |
| BKN27400 | CG15010  | FBgn0041171 | archipelago                         | DAW1, BTRC, TRAF7, FBXW11, FBXW7     | 0.38 |
| BKN46549 | CG5057   | FBgn0036581 | Mediator complex subunit 10         | MED10                                | 0.38 |
| BKN33859 | HDC03660 | -           | -                                   | -                                    | 0.39 |
| BKN27828 | CG1559   | FBgn0030354 | Upf1                                | ZGRF1, UPF1                          | 0.39 |
| BKN45246 | CG18398  | FBgn0032728 | Transport and Golgi organization 6  | TANGO6                               | 0.39 |
| BKN29165 | CG15929  | FBgn0029800 | lin-52                              | LIN52                                | 0.39 |
| BKN30897 | CG17575  | FBgn0250842 | -                                   | CRISP1, GLIPR2, CRISPLD2, P116, CLEC | 0.39 |
| BKN26681 | CG18398  | FBgn0032728 | Transport and Golgi organization 6  | TANGO6                               | 0.40 |
| BKN41948 | CG34186  | FBgn0085215 | Rpb12                               | POLR2K                               | 0.40 |
| BKN20763 | CG11115  | FBgn0037202 | Suppressor of stem-loop mutation    | GTF2H2C_2, GTF2H2C, GTF2H2           | 0.40 |
| BKN27092 | CG11125  | FBgn0033174 | -                                   | ENKD1                                | 0.40 |
| BKN41517 | CG11430  | FBgn0041585 | olf186-F                            | ORAI2, ORAI3, ORAI1                  | 0.40 |
| BKN27693 | CG7885   | FBgn0026373 | RNA polymerase II 33kD subunit      | POLR2C                               | 0.40 |
| BKN46590 | CG15155  | FBgn0032669 | -                                   | GLYATL3                              | 0.40 |
| BKN27914 | CG31155  | FBgn0051155 | Rpb7                                | POLR2G                               | 0.40 |
| BKN27453 | CG1163   | FBgn0003275 | RNA polymerase II 18kD subunit      | POLR2F                               | 0.41 |
| BKN22798 | CG12031  | FBgn0035145 | Mediator complex subunit 14         | MED14                                | 0.41 |
| BKN28221 | CG1276   | FBgn0015829 | Transcription factor IIEbeta        | GTF2E2                               | 0.41 |
| BKN28214 | CG10938  | FBgn0016697 | Proteasome alpha5 subunit           | PSMA8, PSMA5, PSMA2, PSMA7           | 0.41 |
| BKN30058 | CG17932  | FBgn0040260 | Ugt36Bc                             | UGT3A2, UGT2A3, UGT1A8, UGT1A3, UC   | 0.41 |
| BKN20479 | CG6369   | FBgn0039260 | Smg6                                | SMG6, SWT1                           | 0.41 |
| BKN42043 | CG18816  | FBgn0042086 | Tetraspanin 42Eb                    | CD63                                 | 0.42 |
| BKN21171 | CG11990  | FBgn0037657 | hyrax                               | CDC73                                | 0.42 |
| BKN20571 | CG6331   | FBgn0019952 | Organic cation transporter          | SLC22A7, SLC22A13, SLC22A8, SLC22A/  | 0.42 |
| BKN27263 | CG14714  | FBgn0259227 | -                                   | PTPRC, PTPN23, PTPN2, PTPN7, PTPRC   | 0.42 |
| BKN33257 | CG14340  | FBgn0031302 | -                                   | RGS9BP, RGS7BP                       | 0.42 |
| BKN23028 | CG6325   | FBgn0037814 | -                                   | DCAF15                               | 0.42 |
| BKN23929 | CG3773   | FBgn0038692 | -                                   | GCOM1, POLR2M                        | 0.42 |
| BKN31369 | CG33520  | FBgn0053520 | transcriptional Adaptor 2a          | TADA2A, POLR2D, TADA2B               | 0.42 |
| BKN21812 | CG14043  | FBgn0031659 | -                                   | KIF1BP                               | 0.42 |
| BKN28878 | CG6066   | FBgn0039488 | -                                   | NKAP, NKAPL                          | 0.42 |
| BKN32668 | CG33335  | FBgn0053335 | -                                   | -                                    | 0.42 |
| BKN20467 | CG9518   | FBgn0030590 | -                                   | CHDH                                 | 0.43 |

|          |          |             |                                          |                                        |      |
|----------|----------|-------------|------------------------------------------|----------------------------------------|------|
| BKN41161 | CG33667  | FBgn0053667 | -                                        | -                                      | 0.43 |
| BKN41361 | CR32272  | FBgn0052272 | transfer RNA:Lysine-CTT 1-13             | -                                      | 0.43 |
| BKN24046 | CG7031   | FBgn0039027 | -                                        | GGN, TPRX1                             | 0.43 |
| BKN41466 | CG33998  | FBgn0053998 | -                                        | -                                      | 0.43 |
| BKN20457 | CG8625   | FBgn0011604 | Imitation SWI                            | SMARCA1, SMARCA5, CHD1L                | 0.43 |
| BKN20417 | CG4067   | FBgn0020385 | pugilist                                 | MTHFD2L, MTHFD2, MTHFD1, MTHFD1L       | 0.43 |
| BKN20166 | CG9383   | FBgn0029094 | anti-silencing factor 1                  | ASF1A, ASF1B                           | 0.44 |
| BKN41323 | CG33829  | FBgn0053829 | His2A:CG33829                            | H2AFJ, H2AFY2, HIST2H2AA3, HIST1H2F    | 0.44 |
| BKN40320 | CG30382  | FBgn0050382 | -                                        | PSMA6                                  | 0.44 |
| BKN20659 | CG4152   | FBgn0001986 | Mtr4 helicase                            | SKIV2L2, SKIV2L, DDX60L                | 0.44 |
| BKN30375 | CG7592   | FBgn0039685 | Odorant-binding protein 99b              | -                                      | 0.44 |
| BKN45004 | CG2684   | FBgn0002542 | Iodestar                                 | TTF2, HLTf                             | 0.44 |
| BKN24933 | CG1738   | FBgn0030291 | -                                        | C1orf131                               | 0.44 |
| BKN23026 | CG4236   | FBgn0015610 | Chromatin assembly factor 1, p55 subunit | WDR59, WDR73, RBBP7, RBBP4             | 0.44 |
| BKN20755 | CG1250   | FBgn0037357 | Secretory 23                             | SEC23B, SEC23A                         | 0.44 |
| BKN22958 | CG3735   | FBgn0034933 | -                                        | DIEXF                                  | 0.44 |
| BKN21334 | CG8151   | FBgn0033929 | Transcription factor B1                  | GTF2H1                                 | 0.44 |
| BKN42716 | CR33742  | FBgn0053742 | snmRNA:430:CR33742                       | -                                      | 0.44 |
| BKN34310 | HDC17124 | -           | -                                        | -                                      | 0.44 |
| BKN20461 | CG32743  | FBgn0052743 | no-on-and-no-off transient C             | BOLA2-SMG1P6, BOLA2B, BOLA2, PRKC      | 0.44 |
| BKN22002 | CG10582  | FBgn0028402 | Sex-lethal interactor                    | LOC101060521, POLR3E                   | 0.44 |
| BKN22538 | CG3376   | FBgn0034997 | -                                        | SMPDL3B, SMPDL3A, SMPD1                | 0.45 |
| BKN22413 | CG12173  | FBgn0037305 | -                                        | ENOPH1                                 | 0.45 |
| BKN41731 | CG41433  | FBgn0084000 | -                                        | -                                      | 0.45 |
| BKN41259 | CG34235  | FBgn0085264 | -                                        | -                                      | 0.45 |
| BKN24577 | CG4824   | FBgn0000182 | Bicaudal C                               | ANKS6, HDLBP, BICC1                    | 0.45 |
| BKN30372 | CG14627  | FBgn0040361 | -                                        | -                                      | 0.45 |
| BKN23794 | CG17063  | FBgn0027107 | Innexin 6                                | -                                      | 0.45 |
| BKN22670 | CG8392   | FBgn0010590 | Proteasome beta1 subunit                 | PSMB9, PSMB6                           | 0.45 |
| BKN21140 | CG5790   | FBgn0032677 | -                                        | CDC7                                   | 0.45 |
| BKN41830 | CG12029  | FBgn0035454 | dendritic arbor reduction 1              | KLF1, KLF16, KLF2, SP5, KLF10, SP1, ZN | 0.45 |
| BKN27592 | CG8445   | FBgn0034088 | calypso                                  | BAP1, UCHL5                            | 0.45 |
| BKN46221 | CG11981  | FBgn0026380 | Proteasome beta3 subunit                 | PSMB3                                  | 0.45 |
| BKN45327 | CG17917  | FBgn0037431 | -                                        | PEBP1, MRPL38, PEBP4                   | 0.46 |
| BKN23071 | CG14366  | FBgn0085412 | -                                        | CNKSR1, PPP1R9A, PPP1R9B, PLEKHA4      | 0.46 |
| BKN22426 | CG4351   | FBgn0030448 | -                                        | CHPF2, CHPF                            | 0.46 |
| BKN21295 | CG31871  | FBgn0051871 | -                                        | LIPK, LIPA, LIPN, LIPJ, LIPM, LIPF     | 0.46 |
| BKN31003 | CG11105  | FBgn0030281 | -                                        | RCVRN, KCNIP1, USP32, KCNIP3, KCNIF    | 0.46 |
| BKN42723 | CR33745  | FBgn0053745 | snmRNA:430:CR33745                       | -                                      | 0.46 |
| BKN46436 | CG16753  | FBgn0035393 | -                                        | FAM207A                                | 0.46 |
| BKN24170 | CG30049  | FBgn0050049 | -                                        | ERMP1                                  | 0.46 |
| BKN22409 | CG10682  | FBgn0027936 | vihar                                    | UBE2U, UBE2C                           | 0.46 |
| BKN21396 | CG13626  | FBgn0039212 | Syntaxin 18                              | STX18                                  | 0.46 |
| BKN27575 | CG12212  | FBgn0003053 | pebbled                                  | ZNF217, ZNF821, ZNF536, RREB1, ZBTB    | 0.46 |
| BKN41636 | CG2048   | FBgn0002413 | discs overgrown                          | VRK1, TTBK1, CSNK1E, VRK2, CSNK1D,     | 0.47 |
| BKN29858 | CG11145  | FBgn0033168 | -                                        | -                                      | 0.47 |
| BKN22509 | CG10565  | FBgn0037051 | -                                        | DNAJB4, DNAJC2                         | 0.47 |
| BKN28462 | CG13316  | FBgn0023215 | Mnt                                      | MNT, MXI1, MXD3                        | 0.47 |
| BKN27924 | CG6474   | FBgn0000617 | enhancer of yellow 1                     | TAF9, TAF9B                            | 0.47 |
| BKN22317 | CG30359  | FBgn0050359 | Maltase A5                               | SLC3A1, SLC3A2                         | 0.47 |
| BKN27287 | CG17999  | FBgn0034552 | -                                        | ACSF3, ACSBG1, AACS                    | 0.47 |
| BKN23035 | CG5514   | FBgn0039560 | Biorientation Defective 1                | BOD1, BOD1L2, BOD1L1                   | 0.47 |
| BKN31868 | CG8881   | FBgn0026176 | SKP1-related B                           | SKP1                                   | 0.47 |
| BKN31307 | CG4843   | FBgn0004117 | Tropomyosin 2                            | TPM3, TPM4, TPM1, TPM2                 | 0.47 |
| BKN45942 | CG11184  | FBgn0034923 | Upf3                                     | UPF3B, UPF3A                           | 0.47 |
| BKN46429 | CR31845  | FBgn0051845 | -                                        | -                                      | 0.47 |
| BKN46472 | CG3710   | FBgn0010422 | RNA polymerase II elongation factor      | MED26, TCEANC2, TCEA3, TCEA2, TCEA1    | 0.47 |
| BKN29138 | CG6840   | FBgn0032634 | Rpb11                                    | POLR2J2, POLR2J, POLR2J3               | 0.47 |
| BKN27226 | CG31829  | FBgn0051829 | Cullin 3                                 | CUL4A, CUL3, CACUL1, CUL4B             | 0.47 |
| BKN28126 | CG8156   | FBgn0013750 | ADP ribosylation factor at 51F           | ARL11, ARF6, ARL15                     | 0.48 |
| BKN40065 | CG40844  | FBgn0085524 | -                                        | -                                      | 0.48 |
| BKN21933 | CG8912   | FBgn0014870 | P-element somatic inhibitor              | FUBP1, FUBP3, KHSRP                    | 0.48 |

|          |          |             |                                                           |                                       |      |
|----------|----------|-------------|-----------------------------------------------------------|---------------------------------------|------|
| BKN20492 | CG1886   | FBgn0030343 | ATP7                                                      | ATP7B, ATP7A                          | 0.48 |
| BKN23761 | CG3515   | FBgn0031431 | -                                                         | WDR82                                 | 0.48 |
| BKN27040 | CG12763  | FBgn0004240 | Diptericin A                                              | -                                     | 0.48 |
| BKN30760 | CG10488  | FBgn0000625 | eyegone                                                   | PAX3, DUX4, PAX6, PAX7, DUXA, MIXL1,  | 0.48 |
| BKN46390 | CG6884   | FBgn0036811 | Mediator complex subunit 11                               | MED11                                 | 0.48 |
| BKN20586 | CG16903  | FBgn0040394 | -                                                         | CCNL2, CCNL1                          | 0.48 |
| BKN28922 | CG6593   | FBgn0003134 | Protein phosphatase 1alpha at 96A                         | PPP1CB, PPP1CA, PPP1CC                | 0.48 |
| BKN26226 | CG9797   | FBgn0037621 | Motif 1 Binding Protein                                   | ZNF98, ZNF485, ZNF784, ZNF28, ZNF85C  | 0.48 |
| BKN29435 | CG6814   | FBgn0020407 | asunder                                                   | ASUN                                  | 0.48 |
| BKN28385 | CG10315  | FBgn0034858 | eukaryotic translation initiation factor 2B subunit delta | EIF2B4                                | 0.48 |
| BKN46538 | CG10523  | FBgn0041100 | parkin                                                    | PARK2                                 | 0.48 |
| BKN26385 | CG14712  | FBgn0037924 | -                                                         | POM121L2, POM121, NUP153, POM121C     | 0.48 |
| BKN26720 | CG3363   | FBgn0034987 | over compensating males                                   | TBX10, TBX1                           | 0.48 |
| BKN22908 | CG4785   | FBgn0031314 | Integrator 14                                             | DNAJC2, VWA9                          | 0.48 |
| BKN28002 | CG9327   | FBgn0003150 | Proteasome alpha3 subunit                                 | PSMB3, PSMA4                          | 0.48 |
| BKN27100 | CG1464   | FBgn0005558 | eyeless                                                   | PITX3, PAX6, SHOX, LPXN, PDLIM3, HO   | 0.48 |
| BKN21658 | CG2259   | FBgn0040319 | Glutamate-cysteine ligase catalytic subunit               | GCLC                                  | 0.48 |
| BKN32455 | CG13845  | FBgn0085405 | -                                                         | NACC1, NACC2, ZBTB9                   | 0.48 |
| BKN25009 | CG14352  | FBgn0031351 | -                                                         | -                                     | 0.49 |
| BKN28276 | CG10415  | FBgn0015828 | Transcription factor IIealpha                             | GTF2E1                                | 0.49 |
| BKN40299 | CG18495  | FBgn0026781 | Proteasome alpha1 subunit                                 | PSMA6                                 | 0.49 |
| BKN41307 | CG33817  | FBgn0053817 | His2A:CG33817                                             | HIST1H2AK, H2AFB3, H2AFB1, HIST2H2,   | 0.49 |
| BKN28068 | CG7564   | FBgn0036734 | -                                                         | LUC7L2, LUC7L3, LUC7L                 | 0.49 |
| BKN21317 | CG18780  | FBgn0013531 | Mediator complex subunit 20                               | MED20                                 | 0.49 |
| BKN22076 | CG32654  | FBgn0052654 | Secretory 16                                              | SEC16B, SEC16A                        | 0.49 |
| BKN28881 | CG4817   | FBgn0010278 | Structure specific recognition protein                    | SSRP1                                 | 0.49 |
| BKN28018 | CG14981  | FBgn0035473 | maggie                                                    | TOMM22                                | 0.49 |
| BKN23042 | CG9109   | FBgn0031765 | -                                                         | B3GLCT                                | 0.49 |
| BKN28870 | CG6476   | FBgn0003600 | Suppressor of variegation 3-9                             | EHMT2, EHMT1, SUV39H1, SUV39H2, SE    | 0.49 |
| BKN28397 | CG6884   | FBgn0036811 | Mediator complex subunit 11                               | MED11                                 | 0.49 |
| BKN40049 | CG40351  | FBgn0040022 | SET domain containing 1                                   | KMT2D, WHSC1L1, DIDO1, SETD2, SETI    | 0.49 |
| BKN25766 | CG5418   | FBgn0032436 | -                                                         | -                                     | 0.49 |
| BKN41177 | CG33873  | FBgn0053873 | His4:CG33873                                              | HIST2H4B, HIST1H4A, HIST1H4E, HIST1   | 0.49 |
| BKN45015 | CG4173   | FBgn0014029 | Septin 2                                                  | SEPT9, SEPT12, SEPT5, SEPT4, SEPT1C   | 0.50 |
| BKN20682 | CG6238   | FBgn0029157 | slingshot                                                 | DUSP26, DUSP2, DUPD1, STYX, DUSP2;    | 0.50 |
| BKN22139 | CG6538   | FBgn0010421 | Transcription factor TFIIFbeta                            | GTF2F2                                | 0.50 |
| BKN33475 | HDC07387 | -           | -                                                         | -                                     | 0.50 |
| BKN31132 | CG5151   | FBgn0036576 | -                                                         | LDLRAD4                               | 0.50 |
| BKN42696 | CR33727  | FBgn0053727 | snmRNA:430:CR33727                                        | -                                     | 0.50 |
| BKN34337 | HDC05416 | -           | -                                                         | -                                     | 0.50 |
| BKN20488 | CG17054  | FBgn0259876 | Chromosome associated protein G                           | NCAPG                                 | 0.50 |
| BKN41212 | CG33890  | FBgn0053890 | His2B:CG33890                                             | HIST1H2BL, HIST2H2BE, HIST1H2BD, HI   | 0.50 |
| BKN20863 | CG9045   | FBgn0002914 | Myb oncogene-like                                         | MYBL1, DMTF1, MYB, SNAPC4, MYBL2      | 0.50 |
| BKN20912 | CG8019   | FBgn0001179 | haywire                                                   | ERCC3                                 | 0.50 |
| BKN29074 | CG10377  | FBgn0004838 | Heterogeneous nuclear ribonucleoprotein at 27C            | HNRNPA3, HNRNPA0, HNRNPA2B1, HNF      | 0.50 |
| BKN22437 | CG8464   | FBgn0038233 | HTRA2-related serine protease                             | HTRA1, NAGK, HTRA2, HTRA3, HTRA4, T   | 0.50 |
| BKN33743 | HDC15018 | -           | -                                                         | -                                     | 0.50 |
| BKN22921 | CG5546   | FBgn0036761 | Mediator complex subunit 19                               | MED19                                 | 0.50 |
| BKN27733 | CG13671  | FBgn0035867 | -                                                         | PDIA2, PDIA3, TXNDC11, PDIA4, P4HB    | 0.50 |
| BKN25466 | CG15800  | FBgn0034904 | -                                                         | SKP1                                  | 0.50 |
| BKN21853 | CG9537   | FBgn0031820 | Daxx-like protein                                         | DAXX                                  | 0.50 |
| BKN24305 | CG8213   | FBgn0033359 | -                                                         | HABP2, F12, HGF, CTCR, CELA1, CELA2   | 0.50 |
| BKN26863 | CG13942  | FBgn0085408 | Shroom                                                    | SHROOM2, SHROOM1, SHROOM3, SHR        | 0.50 |
| BKN30994 | CG15247  | FBgn0030156 | -                                                         | -                                     | 0.51 |
| BKN45008 | CG5949   | FBgn0012066 | DNA-polymerase-delta                                      | POLD1, REV3L                          | 0.51 |
| BKN45506 | CG5954   | FBgn0002441 | lethal (3) malignant brain tumor                          | L3MBTL4, SAMD1, SCML1, L3MBTL3, L3    | 0.51 |
| BKN20729 | CG30085  | FBgn0050085 | Rap1 interacting factor 1                                 | RIF1                                  | 0.51 |
| BKN31013 | CG5134   | FBgn0260401 | Mediator complex subunit 9                                | MED9                                  | 0.51 |
| BKN45406 | CG11176  | FBgn0030503 | Transport and Golgi organization 2                        | TANGO2                                | 0.51 |
| BKN41298 | CG43161  | FBgn0037820 | Skeletor                                                  | THBD                                  | 0.51 |
| BKN24385 | CG9985   | FBgn0016984 | skittles                                                  | PIP5K1B, PIP5K1A, PIP4K2C, PIP5KL1, F | 0.51 |
| BKN34093 | HDC06513 | FBgn0085215 | -                                                         | -                                     | 0.51 |

|          |         |             |                                                      |                                         |      |
|----------|---------|-------------|------------------------------------------------------|-----------------------------------------|------|
| BKN27586 | CG8843  | FBgn0031537 | Secretory 5                                          | EXOC2                                   | 0.51 |
| BKN29324 | CG18174 | FBgn0028694 | Regulatory particle non-ATPase 11                    | PSMD14, MPND, BRCC3, MYSM1              | 0.51 |
| BKN41519 | CG16988 | FBgn0040291 | Regulator of cullins 1b                              | RBX1, RNF7                              | 0.51 |
| BKN40893 | CG34000 | FBgn0054000 | -                                                    | -                                       | 0.51 |
| BKN42699 | CR33740 | FBgn0053740 | snmRNA:430:CR33740                                   | -                                       | 0.51 |
| BKN31335 | CG12362 | FBgn0036082 | -                                                    | CUL7, RNF19B, ARIH2, RNF31, ANKIB1,     | 0.52 |
| BKN28401 | CG7583  | FBgn0020496 | C-terminal Binding Protein                           | CTBP2, CTBP1, PHGDH                     | 0.52 |
| BKN30278 | CG12387 | FBgn0011556 | zetaTrypsin                                          | PRSS53, HPN, PRSS36, PRSS48             | 0.52 |
| BKN45035 | CG17139 | FBgn0260454 | -                                                    | VDAC1, VDAC2, VDAC3                     | 0.52 |
| BKN20759 | CG31063 | FBgn0051063 | -                                                    | NUDT14                                  | 0.52 |
| BKN29817 | CG1999  | FBgn0029947 | -                                                    | -                                       | 0.52 |
| BKN41327 | CG33841 | FBgn0053841 | His2A:CG33841                                        | HIST1H2AI, HIST1H2AG, H2AFJ, HIST1H     | 0.52 |
| BKN23525 | CG11821 | FBgn0038680 | Cyp12a5                                              | CYP24A1, CYP11B1, CYP27A1, CYP11A       | 0.52 |
| BKN27849 | CG4677  | FBgn0039039 | lame duck                                            | GLI1, GLIS1, GLI2, AAAS, GLIS3, GLI3, G | 0.52 |
| BKN20176 | CG2503  | FBgn0010750 | antimeros                                            | BBS5, PAF1, KLHL40                      | 0.52 |
| BKN22581 | CG3727  | FBgn0010583 | dreadlocks                                           | NCK2, NCK1                              | 0.52 |
| BKN42713 | CR33739 | FBgn0053739 | snmRNA:430:CR33739                                   | -                                       | 0.52 |
| BKN24741 | CG1644  | FBgn0031182 | Cyp6t1                                               | CYP3A5, CYP3A4, CYP3A7-CYP3A51P, C      | 0.52 |
| BKN20281 | CG12225 | FBgn0028982 | Spt6                                                 | SUPT6H                                  | 0.52 |
| BKN22369 | CG8641  | FBgn0035733 | -                                                    | RERGL, DIRAS3, RALB, RAP2A, KRAS, F     | 0.52 |
| BKN23635 | CG8981  | FBgn0260792 | Microcephalin                                        | MCPH1, BARD1                            | 0.52 |
| BKN27322 | CG8749  | FBgn0016978 | small ribonucleoprotein particle U1 subunit 70K      | RBM24, SNRNP35, SNRNP70                 | 0.52 |
| BKN41231 | CG33904 | FBgn0053904 | His2B:CG33904                                        | HIST1H2BG, HIST1H2BF, HIST1H2BA, HI     | 0.52 |
| BKN30946 | CG7917  | FBgn0016685 | Nucleoplasmin                                        | NPM1, NPM2, NPM3                        | 0.52 |
| BKN31856 | CG14821 | FBgn0035719 | target of wingless                                   | C1orf21                                 | 0.53 |
| BKN27273 | CG15631 | FBgn0031626 | -                                                    | -                                       | 0.53 |
| BKN30209 | CG3857  | FBgn0023520 | -                                                    | SMG9                                    | 0.53 |
| BKN31271 | CG31157 | FBgn0051157 | -                                                    | TMEM135                                 | 0.53 |
| BKN25853 | CG9733  | FBgn0039759 | -                                                    | -                                       | 0.53 |
| BKN30340 | CG15186 | FBgn0037448 | -                                                    | -                                       | 0.53 |
| BKN20724 | CG10480 | FBgn0002638 | Regulator of chromosome condensation 1               | SERGEF, NEK9, RCC1, RCC1L, RCBTB1       | 0.53 |
| BKN27711 | CG8597  | FBgn0011640 | lark                                                 | RBM4B, ADK, RBM14-RBM4, HNRNPCL1        | 0.53 |
| BKN42004 | CG14421 | FBgn0029644 | -                                                    | -                                       | 0.53 |
| BKN24231 | CG6168  | FBgn0036154 | -                                                    | QPCT, QPCTL                             | 0.53 |
| BKN22761 | CG4157  | FBgn0028693 | Regulatory particle non-ATPase 12                    | PSMD8                                   | 0.53 |
| BKN30821 | CG15034 | FBgn0029946 | -                                                    | -                                       | 0.53 |
| BKN46692 | CG13862 | FBgn0038942 | -                                                    | -                                       | 0.53 |
| BKN46094 | CG8025  | FBgn0038460 | Mtr3                                                 | EXOSC4, EXOSC6                          | 0.53 |
| BKN22485 | CG12373 | FBgn0026741 | mitochondrial ribosomal protein L18                  | MRPL18                                  | 0.53 |
| BKN22766 | CG5800  | FBgn0030855 | -                                                    | DDX18, DDX10, KCTD19                    | 0.53 |
| BKN20476 | CG14788 | FBgn0028274 | Nucleostemin 3                                       | GNL1, LSG1                              | 0.53 |
| BKN29607 | CG6631  | FBgn0039206 | anastral spindle 1                                   | -                                       | 0.53 |
| BKN28296 | CG6896  | FBgn0036801 | MYPT-75D                                             | PPP1R12B, NFKBIE, PPP1R12C, PPP1R       | 0.53 |
| BKN45761 | CG18622 | FBgn0036916 | -                                                    | -                                       | 0.53 |
| BKN27305 | CG6050  | FBgn0024556 | mitochondrial translation elongation factor Tu 1     | TUFM                                    | 0.53 |
| BKN20600 | CG9191  | FBgn0004378 | Kinesin-like protein at 61F                          | KIF11, KIF3A                            | 0.54 |
| BKN31100 | CG31330 | FBgn0086901 | crossveinless c                                      | ARHGAP18, ARHGAP11A, STARD13, AR        | 0.54 |
| BKN45103 | CG14749 | FBgn0033316 | -                                                    | GLE1                                    | 0.54 |
| BKN45613 | CG6175  | FBgn0036152 | -                                                    | -                                       | 0.54 |
| BKN45523 | CG42276 | FBgn0259171 | Phosphodiesterase 9                                  | PDE4D, PDE10A, PDE2A, PDE8B, PDE4C      | 0.54 |
| BKN21536 | CG4063  | FBgn0023444 | ebi                                                  | TBL1Y, WDR38, TBL1X, TBL1XR1            | 0.54 |
| BKN21248 | CG5179  | FBgn0019949 | Cyclin-dependent kinase 9                            | CDK13, CDK12, CDK9                      | 0.54 |
| BKN27526 | CG9968  | FBgn0030749 | Annexin B11                                          | ANXA2, ANXA4, ANXA13, ANXA6, ANXA7      | 0.54 |
| BKN21895 | CG12343 | FBgn0033556 | -                                                    | SYF2                                    | 0.54 |
| BKN22574 | CG12245 | FBgn0014179 | glial cells missing                                  | GCM2, GCM1                              | 0.54 |
| BKN23852 | CG12885 | FBgn0039523 | -                                                    | -                                       | 0.54 |
| BKN20845 | CG5170  | FBgn0027835 | Dodeca-satellite-binding protein 1                   | HDLBP, BICC1                            | 0.54 |
| BKN20745 | CG7274  | FBgn0085451 | hat-trick                                            | RBM34, ARID2, ARID5B, ARID3A, ARID3I    | 0.54 |
| BKN20490 | CG11337 | FBgn0039846 | Polynucleotide phosphorylase                         | PNPT1                                   | 0.54 |
| BKN46638 | CG2674  | FBgn0005278 | S-adenosylmethionine Synthetase                      | MAT2A, MAT1A                            | 0.54 |
| BKN29446 | CG15862 | FBgn0022382 | Protein kinase, cAMP-dependent, regulatory subunit 1 | PRKAR2B, CNBD2, PRKAR1B, PRKAR2A        | 0.54 |
| BKN21411 | CG15319 | FBgn0015624 | nejire                                               | CREBBP, EP300                           | 0.54 |

|          |          |             |                                                    |                                      |      |
|----------|----------|-------------|----------------------------------------------------|--------------------------------------|------|
| BKN25453 | CG2989   | FBgn0030171 | Chitinase 6                                        | SRL, OVGP1, CHIT1, CTBS, CHI3L1, CHI | 0.54 |
| BKN32559 | CG33323  | FBgn0037475 | 48 related 1                                       | NHLH1, LYL1, FIGLA, SCX, ASCL5, MSC, | 0.54 |
| BKN23069 | CG14085  | FBgn0036859 | -                                                  | KIAA0825                             | 0.54 |
| BKN40736 | CR32481  | FBgn0052481 | transfer RNA:Isoleucine-TAT 1-2                    | -                                    | 0.54 |
| BKN20329 | CG8542   | FBgn0001220 | Heat shock protein cognate 5                       | HSPA9                                | 0.54 |
| BKN46664 | CG34422  | FBgn0085451 | hat-trick                                          | RBM34, ARID2, ARID5B, ARID3A, ARID3I | 0.55 |
| BKN29139 | CG3034   | FBgn0040339 | Mediator complex subunit 22                        | MED22                                | 0.55 |
| BKN27496 | CG7943   | FBgn0039741 | -                                                  | SLC25A52, SLC25A53, SLC25A51         | 0.55 |
| BKN32372 | CG13937  | FBgn0035287 | -                                                  | CHST12, CHST8, CHST11, CHST13, CHE   | 0.55 |
| BKN20388 | CG1341   | FBgn0028687 | Regulatory particle triple-A ATPase 1              | WDR12, PSMC2, PSMC5, PSMC6           | 0.55 |
| BKN27734 | CG5281   | FBgn0037902 | -                                                  | SLC35G4, SLC35G1, SLC35G3, SLC35G1   | 0.55 |
| BKN40482 | CG18743  | FBgn0013276 | Heat-shock-protein-70Ab                            | HSPA1B, NCKAP1L, HSPA8, HSPA12A, H   | 0.55 |
| BKN40104 | CG13330  | FBgn0033848 | -                                                  | -                                    | 0.55 |
| BKN20542 | CG9752   | FBgn0034614 | -                                                  | C9orf64                              | 0.55 |
| BKN32123 | CG11768  | FBgn0037625 | -                                                  | ACTC1                                | 0.55 |
| BKN27493 | CG7614   | FBgn0024956 | Menage a trois 1                                   | MNAT1                                | 0.55 |
| BKN28845 | CG1057   | FBgn0037262 | Mediator complex subunit 31                        | MED31                                | 0.55 |
| BKN46250 | CG7137   | FBgn0034422 | -                                                  | RRP8                                 | 0.55 |
| BKN33034 | CG6449   | FBgn0036101 | Ninjurin A                                         | NINJ2, NINJ1                         | 0.55 |
| BKN34301 | HDC06747 | -           | -                                                  | -                                    | 0.55 |
| BKN33914 | HDC02355 | -           | -                                                  | -                                    | 0.55 |
| BKN25748 | CG10704  | FBgn0036285 | twin of eyg                                        | GBX1, PAX1, DUX4, PAX4, DUXA, PAX2,  | 0.56 |
| BKN20700 | CG15160  | FBgn0032688 | -                                                  | RPRD1B, RPRD2, RPRD1A                | 0.56 |
| BKN22484 | CG5371   | FBgn0011703 | Ribonucleoside diphosphate reductase large subunit | RRM1                                 | 0.56 |
| BKN20516 | CG7940   | FBgn0038576 | Actin-related protein 5                            | ACTR5                                | 0.56 |
| BKN20392 | CG17800  | FBgn0033159 | Down syndrome cell adhesion molecule 1             | PTPRU, MYLK4, PTPRM, DSCAML1, IL12   | 0.56 |
| BKN27429 | CG5041   | FBgn0031309 | Transcription factor B4                            | GTF2H3                               | 0.56 |
| BKN21141 | CG32082  | FBgn0052082 | Insulin receptor substrate 53 kDa                  | ALG10, PACSIN3, ALG10B, BAIAP2L2, B  | 0.56 |
| BKN29599 | CG9476   | FBgn0003886 | alpha-Tubulin at 85E                               | TUBA1B, TUBA3E, TUBA1A, TUBAL3, TU   | 0.56 |
| BKN41322 | CG33826  | FBgn0053826 | His2A:CG33826                                      | HIST1H2AB, H2AFB2, H2AFB3, HIST2H2   | 0.56 |
| BKN21616 | CG4200   | FBgn0003416 | small wing                                         | PLCG1, PLCD3, PLCL2, PLCD1, PLCD4, I | 0.56 |
| BKN22862 | CG12113  | FBgn0026679 | Integrator 4                                       | INTS4                                | 0.56 |
| BKN30922 | CG31466  | FBgn0051466 | -                                                  | -                                    | 0.56 |
| BKN45655 | CG8484   | FBgn0037751 | matotopetli                                        | ZNF543, ZBTB24, ZNF331, ZNF785       | 0.56 |
| BKN30941 | CG9775   | FBgn0037261 | -                                                  | CHTOP                                | 0.56 |
| BKN21555 | CG10484  | FBgn0000486 | Regulatory particle non-ATPase 3                   | PSMD3                                | 0.56 |
| BKN23374 | CG7903   | FBgn0039730 | -                                                  | RBM4, ADK, RBM14                     | 0.56 |
| BKN22677 | CG4013   | FBgn0024308 | Smrter                                             | PRRC2C, NCOR2, NCOR1                 | 0.56 |
| BKN31382 | CG12172  | FBgn0024294 | Serp1n 43Aa                                        | SERPINA10, SERPINE3, SERPINA5, SEF   | 0.56 |
| BKN32750 | CG31109  | FBgn0051109 | -                                                  | -                                    | 0.56 |
| BKN42213 | CG34232  | FBgn0085261 | -                                                  | -                                    | 0.56 |
| BKN24585 | CG4701   | FBgn0028868 | -                                                  | ATAD1                                | 0.56 |
| BKN26233 | CG5430   | FBgn0011294 | antennal protein 5                                 | MRPL38, PEBP4, PEBP1                 | 0.56 |
| BKN27646 | CG7977   | FBgn0026372 | Ribosomal protein L23A                             | RPL23A                               | 0.56 |
| BKN28335 | CG5545   | FBgn0032651 | Olig family                                        | OLIG3, OLIG1, OLIG2, BHLHE23, BHLHE  | 0.56 |
| BKN25762 | CG14625  | FBgn0040358 | -                                                  | -                                    | 0.56 |
| BKN21376 | CG5454   | FBgn0038667 | small ribonucleoprotein particle U1 subunit C      | SNRPC, ZMAT5                         | 0.57 |
| BKN45675 | CG43745  | FBgn0035330 | Myosuppressin receptor 2                           | GPR139, GPR142                       | 0.57 |
| BKN45701 | CG3820   | FBgn0010660 | Nucleoporin 214kD                                  | NUP214                               | 0.57 |
| BKN24658 | CG17083  | FBgn0039070 | -                                                  | CCDC114, CCDC63                      | 0.57 |
| BKN20647 | CG4561   | FBgn0027080 | Tyrosyl-tRNA synthetase                            | YARS, AIMP1                          | 0.57 |
| BKN41561 | CG33857  | FBgn0053857 | His3:CG33857                                       | HIST1H3E, HIST2H3C, H3F3C, H3F3A, H  | 0.57 |
| BKN46374 | CG42783  | FBgn0260478 | atypical protein kinase C                          | PRKCZ, PRKCI                         | 0.57 |
| BKN29679 | CG5175   | FBgn0038476 | kugelkern                                          | -                                    | 0.57 |
| BKN42300 | CR34530  | FBgn0082993 | snoRNA:Psi28S-1936                                 | -                                    | 0.57 |
| BKN25849 | CG3986   | FBgn0022700 | Chitinase 4                                        | CHIT1, CHI3L2, SRL, CHI3L1, OVGP1, C | 0.57 |
| BKN46507 | CG13837  | FBgn0039042 | -                                                  | -                                    | 0.57 |
| BKN33336 | CG11668  | FBgn0038113 | -                                                  | F10, MASP1, PROC, F7                 | 0.57 |
| BKN29134 | CG14903  | FBgn0038446 | -                                                  | PTRHD1                               | 0.57 |
| BKN30796 | CG13936  | FBgn0035282 | CNMamide                                           | -                                    | 0.57 |
| BKN21818 | CG4184   | FBgn0027592 | Mediator complex subunit 15                        | MED15                                | 0.57 |
| BKN29989 | CG10591  | FBgn0035621 | -                                                  | -                                    | 0.57 |

|          |         |             |                                                           |                                         |      |
|----------|---------|-------------|-----------------------------------------------------------|-----------------------------------------|------|
| BKN21805 | CG7393  | FBgn0024846 | p38b MAP kinase                                           | MAPK7, MAPK12, MAPK1, MAPK14, MAF       | 0.57 |
| BKN29457 | CG5226  | FBgn0034355 | -                                                         | SLC6A19, SLC6A4, SLC6A5, SLC6A14, S     | 0.57 |
| BKN20837 | CG8583  | FBgn0035771 | Secretory 63                                              | SEC63                                   | 0.57 |
| BKN45135 | CG12323 | FBgn0029134 | Proteasome beta5 subunit                                  | PSMB8, PSMB11, PSMB5                    | 0.57 |
| BKN22072 | CG4097  | FBgn0002284 | Proteasome beta6 subunit                                  | PSMB1                                   | 0.57 |
| BKN40607 | CG34315 | FBgn0085344 | -                                                         | -                                       | 0.57 |
| BKN24387 | CG11798 | FBgn0015371 | charlatan                                                 | -                                       | 0.57 |
| BKN21254 | CG7764  | FBgn0036513 | marionette                                                | GTF2H4                                  | 0.57 |
| BKN30129 | CG3569  | FBgn0034865 | Odorant receptor 59b                                      | -                                       | 0.57 |
| BKN32308 | CG10320 | FBgn0034645 | NADH dehydrogenase (ubiquinone) B12 subunit               | NDUFB3                                  | 0.57 |
| BKN46087 | CG9468  | FBgn0032069 | Lysosomal alpha-mannosidase VI                            | MAN2B1, MAN2A1, MAN2B2, MAN2A2          | 0.57 |
| BKN20168 | CG4202  | FBgn0029755 | Something about silencing 10                              | UTP3                                    | 0.58 |
| BKN46032 | CG42309 | FBgn0259209 | Muscle LIM protein at 60A                                 | CSRP2, CSRP1, CSRP3, CRIP1              | 0.58 |
| BKN27691 | CG5121  | FBgn0039337 | Mediator complex subunit 28                               | MED28, ALKBH6                           | 0.58 |
| BKN41108 | CG40042 | FBgn0058042 | Translocase of inner mitochondrial membrane 23            | TIMM23B, TIMM23                         | 0.58 |
| BKN29556 | CG33464 | FBgn0053464 | slit                                                      | SLIT2, VASN, ECM2, LRRC3C, LRRC3B,      | 0.58 |
| BKN22791 | CG14220 | FBgn0031036 | -                                                         | BRMS1, BRMS1L, SUDS3                    | 0.58 |
| BKN45430 | CG31155 | FBgn0051155 | Rpb7                                                      | POLR2G                                  | 0.58 |
| BKN29185 | CG5986  | FBgn0043455 | -                                                         | SDE2                                    | 0.58 |
| BKN31636 | CG17637 | FBgn0037004 | -                                                         | SLC46A1, SLC46A2, MFSD14B, SLC46A3      | 0.58 |
| BKN20813 | CG10361 | FBgn0036208 | -                                                         | GCAT, ALAS1, NCLN, ALAS2                | 0.58 |
| BKN46408 | CG42273 | FBgn0039345 | minibrain                                                 | DYRK4, DYRK3, DYRK2, DYRK1A, HIPK1      | 0.58 |
| BKN21063 | CG7886  | FBgn0038248 | -                                                         | NOD2, LRRC71, LRRC74A, CEP78, NOD       | 0.58 |
| BKN29963 | CG11370 | FBgn0037181 | -                                                         | -                                       | 0.58 |
| BKN27091 | CG8374  | FBgn0016792 | dalmatian                                                 | -                                       | 0.58 |
| BKN21944 | CG7382  | FBgn0031708 | -                                                         | TIMM21                                  | 0.58 |
| BKN32279 | CG15211 | FBgn0030234 | -                                                         | CKLF, CKLF-CMTM1, CMTM3, MAL, CMT       | 0.58 |
| BKN20786 | CG3423  | FBgn0020616 | Stromalin                                                 | STAG3, STAG1, STAG2                     | 0.58 |
| BKN32000 | CG14952 | FBgn0035377 | -                                                         | -                                       | 0.58 |
| BKN20178 | CG15899 | FBgn0029846 | Ca <sup>2+</sup> -channel protein alpha[[1]] subunit T    | CACNA1G, CATSPER1, CACNA1I, CACN        | 0.58 |
| BKN21117 | CG5222  | FBgn0036570 | Integrator 9                                              | INTS9                                   | 0.58 |
| BKN45829 | CG5476  | FBgn0039441 | TweedleN                                                  | -                                       | 0.58 |
| BKN26096 | CG3528  | FBgn0031430 | -                                                         | C4orf22                                 | 0.58 |
| BKN26496 | CG31562 | FBgn0051562 | -                                                         | -                                       | 0.58 |
| BKN28256 | CG17331 | FBgn0032596 | Proteasome beta4 subunit                                  | PSMB2                                   | 0.58 |
| BKN20746 | CG8545  | FBgn0033741 | -                                                         | NOP2, NSUN6                             | 0.58 |
| BKN24944 | CG7065  | FBgn0030091 | -                                                         | SMARCA4, SMARCA2                        | 0.59 |
| BKN21843 | CG4252  | FBgn0004367 | meiotic 41                                                | ATR                                     | 0.59 |
| BKN20213 | CG10809 | FBgn0036052 | -                                                         | ANKRD46, ANKRD61, ANKRD54               | 0.59 |
| BKN41308 | CG33820 | FBgn0053820 | His2A:CG33820                                             | HIST3H2A, H2AFJ, HIST2H2AC, HIST1H2     | 0.59 |
| BKN31089 | CG8192  | FBgn0034030 | -                                                         | -                                       | 0.59 |
| BKN20527 | CG8190  | FBgn0034029 | eukaryotic translation initiation factor 2B subunit gamma | EIF2B3                                  | 0.59 |
| BKN45433 | CG9386  | FBgn0037708 | -                                                         | TRMT44                                  | 0.59 |
| BKN32651 | CG14490 | FBgn0034281 | -                                                         | MORN3, RSPH10B, MORN4, ALS2CL, JP       | 0.59 |
| BKN21205 | CG1640  | FBgn0030478 | -                                                         | GPT2, GPT                               | 0.59 |
| BKN26525 | CG33129 | FBgn0053129 | -                                                         | TMEM214                                 | 0.59 |
| BKN20077 | CG4800  | FBgn0037874 | Translationally controlled tumor protein                  | FLJ44635, TPT1                          | 0.59 |
| BKN41321 | CG33823 | FBgn0053823 | His2A:CG33823                                             | HIST1H2AB, H2AFJ, HIST1H2AG, HIST1H     | 0.59 |
| BKN22874 | CG30077 | FBgn0050077 | Biogenesis of lysosome-related organelles complex 1       | BLOC1S1                                 | 0.59 |
| BKN32652 | CG32536 | FBgn0052536 | -                                                         | EBAG9                                   | 0.59 |
| BKN29194 | CG1417  | FBgn0003423 | sluggish A                                                | PRODH2, LOC102724788, PRODH             | 0.59 |
| BKN25295 | CG15654 | FBgn0085425 | -                                                         | KCNK4, KCNK18, KCNK1, KCNK17, KCNI      | 0.59 |
| BKN41319 | CG42342 | FBgn0000320 | -                                                         | COL5A1, COL17A1, COL6A3, COL14A1, C     | 0.59 |
| BKN21440 | CG5188  | FBgn0032247 | -                                                         | METAP1, METAP1D                         | 0.59 |
| BKN41497 | CG12546 | FBgn0037178 | -                                                         | -                                       | 0.59 |
| BKN45099 | CG10573 | FBgn0020294 | knockout                                                  | STOX1, STOX2                            | 0.59 |
| BKN22886 | CG9998  | FBgn0005411 | U2 small nuclear riboprotein auxiliary factor 50          | U2AF2, UHMK1                            | 0.59 |
| BKN21608 | CG15087 | FBgn0034380 | Vacuolar protein sorting 51                               | VPS51                                   | 0.59 |
| BKN26746 | CG7293  | FBgn0004381 | Kinesin-like protein at 68D                               | KIF3C, KIF5A, KIF5B, KIF3B, KIF5C, KIFC | 0.59 |
| BKN32250 | CG4022  | FBgn0035986 | -                                                         | PIH1D2                                  | 0.59 |
| BKN41734 | CG34320 | FBgn0085349 | -                                                         | -                                       | 0.59 |
| BKN45279 | CG30419 | FBgn0050419 | -                                                         | -                                       | 0.59 |

|          |          |             |                                                      |                                        |      |
|----------|----------|-------------|------------------------------------------------------|----------------------------------------|------|
| BKN40615 | CR31512  | FBgn0011999 | transfer RNA:Valine-CAC 2-1                          | -                                      | 0.60 |
| BKN25674 | CG32091  | FBgn0052091 | -                                                    | ABCG1, ABCG4, ABCG5                    | 0.60 |
| BKN29964 | CG5717   | FBgn0041709 | yellow-g                                             | DPM3                                   | 0.60 |
| BKN28865 | CG16890  | FBgn0028932 | -                                                    | FRA10AC1                               | 0.60 |
| BKN27669 | CG17754  | FBgn0030114 | -                                                    | KLHL3, KLHL12, KLHL4, KBTBD11, KLHC    | 0.60 |
| BKN40699 | CG9987   | FBgn0032781 | RtcB-like                                            | RTCB                                   | 0.60 |
| BKN22938 | CG17337  | FBgn0259979 | -                                                    | CNDP1, CNDP2                           | 0.60 |
| BKN41442 | CG32037  | FBgn0052037 | -                                                    | -                                      | 0.60 |
| BKN23561 | CG31630  | FBgn0051630 | milton                                               | HAP1, TRAK1, TRAK2                     | 0.60 |
| BKN41107 | CG11051  | FBgn0040813 | Neuropeptide-like precursor 2                        | -                                      | 0.60 |
| BKN41930 | CG32069  | FBgn0052069 | -                                                    | IER3IP1, HDHD2, LHPP                   | 0.60 |
| BKN27987 | CG4904   | FBgn0250843 | Proteasome alpha6 subunit                            | PSMA1                                  | 0.60 |
| BKN25456 | CG33456  | FBgn0085444 | muscle wasted                                        | GON4L, YY1AP1                          | 0.60 |
| BKN22605 | CG3284   | FBgn0004855 | RNA polymerase II 15kD subunit                       | POLR2I                                 | 0.60 |
| BKN21781 | CG10223  | FBgn0003732 | Topoisomerase 2                                      | TOP2B, TOP2A                           | 0.60 |
| BKN41159 | CG34230  | FBgn0085259 | -                                                    | -                                      | 0.60 |
| BKN31383 | CG5650   | FBgn0004103 | Protein phosphatase 1 at 87B                         | PPP1CC, PPP1CA, PPP1CB                 | 0.60 |
| BKN42643 | CG12405  | FBgn0033520 | Peroxiredoxin 2540-1                                 | PRDX3, PRDX4, PRDX6, PRDX1, PRDX2      | 0.60 |
| BKN21118 | CG9633   | FBgn0010173 | Replication Protein A 70                             | RPA1                                   | 0.60 |
| BKN31925 | CG32693  | FBgn0052693 | Gustatory receptor 9a                                | -                                      | 0.60 |
| BKN30049 | CG15738  | FBgn0030352 | severe impairment of CI with lengthened youth        | NDUFAF6                                | 0.60 |
| BKN41085 | CG44328  | FBgn0052635 | Neuropilin and tolloid-like                          | NETO1, NETO2                           | 0.60 |
| BKN23328 | CG13455  | FBgn0036498 | -                                                    | -                                      | 0.60 |
| BKN27655 | CG10978  | FBgn0037374 | jagunal                                              | JAGN1                                  | 0.60 |
| BKN40674 | CG6806   | FBgn0002565 | Larval serum protein 2                               | -                                      | 0.60 |
| BKN40550 | CG40858  | FBgn0085527 | -                                                    | -                                      | 0.61 |
| BKN26034 | CG14907  | FBgn0038455 | -                                                    | -                                      | 0.61 |
| BKN28882 | CG7808   | FBgn0039713 | Ribosomal protein S8                                 | RPS8                                   | 0.61 |
| BKN26486 | CG7669   | FBgn0038607 | hemingway                                            | CFAP97                                 | 0.61 |
| BKN23689 | CG17264  | FBgn0031490 | -                                                    | -                                      | 0.61 |
| BKN28504 | CG3668   | FBgn0004896 | forkhead domain 59A                                  | FOXC2, FOXB1, FOXS1, FOXB2, FOXA1,     | 0.61 |
| BKN31813 | CG3474   | FBgn0028871 | Cuticular protein 35B                                | -                                      | 0.61 |
| BKN23975 | CG12327  | FBgn0036492 | Bestrophin 3                                         | BEST4, BEST1, BEST3, BEST2             | 0.61 |
| BKN27133 | CG14630  | FBgn0014903 | -                                                    | TMLHE, BBOX1                           | 0.61 |
| BKN24094 | CG14416  | FBgn0040352 | -                                                    | -                                      | 0.61 |
| BKN33712 | HDC12227 | -           | -                                                    | -                                      | 0.61 |
| BKN24498 | CG8644   | FBgn0038133 | Osiris 22                                            | -                                      | 0.61 |
| BKN26869 | CG5669   | FBgn0039169 | Sp1-like factor for pairing sensitive-silencing      | SP9, SP4, SP2, SP5, SP8, KLF10, SP3, S | 0.61 |
| BKN41306 | CG33814  | FBgn0053814 | His2A:CG33814                                        | HIST1H2AE, HIST2H2AB, HIST1H2AK, HI    | 0.61 |
| BKN30911 | CG14177  | FBgn0036013 | Transmembrane channel-like                           | TMC8, TMC2, TMC4, TMC1, TMC7, TMC      | 0.61 |
| BKN27784 | CG6708   | FBgn0020626 | Oxysterol binding protein                            | OSBPL3, OSBPL7, OSBP, OSBP2, OSBP      | 0.61 |
| BKN30844 | CG15204  | FBgn0259241 | -                                                    | SBSPON                                 | 0.61 |
| BKN22457 | CG16728  | FBgn0033539 | G protein-coupled receptor kinase interacting ArfGAP | GIT1, AGAP2, GIT2                      | 0.61 |
| BKN25186 | CG33519  | FBgn0053519 | Unc-89                                               | PLEKHG4B, PSKH1, HMCN2, TTN, CAMK      | 0.61 |
| BKN20484 | CG10198  | FBgn0039120 | Nucleoporin 98-96kD                                  | NUP58, NUP98, NCOA5, NUP62             | 0.61 |
| BKN24588 | CG4323   | FBgn0038797 | Dicarboxylate carrier 2                              | UCP2, SLC25A10, UCP1, UCP3, SLC25A     | 0.61 |
| BKN24987 | CG7384   | FBgn0032262 | -                                                    | -                                      | 0.61 |
| BKN25452 | CG4757   | FBgn0027584 | -                                                    | CES3, NLGN4Y, NLGN2, CEL, NLGN4X, (    | 0.61 |
| BKN27217 | CG31177  | FBgn0259237 | -                                                    | TRHDE, ERAP2, ANPEP, LNPEP, NPEPP      | 0.61 |
| BKN30350 | CG32150  | FBgn0052150 | -                                                    | RASSF7, RASSF8, RASSF9, RASSF10        | 0.61 |
| BKN42613 | CG16824  | FBgn0040973 | -                                                    | TMA7                                   | 0.61 |
| BKN27199 | CG8902   | FBgn0031886 | Nuf2                                                 | CCDC39                                 | 0.61 |
| BKN20389 | CG10697  | FBgn0000422 | Dopa decarboxylase                                   | HDC, DDC                               | 0.61 |
| BKN27246 | CG2714   | FBgn0000520 | cramped                                              | CRAMP1                                 | 0.61 |
| BKN23032 | CG9590   | FBgn0038360 | -                                                    | FAM114A2, FAM114A1                     | 0.61 |
| BKN26556 | CG5740   | FBgn0259736 | -                                                    | -                                      | 0.61 |
| BKN21463 | CG2469   | FBgn0035205 | Ctr9                                                 | CTR9                                   | 0.62 |
| BKN42185 | CG34322  | FBgn0085351 | inaF-A                                               | -                                      | 0.62 |
| BKN41205 | CG6824   | FBgn0003028 | ovo                                                  | OVOL3, ZNF770, OVOL2, ZNF131, REST,    | 0.62 |
| BKN41423 | CG40189  | FBgn0058189 | -                                                    | -                                      | 0.62 |
| BKN28477 | CG4665   | FBgn0035964 | Dihydropteridine reductase                           | QDPR                                   | 0.62 |
| BKN21625 | CG14299  | FBgn0038651 | ectopic P-granules autophagy protein 5               | EPG5                                   | 0.62 |



|          |          |             |                                                    |                                         |      |
|----------|----------|-------------|----------------------------------------------------|-----------------------------------------|------|
| BKN25718 | CG8179   | FBgn0034020 | -                                                  | STAC2, STAC3, STAC                      | 0.62 |
| BKN26829 | CG14273  | FBgn0032024 | -                                                  | -                                       | 0.62 |
| BKN32404 | CG33936  | FBgn0053936 | -                                                  | ZFAND6, ZFAND5                          | 0.62 |
| BKN30160 | CG8348   | FBgn0012344 | Diuretic hormone 44                                | -                                       | 0.62 |
| BKN30900 | CG9819   | FBgn0030758 | Calcineurin A at 14F                               | PPP3CA, PPP3CB, PPP3CC                  | 0.62 |
| BKN45051 | CG8503   | FBgn0033917 | SET and MYND domain containing, arthropod-specific | SMYD4, SMYD2, ZMYND15, SMYD1, SMYD3     | 0.62 |
| BKN27418 | CG10947  | FBgn0032857 | -                                                  | CAMKMT                                  | 0.62 |
| BKN21446 | CG15523  | FBgn0039727 | Vacuolar protein sorting 13B                       | VPS13B, VPS13A, VPS13D, VPS13C          | 0.62 |
| BKN46196 | CG9131   | FBgn0029161 | slowmo                                             | PRELID3A, PRELID3B, PRELID2             | 0.62 |
| BKN31215 | CG8929   | FBgn0034504 | -                                                  | C11orf57, SRRM4                         | 0.62 |
| BKN26102 | CG9487   | FBgn0085427 | -                                                  | -                                       | 0.62 |
| BKN25494 | CG9512   | FBgn0030593 | -                                                  | CHDH                                    | 0.62 |
| BKN25727 | CG33202  | FBgn0053202 | defective proboscis extension response 11          | KIRREL, KIRREL3, IGSF9B, KIRREL2, US    | 0.62 |
| BKN46371 | CG10270  | FBgn0022699 | D19B                                               | ZNF341, ZNF668, ZNF30, ZNF852, ZNF28    | 0.62 |
| BKN45552 | CG8749   | FBgn0016978 | small ribonucleoprotein particle U1 subunit 70K    | RBM24, SNRNP35, SNRNP70                 | 0.62 |
| BKN24587 | CG17186  | FBgn0038741 | -                                                  | -                                       | 0.62 |
| BKN33798 | HDC18361 | -           | -                                                  | -                                       | 0.62 |
| BKN22389 | CG4893   | FBgn0036616 | ringmaker                                          | TPPP, TPPP3, TPPP2                      | 0.62 |
| BKN31788 | CG30267  | FBgn0050267 | -                                                  | -                                       | 0.62 |
| BKN22082 | CG31671  | FBgn0031390 | tho2                                               | THOC2, ZC3H13                           | 0.62 |
| BKN33975 | HDC12388 | FBgn0260723 | -                                                  | -                                       | 0.62 |
| BKN25694 | CG33455  | FBgn0085444 | muscle wasted                                      | GON4L, YY1AP1                           | 0.62 |
| BKN29054 | CG11290  | FBgn0034975 | enoki mushroom                                     | KAT7, KAT5, KAT8, KAT6B, KAT6A          | 0.62 |
| BKN46483 | CG12907  | FBgn0250840 | -                                                  | -                                       | 0.63 |
| BKN25668 | CG13443  | FBgn0034548 | -                                                  | -                                       | 0.63 |
| BKN25003 | CG4936   | FBgn0038768 | -                                                  | ZNF730, ZNF792, ZNF732, ZSCAN2, ZNF     | 0.63 |
| BKN21627 | CG7671   | FBgn0038609 | Nucleoporin 43kD                                   | NUP43                                   | 0.63 |
| BKN25863 | CG11092  | FBgn0027537 | Nucleoporin 93kD-1                                 | NUP93                                   | 0.63 |
| BKN41490 | CG34448  | FBgn0085477 | -                                                  | LIPI, PNLIPRP2, LIPH, PNLIPRP3, PLA1A   | 0.63 |
| BKN23972 | CG9498   | FBgn0031801 | -                                                  | -                                       | 0.63 |
| BKN41257 | CG33876  | FBgn0053876 | His2B:CG33876                                      | HIST3H2BB, HIST2H2BF, H2BFM, H2BFV      | 0.63 |
| BKN20648 | CG9143   | FBgn0034496 | -                                                  | DDX24                                   | 0.63 |
| BKN24209 | CG10142  | FBgn0035076 | Ance-5                                             | TMEM27, ACE2, ACE                       | 0.63 |
| BKN22288 | CG8787   | FBgn0000142 | Additional sex combs                               | ASXL1, ASXL3, ASXL2                     | 0.63 |
| BKN27426 | CG12085  | FBgn0028577 | half pint                                          | PUF60                                   | 0.63 |
| BKN22200 | CG14716  | FBgn0037933 | Heme oxygenase                                     | HMOX2, HMOX1                            | 0.63 |
| BKN24592 | CG6061   | FBgn0033846 | Myb-interacting protein 120                        | LIN54, TESMIN                           | 0.63 |
| BKN29977 | CG4491   | FBgn0005771 | no ocelli                                          | ZNF503, ZNF703                          | 0.63 |
| BKN27538 | CG18009  | FBgn0026758 | TATA box binding protein-related factor 2          | TBPL1, TBPL2, TBP                       | 0.63 |
| BKN41325 | CG33835  | FBgn0053835 | His2A:CG33835                                      | H2AFB3, H2AFJ, HIST1H2AB, H2AFY, HIST   | 0.63 |
| BKN21787 | CG5018   | FBgn0036578 | lethal (3) 72Dn                                    | UTP4                                    | 0.63 |
| BKN21514 | CG6015   | FBgn0038927 | -                                                  | CDC40                                   | 0.63 |
| BKN20776 | CG10691  | FBgn0002031 | lethal (2) 37Cc                                    | PHB, PHB2                               | 0.63 |
| BKN22828 | CG2128   | FBgn0025825 | Histone deacetylase 3                              | HDAC3, HDAC1, HDAC2, HDAC8              | 0.63 |
| BKN27279 | CG30339  | FBgn0050339 | -                                                  | CLVS1, SEC14L1, CLVS2, SEC14L5, SEC     | 0.63 |
| BKN28990 | CG7398   | FBgn0024921 | Transportin                                        | TNPO1, TNPO2                            | 0.63 |
| BKN30252 | CG3241   | FBgn0005616 | male-specific lethal 2                             | MSL2                                    | 0.63 |
| BKN28409 | CG2910   | FBgn0027548 | spenito                                            | SPEN, RBM15, RBM15B                     | 0.63 |
| BKN25836 | CG7257   | FBgn0036224 | Regulatory particle triple-A ATPase 4-related      | PSMC6, PSMC2, WDR12, PSMC5              | 0.63 |
| BKN31798 | CG14405  | FBgn0032888 | Chemosensory protein B 38c                         | -                                       | 0.63 |
| BKN20650 | CG16984  | FBgn0062517 | -                                                  | ENKUR                                   | 0.63 |
| BKN31014 | CG8867   | FBgn0020906 | Jonah 25Bi                                         | KLK3                                    | 0.63 |
| BKN27649 | CG4528   | FBgn0003449 | sans fille                                         | SNRPA, RNPC3, SNRPB2                    | 0.63 |
| BKN45569 | CG7756   | FBgn0001217 | Heat shock protein cognate 2                       | HSPA1A, HSPA6, HSPA1B, HSPA5, HSP       | 0.63 |
| BKN26871 | CG2985   | FBgn0004045 | Yolk protein 1                                     | LIPC, LPL, PLA1A, PNLIPRP1, LIPI, LIPH, | 0.64 |
| BKN32070 | CG3379   | FBgn0013981 | Histone H4 replacement                             | HIST1H4B, HIST1H4A, HIST4H4, HIST1H     | 0.64 |
| BKN21455 | CG12323  | FBgn0029134 | Proteasome beta5 subunit                           | PSMB8, PSMB11, PSMB5                    | 0.64 |
| BKN21968 | CG7840   | FBgn0032014 | -                                                  | SRD5A3                                  | 0.64 |
| BKN26282 | CG32628  | FBgn0052628 | Nna1 carboxypeptidase                              | AGBL3, AGLB5, AGLB2, AGTPBP1, AGLB      | 0.64 |
| BKN22618 | CG5602   | FBgn0034922 | DNA ligase I                                       | LIG1                                    | 0.64 |
| BKN27762 | CG3328   | FBgn0034985 | -                                                  | MYRFL, MYRF                             | 0.64 |
| BKN20532 | CG9900   | FBgn0004643 | Zeste-white 10                                     | ZW10                                    | 0.64 |

|          |          |             |                                             |                                          |      |
|----------|----------|-------------|---------------------------------------------|------------------------------------------|------|
| BKN32368 | CG31051  | FBgn0051051 | -                                           | -                                        | 0.64 |
| BKN27830 | CG14514  | FBgn0039654 | Bromodomain containing 8                    | BRD8                                     | 0.64 |
| BKN26108 | CG6265   | FBgn0039478 | Neprilysin 5                                | ECEL1, MMEL1, KEL, PHEX, ECE1, ECE2      | 0.64 |
| BKN33601 | HDC09484 | -           | -                                           | -                                        | 0.64 |
| BKN23274 | CG33509  | FBgn0053509 | -                                           | -                                        | 0.64 |
| BKN32486 | CG15048  | FBgn0030935 | Beadex                                      | LMO3, LMO2, LMO1, LMO4                   | 0.64 |
| BKN24575 | CG11608  | FBgn0038069 | -                                           | LIPK, LIPJ, LIPF, LIPN, LIPM, LIPA       | 0.64 |
| BKN21026 | CG6443   | FBgn0032290 | -                                           | RTFDC1                                   | 0.64 |
| BKN34674 | HDC20621 | FBgn0058042 | -                                           | -                                        | 0.64 |
| BKN27845 | CG3918   | FBgn0029873 | -                                           | SREK1IP1, FAM133B                        | 0.64 |
| BKN23390 | CG8959   | FBgn0030691 | EF-hand domain containing 1.1               | EFHC1, EFHC2                             | 0.64 |
| BKN30037 | CG13964  | FBgn0032831 | sickie                                      | NAV1, NAV2, NAV3                         | 0.64 |
| BKN25780 | CG5436   | FBgn0001230 | Heat shock protein 68                       | HSPA8, HSPA5, HSPA12B, HSPA6, NCK1       | 0.64 |
| BKN21817 | CG7556   | FBgn0030990 | -                                           | DNAJC7, DNAJC1, DNAJC4, DNAJC18          | 0.64 |
| BKN29888 | CG13364  | FBgn0026879 | -                                           | TMA7                                     | 0.64 |
| BKN31402 | CG3183   | FBgn0033081 | geminin                                     | GMNC, MCIDAS, GMNN                       | 0.64 |
| BKN21478 | CG6938   | FBgn0036235 | -                                           | ANO9, ANO1, ANO4, ANO5, ANO2, ANO6       | 0.64 |
| BKN20768 | CG6323   | FBgn0039465 | Tetraspanin 97E                             | TSPAN13, TSPAN31                         | 0.64 |
| BKN22580 | CG30100  | FBgn0050100 | -                                           | MTRF1L, C12orf65, MTRF1                  | 0.64 |
| BKN46142 | CG12118  | FBgn0030101 | -                                           | MMADHC                                   | 0.64 |
| BKN31114 | CG1330   | FBgn0004779 | Ccp84Ae                                     | -                                        | 0.65 |
| BKN26941 | CG10862  | FBgn0035455 | -                                           | UBE2E1, UBE2N, UBE2D2, UBE2D4, UBE2E2    | 0.65 |
| BKN21879 | CG10370  | FBgn0028684 | Regulatory particle triple-A ATPase 5       | PSMC3                                    | 0.65 |
| BKN22805 | CG5363   | FBgn0004106 | Cyclin-dependent kinase 1                   | CDK5, CDK1, CDK18, CDK14, CDK3, CDK2     | 0.65 |
| BKN40571 | CG12608  | FBgn0030630 | -                                           | PAK1IP1, WDR55                           | 0.65 |
| BKN41539 | CG33812  | FBgn0053812 | His3:CG33812                                | H3F3A, HIST1H3B, H3F3B, CENPA, HIST1H3A  | 0.65 |
| BKN29520 | CG31695  | FBgn0005590 | screw                                       | GDF15, BMP6, TGFB2, TGFB3, INHBE, BMP7   | 0.65 |
| BKN22940 | CG13630  | FBgn0039219 | -                                           | METAP1D, METAP1                          | 0.65 |
| BKN31011 | CG10788  | FBgn0010295 | new glue 3                                  | -                                        | 0.65 |
| BKN23037 | CG3127   | FBgn0250906 | Phosphoglycerate kinase                     | PGK2, PGK1                               | 0.65 |
| BKN46080 | CG15119  | FBgn0034430 | Myb-interacting protein 40                  | SMIM4, LIN37, C12orf73                   | 0.65 |
| BKN22014 | CG16983  | FBgn0025637 | SKP1-related A                              | SKP1                                     | 0.65 |
| BKN21760 | CG12512  | FBgn0031703 | -                                           | ACSF3, ACSF2                             | 0.65 |
| BKN20447 | CG12084  | FBgn0043458 | -                                           | ZYG11A, ZYG11B, ZER1                     | 0.65 |
| BKN33210 | CG3327   | FBgn0020445 | Early gene at 23                            | ABCG8, ABCG5, ABCD4, ABCG4, ABCG1        | 0.65 |
| BKN32545 | CG13879  | FBgn0035120 | wee Augmin                                  | -                                        | 0.65 |
| BKN26249 | CG9948   | FBgn0035721 | -                                           | -                                        | 0.65 |
| BKN27326 | CG9131   | FBgn0029161 | slowmo                                      | PRELID3A, PRELID3B, PRELID2              | 0.65 |
| BKN33037 | CG5084   | FBgn0034288 | -                                           | -                                        | 0.65 |
| BKN29130 | CG4645   | FBgn0030435 | -                                           | YIPF1, YIPF2                             | 0.65 |
| BKN27301 | CG4938   | FBgn0021750 | Seryl-tRNA synthetase, mitochondrial        | SARS2, FBXO17, SARS                      | 0.65 |
| BKN20695 | CG11840  | FBgn0031260 | Signal peptide peptidase                    | SPPL2C, SPPL3, HM13                      | 0.65 |
| BKN41331 | CG33853  | FBgn0053853 | His2A:CG33853                               | H2AFX, HIST1H2AD, H2AFY, HIST1H2AJ       | 0.65 |
| BKN32342 | CG15113  | FBgn0004572 | 5-hydroxytryptamine (serotonin) receptor 1B | ADRA2A, HTR1E, HTR5A, HTR1D, HTR7, HTR2A | 0.65 |
| BKN28143 | CG9748   | FBgn0000171 | belle                                       | DDX3Y, DDX3X, DDX4                       | 0.65 |
| BKN21637 | CG4894   | FBgn0001991 | Ca[2+]-channel protein alpha[[1]] subunit D | SCN10A, CACNA1F, CACNA1S, CACNA1C        | 0.65 |
| BKN28430 | CG9412   | FBgn0015778 | rasputin                                    | G3BP2, G3BP1                             | 0.65 |
| BKN28091 | CG12104  | FBgn0035238 | -                                           | TOX3, UBTF, TOX, HMGB3, TOX4, TFAM       | 0.65 |
| BKN40028 | CG17139  | FBgn0260453 | -                                           | VDAC1, VDAC2, VDAC3                      | 0.66 |
| BKN41013 | CG34010  | FBgn0054010 | -                                           | GLYAT, GLYATL1, GLYATL3, GLYATL2         | 0.66 |
| BKN33326 | CG33752  | FBgn0053752 | -                                           | -                                        | 0.66 |
| BKN28365 | CG12000  | FBgn0250746 | Proteasome beta7 subunit                    | PSMB4                                    | 0.66 |
| BKN26737 | CG18212  | FBgn0038535 | aluminum tubes                              | RRBP1                                    | 0.66 |
| BKN21325 | CG3542   | FBgn0031492 | -                                           | PRPF40B, PRPF40A                         | 0.66 |
| BKN29903 | CG32813  | FBgn0052813 | -                                           | RAD54B                                   | 0.66 |
| BKN25182 | CG17382  | FBgn0039080 | Ionotropic receptor 94h                     | GRIK5, GRID2, GRID1, GRIK3, GRIK2        | 0.66 |
| BKN29148 | CG2852   | FBgn0034753 | -                                           | NKTR, PPIB, RGPD4, RGPD5, PPIAL4A, I     | 0.66 |
| BKN22345 | CG6769   | FBgn0030878 | -                                           | ZNF622                                   | 0.66 |
| BKN29089 | CG5266   | FBgn0086134 | Proteasome alpha2 subunit                   | PSMA2, PSMA5, PSMA7, PSMA8               | 0.66 |
| BKN27591 | CG11295  | FBgn0013548 | lethal-(2)-denticleless                     | DTL                                      | 0.66 |
| BKN29452 | CG4147   | FBgn0001218 | Heat shock 70-kDa protein cognate 3         | HSPA5, HSPA1L, HSPA14, HSPA8, HSPA9      | 0.66 |
| BKN21313 | CG1749   | FBgn0030305 | Ubiquitin activating enzyme 5               | UBA5                                     | 0.66 |

|          |         |             |                                                            |                                         |      |
|----------|---------|-------------|------------------------------------------------------------|-----------------------------------------|------|
| BKN20686 | CG7292  | FBgn0038269 | Rrp6                                                       | EXOSC10                                 | 0.66 |
| BKN41330 | CG33850 | FBgn0053850 | His2A:CG33850                                              | HIST1H2AH, HIST3H2A, HIST1H2AD, HIS     | 0.66 |
| BKN41125 | CG32825 | FBgn0062565 | Odorant receptor 19b                                       | -                                       | 0.66 |
| BKN26443 | CG18417 | FBgn0035780 | -                                                          | CPA1, CPA3, CPA4, CPA5, CPA6, CPB2,     | 0.66 |
| BKN25302 | CG10911 | FBgn0034295 | -                                                          | -                                       | 0.66 |
| BKN27597 | CG8979  | FBgn0033669 | Proteasome inhibitor 31 kDa                                | PSMF1                                   | 0.66 |
| BKN25047 | CG1647  | FBgn0039602 | -                                                          | OVOL2, ZNF770, RP1, ZNF655, DMP1, IB    | 0.66 |
| BKN45751 | CG31666 | FBgn0086758 | Chronologically inappropriate morphogenesis                | ZBTB12, ZBTB49, ZBTB9, ZBTB10, BACH     | 0.66 |
| BKN23431 | CG7532  | FBgn0028915 | lethal (2) 34Fc                                            | FRRS1                                   | 0.66 |
| BKN45159 | CG11221 | FBgn0031855 | -                                                          | SBK1, SBK2, SBK3                        | 0.66 |
| BKN26559 | CG8300  | FBgn0029937 | -                                                          | FAM177B, FAM177A1                       | 0.66 |
| BKN21730 | CG10726 | FBgn0014127 | barren                                                     | NCAPH                                   | 0.66 |
| BKN21481 | CG3329  | FBgn0023174 | Proteasome beta2 subunit                                   | PSMB10, PSMB7                           | 0.67 |
| BKN29219 | CG3455  | FBgn0028685 | Regulatory particle triple-A ATPase 4                      | WDR12, PSMC6, PSMC5, PSMC2              | 0.67 |
| BKN25523 | CG18471 | FBgn0024232 | gprs                                                       | ENC1, KLHL25                            | 0.67 |
| BKN21943 | CG9104  | FBgn0030800 | Nitrogen permease regulator-like 2                         | NPRL2, ZMYND10                          | 0.67 |
| BKN29413 | CG9878  | FBgn0027360 | Translocase of inner membrane 10                           | TIMM10                                  | 0.67 |
| BKN22741 | CG3180  | FBgn0003276 | RNA polymerase II 140kD subunit                            | POLR3B, POLR2B                          | 0.67 |
| BKN27806 | CG14791 | FBgn0025382 | Rab27                                                      | RAB27B, RAB27A                          | 0.67 |
| BKN30297 | CG14564 | FBgn0037131 | -                                                          | -                                       | 0.67 |
| BKN31650 | CG11278 | FBgn0036341 | Syntaxin 13                                                | STX17, TSNARE1, STX7, STX12             | 0.67 |
| BKN26740 | CG13656 | FBgn0039307 | -                                                          | -                                       | 0.67 |
| BKN20730 | CG1528  | FBgn0028968 | Coat Protein (coatomer) gamma                              | COPG2, COPG1                            | 0.67 |
| BKN45278 | CG14463 | FBgn0037535 | Phosphatidylinositol glycan anchor biosynthesis class PIGH | -                                       | 0.67 |
| BKN25958 | CG30073 | FBgn0050073 | Odorant-binding protein 50b                                | -                                       | 0.67 |
| BKN32626 | CG6689  | FBgn0037877 | -                                                          | ZNF296, ZNF691, ZNF560, KLF17, WT1, I   | 0.67 |
| BKN45442 | CG15151 | FBgn0243486 | reduced ocelli                                             | PPP1R42                                 | 0.67 |
| BKN29232 | CG17737 | FBgn0035423 | eukaryotic translation initiation factor 1                 | EIF1B, EIF1                             | 0.67 |
| BKN20315 | CG3820  | FBgn0010660 | Nucleoporin 214kD                                          | NUP214                                  | 0.67 |
| BKN41326 | CG33838 | FBgn0053838 | His2A:CG33838                                              | HIST2H2AB, H2AFB2, H2AFY, HIST1H2A      | 0.67 |
| BKN22248 | CG3587  | FBgn0023521 | -                                                          | KT112                                   | 0.67 |
| BKN21483 | CG4931  | FBgn0038320 | specifically Rac1-associated protein 1                     | CYFIP2, CYFIP1                          | 0.67 |
| BKN45209 | CG3068  | FBgn0000147 | aurora A                                                   | AURKC, AURKB, AURKA                     | 0.67 |
| BKN20264 | CG7115  | FBgn0027515 | -                                                          | ILKAP, PPM1L, PPM1K, PPM1E, PP2D1,      | 0.67 |
| BKN26474 | CG17525 | FBgn0063496 | Glutathione S transferase E4                               | GSTT2, EEF1G, GSTT1, GSTT2B, MARS,      | 0.67 |
| BKN45322 | CG12653 | FBgn0000233 | buttonhead                                                 | EGR1, ZNF526, SP7, SP8, EGR3, SP9, SI   | 0.67 |
| BKN26505 | CG15208 | FBgn0030247 | -                                                          | C21orf2                                 | 0.67 |
| BKN25475 | CG7574  | FBgn0026263 | bip1                                                       | -                                       | 0.67 |
| BKN42189 | CG2512  | FBgn0003885 | alpha-Tubulin at 84D                                       | TUBA4A, TUBA1B, TUBA3D, TUBA1C, TL      | 0.67 |
| BKN42655 | CR34643 | FBgn0082966 | snoRNA:Psi28S-3327b                                        | -                                       | 0.67 |
| BKN30929 | CG11401 | FBgn0037170 | thioredoxin reductase 2                                    | TXNRD1, TXNRD2, GSR, TXNRD3             | 0.67 |
| BKN31574 | CG11562 | FBgn0031247 | -                                                          | PET117                                  | 0.67 |
| BKN26890 | CG13309 | FBgn0035933 | -                                                          | -                                       | 0.67 |
| BKN21403 | CG4274  | FBgn0001086 | fizzy                                                      | CDC20B, FZR1, CDC20                     | 0.67 |
| BKN24936 | CG13826 | FBgn0040590 | cap-n-collar                                               | BACH1, NFE2L1, KLHL6, NFE2, NFE2L2,     | 0.68 |
| BKN25201 | CG4481  | FBgn0028431 | Glutamate receptor IB                                      | GRIK2, GRIK3, GRIA3, GRIA1, GRIK1, Gf   | 0.68 |
| BKN22895 | CG8580  | FBgn0082598 | akirin                                                     | AKIRIN1, AKIRIN2                        | 0.68 |
| BKN20602 | CG1810  | FBgn0030556 | mRNA-capping-enzyme                                        | RNGTT, DUSP11                           | 0.68 |
| BKN26856 | CG31513 | FBgn0051513 | -                                                          | -                                       | 0.68 |
| BKN21756 | CG18616 | FBgn0260444 | CCR4-NOT transcription complex subunit 10                  | CNOT10                                  | 0.68 |
| BKN28526 | CG3931  | FBgn0034879 | Rrp4                                                       | EXOSC2                                  | 0.68 |
| BKN25639 | CG1618  | FBgn0000346 | comatose                                                   | NSF                                     | 0.68 |
| BKN45200 | CG4088  | FBgn0005654 | Origin recognition complex subunit 3                       | ORC3                                    | 0.68 |
| BKN24935 | CG4319  | FBgn0011706 | reaper                                                     | TSC1, RIN1                              | 0.68 |
| BKN41583 | CG31449 | FBgn0013277 | Heat-shock-protein-70Ba                                    | NCKAP1, HSPA6, HSPA1B, HSPA5, NCK       | 0.68 |
| BKN41499 | CG33821 | FBgn0053821 | His3:CG33821                                               | HIST1H3J, HIST2H3C, HIST1H3F, HIST1I    | 0.68 |
| BKN26584 | CG16753 | FBgn0035393 | -                                                          | FAM207A                                 | 0.68 |
| BKN29819 | CG1115  | FBgn0037299 | Vacuolar protein sorting 37B                               | VPS37C, VPS37B, C9orf85, VPS37A, VPS    | 0.68 |
| BKN27317 | CG7581  | FBgn0025457 | Bub3                                                       | BUB3                                    | 0.68 |
| BKN23027 | CG2009  | FBgn0026262 | bip2                                                       | ING4, TAF8, ING2, ING3, ING1, ING5, TAI | 0.68 |
| BKN33369 | CG11362 | FBgn0034737 | -                                                          | -                                       | 0.68 |
| BKN31497 | CG3448  | FBgn0035996 | -                                                          | -                                       | 0.68 |

|          |          |             |                                                    |                                     |      |
|----------|----------|-------------|----------------------------------------------------|-------------------------------------|------|
| BKN42114 | CG10679  | FBgn0032725 | Nedd8                                              | RAD23B, UBA52, UBB, UBD, NEDD8, ISC | 0.68 |
| BKN20853 | CG1471   | FBgn0039774 | Ceramidase                                         | ASAH2, ASAH2B                       | 0.68 |
| BKN29269 | CG11525  | FBgn0039858 | Cyclin G                                           | CCNB2, CCNG1, CCNB3, CCNI2, CCNB1   | 0.68 |
| BKN33780 | HDC04339 | FBgn0250870 | -                                                  | -                                   | 0.69 |
| BKN45817 | CG6061   | FBgn0033846 | Myb-interacting protein 120                        | LIN54, TESMIN                       | 0.69 |
| BKN28188 | CG3630   | FBgn0023540 | -                                                  | ABRA, ABRACL                        | 0.69 |
| BKN29170 | CG1796   | FBgn0030365 | Transport and Golgi organization 4                 | PLRG1                               | 0.69 |
| BKN40722 | CG34042  | FBgn0065110 | pickpocket 10                                      | SCNN1G, ASIC3, ASIC1, ASIC4, SCNN1E | 0.69 |
| BKN42380 | CG42314  | FBgn0004865 | plasma membrane calcium ATPase                     | ATP2B1, ATP2B3, ATP2B2, ATP2B4      | 0.69 |
| BKN32589 | CG14521  | FBgn0039617 | Dpr-interacting protein gamma                      | JAM2, ESAM, NTM, VSIG1, GPA33, CXAI | 0.69 |
| BKN21370 | CG3416   | FBgn0002787 | Regulatory particle non-ATPase 8                   | PSMD7                               | 0.69 |
| BKN20820 | CG1972   | FBgn0039691 | Integrator 11                                      | CPSF3, CPSF3L                       | 0.69 |
| BKN21112 | CG8598   | FBgn0035766 | Establishment of cohesion                          | POLI, REV1, POLH, POLK, ESCO2, ESCC | 0.69 |
| BKN31810 | CG12115  | FBgn0030097 | -                                                  | -                                   | 0.69 |
| BKN20843 | CG8975   | FBgn0011704 | Ribonucleoside diphosphate reductase small subunit | RRM2, RRM2B                         | 0.69 |
| BKN20923 | CG1877   | FBgn0015509 | Cullin 1                                           | CUL1, CACUL1                        | 0.69 |
| BKN45758 | CG1772   | FBgn0010316 | dacapo                                             | CDKN1B, CDKN1A, CDKN1C              | 0.69 |
| BKN46099 | CG9032   | FBgn0014391 | stunted                                            | ATP5E                               | 0.69 |
| BKN20346 | CG6699   | FBgn0025724 | Coat Protein (coatomer) beta'                      | COPA, COPB2                         | 0.69 |
| BKN21769 | CG11103  | FBgn0030522 | -                                                  | TM2D2                               | 0.69 |
| BKN25372 | CG30052  | FBgn0050052 | Odorant-binding protein 49a                        | -                                   | 0.69 |
| BKN45039 | CG8560   | FBgn0035781 | -                                                  | CPA4, CPA3, CPA5, CPA2, CPB1, CPA1, | 0.69 |
| BKN33804 | HDC08545 | FBgn0054047 | -                                                  | -                                   | 0.69 |
| BKN29271 | CG8922   | FBgn0002590 | Ribosomal protein S5a                              | MRPS7, RPS5                         | 0.69 |
| BKN21518 | CG4332   | FBgn0030456 | -                                                  | CLPTM1, CLPTM1L                     | 0.69 |
| BKN21755 | CG11228  | FBgn0034453 | hippo                                              | STK4, STK3                          | 0.69 |
| BKN27999 | CG10671  | FBgn0035586 | Fat storage inducing transmembrane protein         | FITM1, FITM2                        | 0.69 |
| BKN41228 | CG33898  | FBgn0053898 | His2B:CG33898                                      | HIST2H2BF, HIST1H2BB, HIST1H2BC, HI | 0.69 |
| BKN24419 | CG4784   | FBgn0036619 | Cuticular protein 72Ec                             | -                                   | 0.69 |
| BKN24628 | CG15877  | FBgn0035337 | -                                                  | C7orf50                             | 0.70 |
| BKN24021 | CG4877   | FBgn0036624 | RING-associated factor 2                           | ZMYND10                             | 0.70 |
| BKN24254 | CG33227  | FBgn0085399 | -                                                  | -                                   | 0.70 |
| BKN28595 | CG4747   | FBgn0043456 | -                                                  | HDGFRP2, GLYR1, PSIP1, HIBADH       | 0.70 |
| BKN24984 | CG15541  | FBgn0085462 | -                                                  | -                                   | 0.70 |
| BKN42505 | CG42330  | FBgn0259232 | Down syndrome cell adhesion molecule 4             | NRCAM, MYLK4, SPEG, NFASC, DSCAM    | 0.70 |
| BKN46515 | CG3756   | FBgn0031657 | -                                                  | POLR1C                              | 0.70 |
| BKN22357 | CG4141   | FBgn0015279 | Pi3K92E                                            | PIK3CB, PIK3CD, PIK3CA, PIK3CG      | 0.70 |
| BKN26990 | CG4875   | FBgn0030801 | Receptor component protein                         | POLR2D, CRCP, ASL                   | 0.70 |
| BKN21636 | CG2252   | FBgn0004656 | female sterile (1) homeotic                        | BRDT, BAZ1A, BAZ2B, CECR2, BRD4, Cc | 0.70 |
| BKN32873 | CG3493   | FBgn0034854 | Golgin-245                                         | GOLGA4, GOLGB1, CENPE, CENPF        | 0.70 |

475 dsRNAs (467 genes) that decrease dPum activity

| BKN#     | CG#      | Flybase_ID  | gene name                                           | human orthologs                      | FF-PRE/Ren ratio |
|----------|----------|-------------|-----------------------------------------------------|--------------------------------------|------------------|
| BKN25067 | CG30053  | FBgn0050053 | -                                                   | -                                    | 2.75             |
| BKN40434 | CG1957   | FBgn0027873 | Cleavage and polyadenylation specificity factor 100 | CPSF2                                | 2.51             |
| BKN30861 | CG13715  | FBgn0035564 | axotactin                                           | SPINT1, CNTNAP4, CNTNAP2, CNTNAP1    | 2.44             |
| BKN20249 | CG18497  | FBgn0016977 | split ends                                          | RBM15B, RBM15, SPEN                  | 2.38             |
| BKN29156 | CG7467   | FBgn0003013 | osa                                                 | ARID3C, ARID3A, ARID1A, ARID4A, ARIC | 2.37             |
| BKN27450 | CG7697   | FBgn0027841 | Cleavage stimulation factor 64 kD subunit           | CSTF2T, CSTF2                        | 2.26             |
| BKN20232 | CG4699   | FBgn0038364 | non-specific lethal 1                               | KANSL1L, KANSL1                      | 2.09             |
| BKN21271 | CG5684   | FBgn0036239 | Pop2                                                | CNOT7, CNOT8                         | 1.98             |
| BKN27909 | CG7055   | FBgn0030093 | Brahma associated protein 111kD                     | SMARCE1                              | 1.98             |
| BKN27752 | CG15112  | FBgn0000578 | enabled                                             | VASP, ENAH, EVL, SPRED3              | 1.97             |
| BKN32717 | CG5442   | FBgn0040286 | SR family splicing factor SC35                      | SRSF12, SRSF2, RBMXL1, SRSF8, RBM^   | 1.97             |
| BKN32049 | CG18371  | FBgn0033893 | -                                                   | ACYP1, ACYP2                         | 1.91             |
| BKN32690 | CG10107  | FBgn0035713 | veloren                                             | SENP6, SENP7, TLR8, CD180, TLR4      | 1.91             |
| BKN31781 | CG18290  | FBgn0000046 | Actin 87E                                           | ACTL7A, POTEI, ACTR10, ACTL10, ACTF  | 1.90             |
| BKN25485 | CG2052   | FBgn0039905 | datilografo                                         | ZBTB48, ZXDB, ZNF362, ZXDA, ZXDC     | 1.88             |
| BKN34554 | HDC14090 | -           | -                                                   | -                                    | 1.86             |
| BKN31691 | CG2368   | FBgn0004399 | pipsqueak                                           | BACH2                                | 1.86             |

|          |          |             |                                                    |                                      |      |
|----------|----------|-------------|----------------------------------------------------|--------------------------------------|------|
| BKN42338 | CG40392  | FBgn0058392 | -                                                  | -                                    | 1.85 |
| BKN31630 | CG15867  | FBgn0085427 | -                                                  | -                                    | 1.84 |
| BKN20344 | CG5942   | FBgn0000212 | brahma                                             | SMARCA4, SMARCA2, HELLS              | 1.84 |
| BKN22809 | CG3242   | FBgn0004892 | sister of odd and bowl                             | ZBTB2, GF11, OSR1, OSR2              | 1.79 |
| BKN31250 | CG17343  | FBgn0032751 | -                                                  | -                                    | 1.78 |
| BKN24343 | CG31714  | FBgn0032180 | -                                                  | ADGRB3                               | 1.78 |
| BKN23222 | CG14796  | FBgn0025390 | Mucin related 2B                                   | MUC16, MUC17, MUC5B, SSPO, MUC4, I   | 1.78 |
| BKN32776 | CG33261  | FBgn0013263 | Trithorax-like                                     | NACC2, ZBTB44, BCL6B, ZBTB46, ZBTB   | 1.77 |
| BKN20604 | CG9005   | FBgn0033638 | -                                                  | FAM214A, FAM214B                     | 1.76 |
| BKN31738 | CG5442   | FBgn0040286 | SR family splicing factor SC35                     | SRSF12, SRSF2, RBMXL1, SRSF8, RBM    | 1.73 |
| BKN33865 | HDC15754 | -           | -                                                  | -                                    | 1.73 |
| BKN41059 | CG40121  | FBgn0058121 | -                                                  | -                                    | 1.73 |
| BKN23928 | CG6765   | FBgn0035903 | -                                                  | ZBTB9                                | 1.73 |
| BKN29161 | CG4027   | FBgn0000042 | Actin 5C                                           | POTEI, ACTR1A, POTE2, ACTG1, ACTL    | 1.72 |
| BKN25474 | CG33230  | FBgn0053230 | -                                                  | SETD6, SETD3, SETD4                  | 1.71 |
| BKN29594 | CG3056   | FBgn0024987 | sister-of-Sex-lethal                               | ELAVL1, ELAVL2, ELAVL3, ELAVL4       | 1.70 |
| BKN23674 | CG5815   | FBgn0027574 | -                                                  | PLD2, SPTY2D1                        | 1.70 |
| BKN33868 | HDC16553 | -           | -                                                  | -                                    | 1.70 |
| BKN45595 | CG7697   | FBgn0027841 | Cleavage stimulation factor 64 kD subunit          | CSTF2T, CSTF2                        | 1.69 |
| BKN22697 | CG33175  | FBgn0085443 | sprint                                             | RIN3, RIN2, RIN1, RINL               | 1.69 |
| BKN23588 | CG18178  | FBgn0036035 | -                                                  | MAK16                                | 1.69 |
| BKN32872 | CG30176  | FBgn0034918 | Partner of Y14 and Mago                            | PYM1                                 | 1.69 |
| BKN21154 | CG7052   | FBgn0041182 | Thioester-containing protein 2                     | CD109, C4A, C4B_2, A2M, C5, A2ML1, C | 1.69 |
| BKN21312 | CG8455   | FBgn0031997 | Post-GPI attachment to proteins 5                  | MPPE1                                | 1.68 |
| BKN33387 | HDC09424 | -           | -                                                  | -                                    | 1.67 |
| BKN33123 | CG15353  | FBgn0040718 | -                                                  | -                                    | 1.67 |
| BKN20229 | CG32677  | FBgn0052677 | X11Lbeta                                           | APBA3, APBA2, APBA1                  | 1.66 |
| BKN45606 | CG10107  | FBgn0035713 | veloren                                            | SENP6, SENP7, TLR8, CD180, TLR4      | 1.66 |
| BKN31641 | CG11742  | FBgn0037594 | Odorant receptor 85d                               | -                                    | 1.66 |
| BKN26243 | CG9792   | FBgn0041711 | yellow-e                                           | DPM3                                 | 1.65 |
| BKN46391 | CG12051  | FBgn0000043 | Actin 42A                                          | ACTL8, ACTRT3, POTEH, ACTR10, ACTL   | 1.64 |
| BKN31268 | CG7334   | FBgn0036191 | Sugar baby                                         | SCN10A, MFSD6, PTGS2, MFSD6L         | 1.63 |
| BKN21288 | CG2097   | FBgn0037371 | Symplekin                                          | SYMPK                                | 1.62 |
| BKN32180 | CG8420   | FBgn0037664 | -                                                  | -                                    | 1.62 |
| BKN21059 | CG5899   | FBgn0032157 | Etl1                                               | SMARCD1                              | 1.61 |
| BKN21910 | CG4303   | FBgn0025463 | Brahma associated protein 60kD                     | SMARCD1, ASIC1, SMARCD3, SMARCD      | 1.61 |
| BKN32909 | CG32077  | FBgn0014368 | no optic lobe                                      | -                                    | 1.61 |
| BKN20241 | CG18811  | FBgn0042134 | Caprin                                             | C1QL1, C1QL4, AMACR, CBLN3, CAPRIN   | 1.60 |
| BKN23252 | CG3044   | FBgn0029913 | Chitinase 11                                       | CHI3L2, OVGP1, CHIT1, CHIA, SRL, CHI | 1.60 |
| BKN33041 | CG12621  | FBgn0032627 | beat-IIIa                                          | CADM2                                | 1.60 |
| BKN33106 | CG8396   | FBgn0015299 | Single stranded-binding protein c31A               | SUB1                                 | 1.59 |
| BKN32786 | CG32404  | FBgn0052404 | Cuticular protein 65Aw                             | -                                    | 1.59 |
| BKN34662 | HDC19986 | -           | -                                                  | -                                    | 1.59 |
| BKN22295 | CG2171   | FBgn0086355 | Triose phosphate isomerase                         | TPI1                                 | 1.59 |
| BKN41659 | CG34167  | FBgn0085196 | -                                                  | KRTAP5-6                             | 1.58 |
| BKN29113 | CG1983   | FBgn0039751 | -                                                  | PROSC                                | 1.58 |
| BKN20534 | CG7698   | FBgn0038636 | Cleavage and polyadenylation specificity factor 73 | CPSF3L, CPSF3                        | 1.58 |
| BKN46312 | CG16772  | FBgn0032835 | -                                                  | -                                    | 1.58 |
| BKN22098 | CG7144   | FBgn0025687 | Lysine ketoglutarate reductase/saccharopine dehydr | AASS                                 | 1.57 |
| BKN32796 | CG31629  | FBgn0085407 | PDGF- and VEGF-related factor 3                    | -                                    | 1.57 |
| BKN20794 | CG10653  | FBgn0001202 | hook                                               | HOOK3, HOOK1, HOOK2                  | 1.57 |
| BKN34645 | HDC14458 | -           | -                                                  | -                                    | 1.56 |
| BKN33839 | HDC14293 | -           | -                                                  | -                                    | 1.56 |
| BKN22341 | CG6181   | FBgn0032340 | Ge-1                                               | EDC4                                 | 1.56 |
| BKN20265 | CG3634   | FBgn0037026 | -                                                  | ST7L, ST7                            | 1.55 |
| BKN20582 | CG15014  | FBgn0035532 | -                                                  | THUMPD1                              | 1.55 |
| BKN25664 | CG31826  | FBgn0051826 | -                                                  | RLBP1, CLVS1, CLVS2, TTPAL, SEC14L1  | 1.54 |
| BKN27684 | CG10967  | FBgn0010715 | Autophagy-related 1                                | ULK2, ULK3, PDIK1L, STK35, ULK1      | 1.54 |
| BKN22201 | CG6084   | FBgn0086254 | -                                                  | AKR1C3, AKR1C4, AKR1A1, AKR1D1, AK   | 1.54 |
| BKN32935 | CG4312   | FBgn0002869 | Metallothionein B                                  | -                                    | 1.54 |
| BKN30471 | CG1143   | FBgn0035359 | -                                                  | -                                    | 1.54 |
| BKN34457 | HDC10902 | -           | -                                                  | -                                    | 1.54 |

|          |          |             |                                                         |                                     |      |
|----------|----------|-------------|---------------------------------------------------------|-------------------------------------|------|
| BKN29340 | CG7736   | FBgn0037084 | Syntaxin 6                                              | STX6, STX8, STX10                   | 1.54 |
| BKN22318 | CG10078  | FBgn0041194 | Phosphoribosylamidotransferase 2                        | PPAT                                | 1.53 |
| BKN40127 | CG33671  | FBgn0061359 | -                                                       | MVK                                 | 1.53 |
| BKN20850 | CG10542  | FBgn0086694 | Bre1                                                    | RNF20, PEX10, TRIM39, RNF5, RNF185, | 1.53 |
| BKN29389 | CG6153   | FBgn0032445 | -                                                       | PITHD1                              | 1.53 |
| BKN24862 | CG4399   | FBgn0010110 | enhanced adult sensory threshold                        | -                                   | 1.53 |
| BKN29721 | CG14636  | FBgn0037217 | -                                                       | -                                   | 1.52 |
| BKN20230 | CG17018  | FBgn0039972 | -                                                       | KIAA0430                            | 1.52 |
| BKN24621 | CG10124  | FBgn0035709 | eukaryotic translation initiation factor 4E4            | SESN3, EIF4E1B, SESN1, SESN2, EIF4E | 1.51 |
| BKN26032 | CG5409   | FBgn0011743 | Actin-related protein 53D                               | POTEJ, ACTB, POTE, ACTRT1, ACTR8,   | 1.51 |
| BKN22845 | CG8734   | FBgn0033315 | Galactosyltransferase II                                | B3GALT6, B3GALNT2                   | 1.51 |
| BKN28039 | CG1467   | FBgn0031106 | Syntaxin 16                                             | STX7, STX16, STX12                  | 1.51 |
| BKN31533 | CG30354  | FBgn0050354 | Ubiquinol-cytochrome c reductase 11 kDa subunit-like    | UQCRH, UQCRHL                       | 1.51 |
| BKN27774 | CG7062   | FBgn0015793 | Rab19                                                   | RAB33B, RAB12, RABL6, RAB1B, RAB19  | 1.51 |
| BKN30809 | CG3119   | FBgn0031466 | -                                                       | C1GALT1, C1GALT1C1                  | 1.50 |
| BKN29150 | CG9220   | FBgn0030662 | -                                                       | CHSY3, CSGALNACT2, CSGALNACT1, C    | 1.50 |
| BKN22352 | CG4376   | FBgn0000667 | alpha actinin                                           | SPTAN1, SPTBN1, SPTBN2, ACTN3, GA   | 1.50 |
| BKN45210 | CG17122  | FBgn0036962 | -                                                       | CFAP157                             | 1.50 |
| BKN42426 | CG12997  | FBgn0030831 | -                                                       | -                                   | 1.49 |
| BKN22638 | CG6510   | FBgn0010409 | Ribosomal protein L18A                                  | RPL18A                              | 1.49 |
| BKN22374 | CG10011  | FBgn0039590 | -                                                       | CTTNBP2, ANKRD50                    | 1.49 |
| BKN45137 | CG5874   | FBgn0038872 | Negative elongation factor A                            | NELFA                               | 1.49 |
| BKN25256 | CG15445  | FBgn0031161 | -                                                       | NUB1                                | 1.49 |
| BKN29402 | CG10652  | FBgn0086710 | Ribosomal protein L30                                   | RPL30                               | 1.49 |
| BKN22515 | CG32133  | FBgn0052133 | PAX transcription activation domain interacting protein | MDC1, PAXIP1                        | 1.49 |
| BKN26785 | CG10183  | FBgn0039093 | -                                                       | -                                   | 1.48 |
| BKN34530 | HDC09489 | -           | -                                                       | -                                   | 1.48 |
| BKN34258 | HDC08564 | -           | -                                                       | -                                   | 1.48 |
| BKN41528 | CR34623  | FBgn0082957 | snoRNA:Psi28S-3405d                                     | -                                   | 1.48 |
| BKN40461 | CG42236  | FBgn0250861 | Ran-binding protein M                                   | SPRYD3, RANBP10, RANBP9             | 1.48 |
| BKN42498 | CG33774  | FBgn0053774 | -                                                       | OST4                                | 1.48 |
| BKN29268 | CG8529   | FBgn0033739 | Dystrobrevin                                            | DTNA, TUSC1, DTNB, DRP2             | 1.48 |
| BKN40384 | CG41603  | FBgn0085719 | -                                                       | -                                   | 1.47 |
| BKN27682 | CG4867   | FBgn0040239 | bc10                                                    | BLCAP                               | 1.47 |
| BKN24746 | CG13310  | FBgn0035928 | -                                                       | -                                   | 1.46 |
| BKN28569 | CG3412   | FBgn0023423 | supernumerary limbs                                     | FBXW7, DAW1, WDR64, BTRC, FBXW11    | 1.46 |
| BKN33080 | CG2941   | FBgn0029686 | -                                                       | -                                   | 1.46 |
| BKN22983 | CG10161  | FBgn0040227 | eukaryotic translation initiation factor 3 subunit d1   | EIF3D                               | 1.46 |
| BKN21266 | CG11025  | FBgn0028372 | isopeptidase-T-3                                        | UBAC1                               | 1.46 |
| BKN28958 | CG18214  | FBgn0024277 | trio                                                    | SESTD1, MCF2, ARHGEF25, PLEKHG4B    | 1.45 |
| BKN22414 | CG4698   | FBgn0010453 | Wnt oncogene analog 4                                   | WNT6, WNT10A, WNT9B, WNT8A, WNT3    | 1.45 |
| BKN29931 | CG1322   | FBgn0004606 | Zn finger homeodomain 1                                 | ZEB1, MECOM, ZNF853, ZNF91, ZNF236  | 1.45 |
| BKN20215 | CG7861   | FBgn0033055 | Tubulin-specific chaperone E                            | TBCE, TBCEL                         | 1.45 |
| BKN27824 | CG5020   | FBgn0020503 | Cytoplasmic linker protein 190                          | NBPF8, NBPF1, NBPF3, MMRN2, CCDC2   | 1.45 |
| BKN23056 | CG6439   | FBgn0038922 | Isocitrate dehydrogenase 3b                             | IDH3A, IDH3B, IDH3G                 | 1.45 |
| BKN27884 | CG2006   | FBgn0039664 | -                                                       | DTWD1                               | 1.45 |
| BKN29394 | CG1975   | FBgn0028408 | DNA fragmentation factor-related protein 2              | CIDEA, CIDE, DFFA, CIDEB            | 1.45 |
| BKN20278 | CG15270  | FBgn0028879 | -                                                       | ANO5, ANO10, ANO8, ANO4, ANO7, ANC  | 1.44 |
| BKN40323 | CR33221  | FBgn0053221 | -                                                       | -                                   | 1.44 |
| BKN28294 | CG10603  | FBgn0032720 | mitochondrial ribosomal protein L13                     | MRPL13                              | 1.44 |
| BKN24250 | CG31224  | FBgn0051224 | -                                                       | FIZ1, ZBTB44, ZNF579, ZNF618        | 1.44 |
| BKN29052 | CG7807   | FBgn0023417 | Transcription factor AP-2                               | TFAP2C, TFAP2D, TFAP2E, TFAP2B, TF/ | 1.44 |
| BKN32894 | CG10910  | FBgn0034289 | -                                                       | CDA, MAGED4, MAGED2, MAGED1, MAC    | 1.44 |
| BKN27861 | CG11166  | FBgn0033166 | ELL-associated factor                                   | EAF1, EAF2                          | 1.43 |
| BKN21775 | CG9854   | FBgn0015949 | hiiragi                                                 | PAPOLA, PAPOLG, PAPOLB              | 1.43 |
| BKN30397 | CG1648   | FBgn0033446 | -                                                       | PLIN3, PLIN1, PLIN5, ADIRF, PLIN2   | 1.43 |
| BKN40206 | CR42954  | FBgn0046818 | mir-6-2 stem loop                                       | -                                   | 1.42 |
| BKN40307 | CR32618  | FBgn0011981 | transfer RNA:Serine-AGA 3-2                             | -                                   | 1.42 |
| BKN45785 | CG43225  | FBgn0035564 | axotactin                                               | SPINT1, CNTNAP4, CNTNAP2, CNTNAP1   | 1.42 |
| BKN27766 | CG9921   | FBgn0030743 | -                                                       | HIGD2A, HIGD1B, HIGD1A, HIGD1C      | 1.42 |
| BKN32968 | CG15470  | FBgn0029731 | -                                                       | KCNK2, KCNK16, KCNK7, KCNK5, KCNK   | 1.42 |
| BKN33728 | HDC05690 | -           | -                                                       | -                                   | 1.42 |

|          |          |             |                                                       |                                         |      |
|----------|----------|-------------|-------------------------------------------------------|-----------------------------------------|------|
| BKN22300 | CG9915   | FBgn0030738 | -                                                     | IWS1                                    | 1.42 |
| BKN21305 | CG32705  | FBgn0085479 | -                                                     | -                                       | 1.41 |
| BKN33070 | CG15461  | FBgn0040649 | -                                                     | -                                       | 1.41 |
| BKN42285 | CG6783   | FBgn0037913 | fatty acid binding protein                            | RBP2, FABP4, FABP1, RBP5, FABP5, FAI    | 1.41 |
| BKN28859 | CG7007   | FBgn0028662 | Vacuolar H[+] ATPase PPA1 subunit 1                   | ATP6V0B                                 | 1.41 |
| BKN42530 | CG34176  | FBgn0085205 | -                                                     | -                                       | 1.41 |
| BKN23191 | CG15390  | FBgn0031419 | -                                                     | MTERF4                                  | 1.41 |
| BKN20592 | CG17256  | FBgn0029970 | Nek2                                                  | NEK7, NEK4, NEK2, NEK11, NEK8, STKL     | 1.41 |
| BKN29048 | CG9755   | FBgn0003165 | pumilio                                               | PUM1, PUM2                              | 1.41 |
| BKN34012 | HDC02762 | -           | -                                                     | -                                       | 1.41 |
| BKN30191 | CG10571  | FBgn0015904 | araucan                                               | IRX6, MEIS1, TGIF2, IRX4, IRX2, IRX5, T | 1.41 |
| BKN42552 | CG18160  | FBgn0039980 | -                                                     | -                                       | 1.41 |
| BKN30894 | CG15279  | FBgn0028886 | -                                                     | SLC6A5, SLC6A9, SLC6A17, SLC6A20, S     | 1.40 |
| BKN32994 | CG10843  | FBgn0033397 | Cyp4p3                                                | CYP4A22, CYP4A11, CYP20A1, CYP4F11      | 1.40 |
| BKN32014 | CG17622  | FBgn0038998 | wide awake                                            | ANKFN1                                  | 1.40 |
| BKN20290 | CG31937  | FBgn0031360 | -                                                     | HSD11B1L, RDH8, ELOVL7, HSD17B1, D      | 1.40 |
| BKN22416 | CG7050   | FBgn0038975 | Neurexin 1                                            | NRXN2, NRXN3, NRXN1                     | 1.40 |
| BKN27772 | CG2812   | FBgn0034931 | -                                                     | WDR47                                   | 1.40 |
| BKN33107 | CG5539   | FBgn0034907 | -                                                     | REEP3, REEP4, REEP2, REEP1              | 1.40 |
| BKN22692 | CG16947  | FBgn0031816 | -                                                     | RCHY1                                   | 1.40 |
| BKN23716 | CG10217  | FBgn0039113 | -                                                     | -                                       | 1.40 |
| BKN21664 | CG7471   | FBgn0015805 | Histone deacetylase 1                                 | HDAC1, HDAC3, HDAC8, HDAC2              | 1.40 |
| BKN31779 | CG12479  | FBgn0040871 | -                                                     | MINOS1, MINOS1-NBL1                     | 1.40 |
| BKN28625 | CG10233  | FBgn0087005 | retinophilin                                          | MORN1, JPH1, MORN3, RSPH10B2, RSF       | 1.40 |
| BKN45970 | CG2903   | FBgn0031450 | Hepatocyte growth factor regulated tyrosine kinase su | ZFYVE19, GGA1, GGA3, TOM1L2, ZFYVE      | 1.40 |
| BKN20292 | CG1848   | FBgn0041203 | LIM domain kinase 1                                   | MAP3K21, LIMK2, LRRK1, TESK2, LIMK1     | 1.39 |
| BKN42402 | CG41325  | FBgn0085615 | -                                                     | -                                       | 1.39 |
| BKN34390 | HDC19711 | -           | -                                                     | -                                       | 1.39 |
| BKN30630 | CG5738   | FBgn0022238 | lola like                                             | ZBTB43, ZBTB9, ZBTB37, ZBTB12           | 1.39 |
| BKN28710 | CG2099   | FBgn0037328 | Ribosomal protein L35A                                | RPL35A                                  | 1.39 |
| BKN32480 | CG9656   | FBgn0001138 | grain                                                 | GATA5, TRPS1, ZGLP1, GATA1, GATA6,      | 1.39 |
| BKN33928 | HDC10263 | -           | -                                                     | -                                       | 1.39 |
| BKN30046 | CG13011  | FBgn0030771 | singles bar                                           | CMTM2, CMTM1, CMTM7, CMTM3, CKLF        | 1.39 |
| BKN45374 | CG10177  | FBgn0039083 | -                                                     | DCLK1, DAPK2, OBSCN, DAPK1, MYLK3       | 1.39 |
| BKN28734 | CG3195   | FBgn0034968 | Ribosomal protein L12                                 | RPL12                                   | 1.39 |
| BKN41904 | CG41481  | FBgn0084041 | -                                                     | -                                       | 1.39 |
| BKN28711 | CG1475   | FBgn0037351 | Ribosomal protein L13A                                | RPL13A                                  | 1.39 |
| BKN26278 | CG3331   | FBgn0000527 | ebony                                                 | AASDH                                   | 1.39 |
| BKN34006 | HDC02763 | -           | -                                                     | -                                       | 1.38 |
| BKN24775 | CG15780  | FBgn0250904 | -                                                     | MYL1, MYL6, MYL6B, MYL4, MYL3           | 1.38 |
| BKN32575 | CG5596   | FBgn0002772 | Myosin alkali light chain 1                           | MYL6, MYL4, MYL6B, MYL1, MYL3           | 1.38 |
| BKN22604 | CG18735  | FBgn0042098 | -                                                     | PRSS1, CELA3A, TMPRSS4, PRSS3, ST1      | 1.38 |
| BKN34076 | HDC02764 | FBgn0085196 | -                                                     | -                                       | 1.38 |
| BKN32676 | CG14358  | FBgn0038199 | CCHamide-1                                            | -                                       | 1.38 |
| BKN27102 | CG15765  | FBgn0029814 | -                                                     | LINC00083                               | 1.38 |
| BKN28468 | CG7018   | FBgn0005658 | Ets at 65A                                            | ERF, ETS2, GABPA, ELK4, ETV4, ETS1, I   | 1.37 |
| BKN32013 | CR33749  | FBgn0065104 | small non-messenger RNA 158                           | -                                       | 1.37 |
| BKN26287 | CG14853  | FBgn0038246 | -                                                     | ERICH2                                  | 1.37 |
| BKN40951 | CR32287  | FBgn0052287 | transfer RNA:Cysteine-GCA 1-3                         | -                                       | 1.37 |
| BKN26394 | CG6792   | FBgn0032401 | Promyelocytic leukemia zinc finger                    | ZBTB38, ZBTB42, ZBTB14, ZBTB2, ZBTB     | 1.37 |
| BKN45892 | CG11236  | FBgn0031860 | -                                                     | DDO, DAO, METTL24                       | 1.37 |
| BKN28748 | CG6563   | FBgn0038306 | Arginine methyltransferase 3                          | PRMT2, ETFBKMT, NDUFAF5, PRMT3, P       | 1.37 |
| BKN24908 | CG8290   | FBgn0026573 | ADD domain-containing protein 1                       | DNMT3A, DNMT3L, ATRX, DNMT3B            | 1.37 |
| BKN31245 | CG4220   | FBgn0004858 | elbow B                                               | ZNF703, ZNF503                          | 1.37 |
| BKN28599 | CG12054  | FBgn0039831 | -                                                     | JAZF1                                   | 1.37 |
| BKN25902 | CG16940  | FBgn0035111 | Dis3 like 3'-5' exoribonuclease 2                     | DIS3L2, HELZ2, DIS3, DIS3L              | 1.37 |
| BKN24602 | CG15889  | FBgn0038128 | Ravus                                                 | -                                       | 1.37 |
| BKN33711 | HDC02932 | FBgn0032631 | -                                                     | -                                       | 1.37 |
| BKN32738 | CG32240  | FBgn0052240 | -                                                     | -                                       | 1.37 |
| BKN45854 | CG8310   | FBgn0040377 | Vacuolar H[+] ATPase 36kD subunit 3                   | ATP6V1D                                 | 1.37 |
| BKN31226 | CG13947  | FBgn0031277 | -                                                     | -                                       | 1.37 |
| BKN28383 | CG8639   | FBgn0033313 | Calcium-independent receptor for alpha-latrotoxin     | ADGRL1, ADGRF4, ADGRE3, EVA1C, CF       | 1.37 |

|          |          |             |                                                   |                                      |      |
|----------|----------|-------------|---------------------------------------------------|--------------------------------------|------|
| BKN28712 | CG3717   | FBgn0013432 | bcn92                                             | LYRM4                                | 1.37 |
| BKN27944 | CG5676   | FBgn0032200 | -                                                 | FUNDC1, FUNDC2                       | 1.37 |
| BKN40293 | CG43443  | FBgn0085226 | hu li tai shao                                    | ADD3, ADD2, ADD1                     | 1.36 |
| BKN22471 | CG7793   | FBgn0001965 | Son of sevenless                                  | RASGRF2, RAPGEF1, RASGRP2, RASGE     | 1.36 |
| BKN24414 | CG17453  | FBgn0033982 | Cyp317a1                                          | CYP3A43, TBXAS1, PTGIS, CYP3A5, CYF  | 1.36 |
| BKN31419 | CG4710   | FBgn0016926 | Pinocchio                                         | -                                    | 1.36 |
| BKN26752 | CG30170  | FBgn0004581 | benign gonial cell neoplasm                       | DHX37, DHX30, TDRD9, DHX9, DHX57, Y  | 1.36 |
| BKN28210 | CG3582   | FBgn0017457 | U2 small nuclear riboprotein auxiliary factor 38  | ZRSR2, U2AF1L4, U2AF1, U2AF1L5       | 1.36 |
| BKN34351 | HDC09245 | -           | -                                                 | -                                    | 1.36 |
| BKN31981 | CG16791  | FBgn0038881 | -                                                 | -                                    | 1.36 |
| BKN45857 | CG32240  | FBgn0052240 | -                                                 | -                                    | 1.36 |
| BKN20245 | CG8266   | FBgn0033339 | Secretory 31                                      | SEC31A, SEC31B                       | 1.36 |
| BKN28708 | CG7048   | FBgn0038976 | Prefoldin 5                                       | PFDN5                                | 1.36 |
| BKN33623 | HDC15759 | -           | -                                                 | -                                    | 1.36 |
| BKN21653 | CG1064   | FBgn0011715 | Snf5-related 1                                    | SMARCB1                              | 1.36 |
| BKN40036 | CG17665  | FBgn0039997 | Integrator 3                                      | INTS3, NPR1, NPR2                    | 1.35 |
| BKN29392 | CG4205   | FBgn0011769 | Ferredoxin 1                                      | FDX1, FDX1L, COX15                   | 1.35 |
| BKN22598 | CG2746   | FBgn0002607 | Ribosomal protein L19                             | RPL19                                | 1.35 |
| BKN45672 | CG33485  | FBgn0038282 | defective proboscis extension response 9          | -                                    | 1.35 |
| BKN40695 | CG5172   | FBgn0030830 | -                                                 | -                                    | 1.35 |
| BKN25648 | CG11280  | FBgn0010452 | tartan                                            | BGN, LRRC70, LRRN3, CPN2, LRFN1, LF  | 1.35 |
| BKN32844 | CG13578  | FBgn0035000 | -                                                 | -                                    | 1.35 |
| BKN32752 | CG10205  | FBgn0033970 | -                                                 | -                                    | 1.35 |
| BKN25154 | CG14317  | FBgn0038566 | -                                                 | -                                    | 1.35 |
| BKN32537 | CG3361   | FBgn0039507 | martik                                            | -                                    | 1.34 |
| BKN21326 | CG1818   | FBgn0033428 | Updo                                              | UROD                                 | 1.34 |
| BKN24535 | CG31975  | FBgn0051975 | -                                                 | -                                    | 1.34 |
| BKN20340 | CG10354  | FBgn0031868 | Rat1 5'-3' exoribonuclease                        | XRN1, XRN2                           | 1.34 |
| BKN22447 | CG9207   | FBgn0031873 | Gas41                                             | MLLT3, YEATS2, MLLT1, YEATS4         | 1.34 |
| BKN32793 | CG12384  | FBgn0033624 | -                                                 | DAPL1, DAP                           | 1.34 |
| BKN42580 | CG18773  | FBgn0020643 | Lcp65Ab2                                          | -                                    | 1.34 |
| BKN45919 | CG3708   | FBgn0040345 | -                                                 | NAP1L4, NAP1L2, NAP1L5, NAP1L1, NAF  | 1.34 |
| BKN28740 | CG17252  | FBgn0026149 | BCL7-like                                         | BCL7B, BCL7C, BCL7A                  | 1.34 |
| BKN34016 | HDC02979 | -           | -                                                 | -                                    | 1.34 |
| BKN30769 | CG13252  | FBgn0037016 | -                                                 | OTOGL, VWCE, NELL2, NELL1, FRAS1, C  | 1.34 |
| BKN28452 | CG2014   | FBgn0039669 | NADH dehydrogenase (ubiquinone) 20 kDa subunit-li | NDUFS7                               | 1.34 |
| BKN22501 | CG7456   | FBgn0032258 | -                                                 | COG4                                 | 1.34 |
| BKN28706 | CG4254   | FBgn0011726 | twinstar                                          | CFL1, CFL2, DSTN                     | 1.34 |
| BKN29229 | CG10751  | FBgn0024196 | roadblock                                         | DYNLRB1, DYNLRB2                     | 1.34 |
| BKN40612 | CG11919  | FBgn0033564 | Peroxin 6                                         | PEX6                                 | 1.33 |
| BKN29437 | CG9578   | FBgn0031094 | -                                                 | TIPRL                                | 1.33 |
| BKN22290 | CG31753  | FBgn0045852 | hamlet                                            | ZNF85, ZNF605, ZNF808, ZFP62, ZNF721 | 1.33 |
| BKN29849 | CG14035  | FBgn0031685 | Muscle-specific protein 300 kDa                   | SMTNL2, SYNE2, MACF1, EVPLL, SMTNI   | 1.33 |
| BKN29393 | CG11654  | FBgn0014455 | Adenosylhomocysteinase                            | AHCYL1, AHCY, AHCYL2                 | 1.33 |
| BKN33083 | CG5630   | FBgn0038842 | hadley                                            | -                                    | 1.33 |
| BKN31818 | CG15286  | FBgn0028531 | -                                                 | KCMF1                                | 1.33 |
| BKN33120 | CG15489  | FBgn0085424 | nubbin                                            | POU6F2, POU3F1, POU1F1, POU5F2, PC   | 1.33 |
| BKN42277 | CG33242  | FBgn0053242 | Ste:CG33242                                       | CSNK2B                               | 1.33 |
| BKN28784 | CG4921   | FBgn0016701 | Rab4                                              | RAB2A, MIA, RAB14, EGLN2, RAB4A, RA  | 1.33 |
| BKN45347 | CG5942   | FBgn0000212 | brahma                                            | SMARCA4, SMARCA2, HELLS              | 1.33 |
| BKN32129 | CG13594  | FBgn0035041 | -                                                 | -                                    | 1.33 |
| BKN41139 | CG9369   | FBgn0002577 | miniature                                         | -                                    | 1.33 |
| BKN40319 | CG33718  | FBgn0044419 | Pmi                                               | TMEM11                               | 1.33 |
| BKN20860 | CG8233   | FBgn0033897 | Reduction in Cnn dots 1                           | KANSL3                               | 1.33 |
| BKN41706 | CG41312  | FBgn0085608 | -                                                 | -                                    | 1.33 |
| BKN27320 | CG5445   | FBgn0030838 | -                                                 | NBR1, C6orf106                       | 1.33 |
| BKN40660 | CG33251  | FBgn0053251 | -                                                 | -                                    | 1.33 |
| BKN23731 | CG10192  | FBgn0260634 | eukaryotic translation initiation factor 4G2      | EIF4G1, EIF4G2, EIF4G3               | 1.33 |
| BKN25688 | CG15179  | FBgn0037462 | sungazer                                          | CIB1, CHP2, CIB4, EFCAB1, TESC, PPP3 | 1.33 |
| BKN21075 | CG17369  | FBgn0005671 | Vacuolar H[+]-ATPase 55kD subunit                 | ATP6V1B2, ATP6V1B1                   | 1.32 |
| BKN33108 | CG17086  | FBgn0032310 | SET and MYND domain containing, arthropod-specifi | SMYD4, ERLIN1, SMYD5, SMYD3, SMYD    | 1.32 |
| BKN40074 | CR40573  | FBgn0085748 | -                                                 | -                                    | 1.32 |



|          |          |             |                                             |                                          |      |
|----------|----------|-------------|---------------------------------------------|------------------------------------------|------|
| BKN33172 | CG14063  | FBgn0040618 | -                                           | -                                        | 1.32 |
| BKN45165 | CG3350   | FBgn0039509 | bigmax                                      | MLX                                      | 1.32 |
| BKN21682 | CG12121  | FBgn0030109 | -                                           | GPR107, GPR108                           | 1.32 |
| BKN24651 | CG9668   | FBgn0003250 | Rhodopsin 4                                 | RGR, OPN1MW3, OPN3, RRR, OPN4, R         | 1.32 |
| BKN31559 | CG31206  | FBgn0051206 | -                                           | -                                        | 1.32 |
| BKN33235 | CG18336  | FBgn0040763 | -                                           | FAM166B, FAM166A                         | 1.32 |
| BKN28864 | CG8186   | FBgn0022097 | Vacuolar H[+] ATPase 36kD subunit 1         | ATP6V1D                                  | 1.32 |
| BKN23235 | CG32790  | FBgn0052790 | -                                           | ST18, MYT1L, MYT1                        | 1.32 |
| BKN29239 | CG14213  | FBgn0031047 | Required for cell differentiation 1         | CNOT9                                    | 1.32 |
| BKN21289 | CG4039   | FBgn0025815 | Minichromosome maintenance 6                | MCM6, MCM8, MCMD2C                       | 1.32 |
| BKN30826 | CG31699  | FBgn0051699 | -                                           | -                                        | 1.32 |
| BKN28208 | CG2972   | FBgn0030177 | -                                           | NOB1                                     | 1.32 |
| BKN28772 | CG7041   | FBgn0030082 | Heterochromatin Protein 1b                  | CBX3, C15orf57, CDY1, CDY2A, CDY1B,      | 1.32 |
| BKN21416 | CG6046   | FBgn0024491 | Bicoid interacting protein 1                | SAP18                                    | 1.31 |
| BKN21008 | CG11396  | FBgn0037022 | -                                           | TRAPPC12                                 | 1.31 |
| BKN34089 | HDC05888 | -           | -                                           | -                                        | 1.31 |
| BKN27811 | CG33096  | FBgn0053096 | -                                           | ABHD13, ABHD12, ABHD17B, ABHD17A,        | 1.31 |
| BKN28204 | CG11137  | FBgn0037199 | -                                           | EMC4                                     | 1.31 |
| BKN24777 | CG8029   | FBgn0033393 | Vacuolar H[+] ATPase AC45 accessory subunit | ATP6AP1, ATP6AP1L                        | 1.31 |
| BKN34516 | HDC08154 | -           | -                                           | -                                        | 1.30 |
| BKN27800 | CG6030   | FBgn0016120 | ATP synthase, subunit D                     | ATP5H                                    | 1.30 |
| BKN28127 | CG32343  | FBgn0052343 | Ada2a-containing complex component 3        | FLJ10038, ANKRD62, DDX54, GABPB2         | 1.30 |
| BKN29023 | CG9610   | FBgn0003129 | Pox meso                                    | PAX4, PAX1, ARX, PAX8, PAX5, PAX6, P,    | 1.30 |
| BKN46240 | CG5969   | FBgn0036998 | -                                           | QPCT, QPCTL, VMA21                       | 1.30 |
| BKN34086 | HDC07596 | -           | -                                           | -                                        | 1.30 |
| BKN27767 | CG4247   | FBgn0038307 | mitochondrial ribosomal protein S10         | MRPS10                                   | 1.30 |
| BKN21387 | CG5300   | FBgn0032243 | Kinesin-like protein at 31E                 | KIF21B, KIF7, KIF4A, KIF4B, KIF21A, KIF2 | 1.30 |
| BKN24399 | CG14537  | FBgn0031954 | -                                           | -                                        | 1.30 |
| BKN29718 | CG2302   | FBgn0015519 | nicotinic Acetylcholine Receptor alpha3     | CHRNA7, CHRNB3, CHRNA5, CHRNA6, C        | 1.30 |
| BKN29341 | CG4581   | FBgn0025352 | Thiolase                                    | HADHB                                    | 1.30 |
| BKN29815 | CG8301   | FBgn0037717 | -                                           | ZNF560, ZBTB41, ZNF782                   | 1.30 |
| BKN33078 | CG7118   | FBgn0035886 | Jonah 66Ci                                  | PROC, C1S, KLK3                          | 1.30 |
| BKN34060 | HDC14891 | -           | -                                           | -                                        | 1.30 |
| BKN40622 | CG45784  | FBgn0058204 | Myosin 81F                                  | -                                        | 1.30 |
| BKN29623 | CG10481  | FBgn0032827 | -                                           | XPR1                                     | 1.30 |
| BKN28502 | CG8841   | FBgn0033713 | -                                           | HID1                                     | 1.30 |
| BKN40020 | CG43744  | FBgn0085272 | bruno 3                                     | CELF3, CELF6, CELF2, CELF4, CELF1, C     | 1.30 |
| BKN30880 | CG12653  | FBgn0000233 | buttonhead                                  | EGR1, ZNF526, SP7, SP8, EGR3, SP9, SI    | 1.30 |
| BKN32444 | CG14968  | FBgn0035431 | -                                           | LDLRAP1                                  | 1.29 |
| BKN40656 | CG8201   | FBgn0026193 | par-1                                       | MARK2, MARK3, MARK4, MARK1, SIK3, S      | 1.29 |
| BKN24753 | CG8172   | FBgn0033362 | -                                           | PRSS21, CTRC, CTRL, PRSS48, TMPRSS       | 1.29 |
| BKN22505 | CG4306   | FBgn0036787 | -                                           | GGCT                                     | 1.29 |
| BKN46603 | CG32829  | FBgn0052829 | -                                           | -                                        | 1.29 |
| BKN22129 | CG4972   | FBgn0032217 | -                                           | NCLN                                     | 1.29 |
| BKN22651 | CG1665   | FBgn0033451 | -                                           | MARC2, MARC1                             | 1.29 |
| BKN24717 | CG9731   | FBgn0037640 | polychaetoid                                | TJP2, TJP1, TJP3                         | 1.29 |
| BKN25491 | CG3508   | FBgn0038251 | Hexamethylene bisacetamide inducible        | HEXIM1, HEXIM2                           | 1.29 |
| BKN29020 | CG11824  | FBgn0085379 | Notopleural                                 | CELA2A, TMPRSS13, CELA1, GZMA, GZI       | 1.29 |
| BKN46587 | CG43720  | FBgn0032825 | sickie                                      | NAV1, NAV2, NAV3                         | 1.29 |
| BKN46006 | CG10641  | FBgn0032731 | Swiprosin-1                                 | EFHD2, EFHD1                             | 1.29 |
| BKN22438 | CG3314   | FBgn0014026 | Ribosomal protein L7A                       | RPL7A                                    | 1.29 |
| BKN23627 | CG14528  | FBgn0039611 | -                                           | MME, KEL, ECE1, ECEL1, MMEL1, ECE2       | 1.29 |
| BKN33084 | CG32985  | FBgn0052985 | -                                           | -                                        | 1.29 |
| BKN24690 | CG13868  | FBgn0034501 | -                                           | -                                        | 1.29 |
| BKN28474 | CG13213  | FBgn0033609 | F-box and leucine-rich repeat protein 6     | FBXL19, LRRC29, KDM2A, FBXL4, KDM2       | 1.29 |
| BKN29614 | CG17272  | FBgn0038830 | -                                           | CALN1, CALB1, OCM2, CALM2, CABP5, I      | 1.29 |
| BKN46586 | CG12672  | FBgn0030886 | -                                           | -                                        | 1.29 |
| BKN40315 | CG33717  | FBgn0260458 | Peptidoglycan recognition protein LD        | PGLYRP2, PGLYRP4, PGLYRP1, PGLYR         | 1.29 |
| BKN27926 | CG9882   | FBgn0034817 | Arginine methyltransferase 7                | PRMT7                                    | 1.29 |
| BKN45590 | CG3740   | FBgn0023530 | -                                           | C19orf12                                 | 1.28 |
| BKN29220 | CG9852   | FBgn0010340 | upstream of Rp11140                         | TIMMDC1                                  | 1.28 |
| BKN30136 | CG30320  | FBgn0050320 | -                                           | -                                        | 1.28 |

|          |          |             |                                              |                                      |      |
|----------|----------|-------------|----------------------------------------------|--------------------------------------|------|
| BKN20900 | CG17360  | FBgn0037949 | -                                            | PLEKHM2                              | 1.28 |
| BKN20486 | CG11305  | FBgn0039631 | Sirtuin 7                                    | SIRT7, SIRT6                         | 1.28 |
| BKN42399 | CR12798  | FBgn0039987 | -                                            | -                                    | 1.28 |
| BKN29380 | CG10076  | FBgn0003475 | spire                                        | SPIRE1, SPIRE2                       | 1.28 |
| BKN33135 | CG1442   | FBgn0039622 | eukaryotic translation initiation factor 4E6 | SESN3, SESN1, EIF4E3, EIF4E, EIF4E1B | 1.28 |
| BKN41807 | CG12552  | FBgn0040004 | -                                            | -                                    | 1.28 |
| BKN22541 | CG5429   | FBgn0010709 | Autophagy-related 6                          | BECN1, BECN2                         | 1.28 |
| BKN28547 | CG9091   | FBgn0030616 | Ribosomal protein L37a                       | RPL37                                | 1.28 |
| BKN30223 | CG12330  | FBgn0035686 | Cuticular protein 65Az                       | -                                    | 1.28 |
| BKN20022 | CG11796  | FBgn0036992 | -                                            | HIP1R, HIP1, HPDL, HPD               | 1.28 |
| BKN20016 | CG7516   | FBgn0028529 | lethal (2) 34Fd                              | NOL10                                | 1.28 |
| BKN28933 | CG17248  | FBgn0013342 | neuronal Synaptobrevin                       | VAMP2, VAMP8, VAMP3, VAMP4, VAMP5    | 1.28 |
| BKN21997 | CG11148  | FBgn0039936 | Gigyf                                        | GIGYF1, GIGYF2                       | 1.28 |
| BKN28794 | CG5701   | FBgn0036980 | Rho-related BTB domain containing            | CDC42, RAC3, RHOBTB1, RHOD, RHOB     | 1.28 |
| BKN41927 | CG8669   | FBgn0000370 | cryptocephal                                 | ATF5, ATF4                           | 1.28 |
| BKN20242 | CG3637   | FBgn0025865 | Cortactin                                    | CTTN, HCLS1                          | 1.27 |
| BKN23565 | CG31974  | FBgn0051974 | -                                            | -                                    | 1.27 |
| BKN20715 | CG9646   | FBgn0034184 | -                                            | KIAA0930                             | 1.27 |
| BKN41568 | CG6090   | FBgn0039406 | Ribosomal protein L34a                       | RPL34                                | 1.27 |
| BKN31808 | CG12279  | FBgn0038080 | -                                            | TSTD3, TSTD1                         | 1.27 |
| BKN20756 | CG6525   | FBgn0082831 | protein partner of snf                       | SETD1B, KMT2D, ASH1L, SETD2, PHF20   | 1.27 |
| BKN28942 | CG3186   | FBgn0034967 | eukaryotic translation elongation factor 5   | EIF5A, EIF5A2, EIF5AL1               | 1.27 |
| BKN27343 | CG9023   | FBgn0015872 | Drip                                         | AQP9, AQP7, AQP1, AQP10, MIP, FAM18  | 1.27 |
| BKN28945 | CG9344   | FBgn0034564 | -                                            | LSM6                                 | 1.27 |
| BKN41716 | CG12856  | FBgn0033966 | -                                            | -                                    | 1.27 |
| BKN20849 | CG8552   | FBgn0031990 | Phosphatidic Acid Phospholipase A1           | SEC23IP, DDHD1, DDHD2                | 1.27 |
| BKN29426 | CG17521  | FBgn0024733 | Ribosomal protein L10                        | RPL10L, RPL10                        | 1.27 |
| BKN20008 | CG8745   | FBgn0036381 | -                                            | PHYKPL, ETNPPL                       | 1.27 |
| BKN28248 | CG4111   | FBgn0029785 | Ribosomal protein L35                        | RPL35                                | 1.27 |
| BKN32704 | CG1147   | FBgn0037408 | Neuropeptide F receptor                      | CH17-360D5.1, LOC105379861, NPY4R, I | 1.27 |
| BKN33377 | CG15922  | FBgn0040575 | -                                            | -                                    | 1.27 |
| BKN21681 | CG9474   | FBgn0028401 | Synaptosomal-associated protein 24kDa        | SNAP47, SNAP23, SNAP25, SNAP29       | 1.27 |
| BKN31260 | CG9283   | FBgn0036878 | Cuticular protein 76Ba                       | -                                    | 1.27 |
| BKN30570 | CG14747  | FBgn0259226 | -                                            | -                                    | 1.27 |
| BKN30371 | CG4385   | FBgn0003310 | Star                                         | -                                    | 1.27 |
| BKN29005 | CG10055  | FBgn0037482 | -                                            | SHQ1                                 | 1.27 |
| BKN34483 | HDC11104 | -           | -                                            | -                                    | 1.27 |
| BKN34049 | HDC06597 | -           | -                                            | -                                    | 1.27 |
| BKN21657 | CG6049   | FBgn0037081 | barricade                                    | HTATSF1                              | 1.27 |
| BKN42049 | CG32400  | FBgn0020644 | Lcp65Ab1                                     | -                                    | 1.27 |
| BKN25171 | CG11927  | FBgn0031638 | -                                            | -                                    | 1.27 |
| BKN31991 | CG15924  | FBgn0085428 | NADPH oxidase                                | NOX3, NOX4, NOX5, DUOX1, CYBB, DUC   | 1.27 |
| BKN46017 | CG9619   | FBgn0036862 | Glycogen binding subunit 76A                 | PPP1R3E, PPP1R3F, PPP1R3C, PPP1R3    | 1.26 |
| BKN30167 | CG11175  | FBgn0034530 | Reduction in Cnn dots 6                      | -                                    | 1.26 |
| BKN20208 | CG13570  | FBgn0015544 | spaghetti                                    | RPAP3                                | 1.26 |
| BKN31176 | CG12708  | FBgn0030666 | -                                            | -                                    | 1.26 |
| BKN22405 | CG7530   | FBgn0038256 | -                                            | PAQR3, ADIPOR1, PAQR8, ADIPOR2, PA   | 1.26 |
| BKN45023 | CG7281   | FBgn0004597 | Cyclin C                                     | CCNC                                 | 1.26 |
| BKN27388 | CG6833   | FBgn0036405 | -                                            | AEN, REXO4, ISG20, ISG20L2           | 1.26 |
| BKN42313 | CG41614  | FBgn0085721 | -                                            | -                                    | 1.26 |
| BKN27848 | CG11586  | FBgn0035520 | -                                            | ZMAT2                                | 1.26 |
| BKN40598 | CR30220  | FBgn0050220 | transfer RNA:Glutamic acid-CTC 2-2           | -                                    | 1.26 |
| BKN28611 | CG18492  | FBgn0026323 | TGF-beta activated kinase 1                  | DSTYK, RIPK3, MAP3K10, LRRK1, LRRK   | 1.26 |
| BKN22614 | CG4673   | FBgn0039348 | Nuclear protein localization 4               | NPLOC4                               | 1.26 |
| BKN30095 | CG9427   | FBgn0037721 | -                                            | IFI30                                | 1.26 |
| BKN20268 | CG12082  | FBgn0035402 | Ubiquitin specific protease 5                | USP5, USP13                          | 1.26 |
| BKN40546 | CG14464  | FBgn0033000 | -                                            | THAP7, THAP8, ARL14EP, ARL14EPL      | 1.26 |
| BKN20165 | CG11505  | FBgn0035424 | -                                            | LARP4, LARP4B                        | 1.26 |
| BKN30497 | CG3975   | FBgn0027559 | Pol32 polymerase delta subunit               | POLD3                                | 1.26 |
| BKN30542 | CG1561   | FBgn0030317 | -                                            | -                                    | 1.26 |
| BKN33114 | CG8869   | FBgn0031654 | Jonah 25Bii                                  | -                                    | 1.25 |
| BKN29432 | CG7434   | FBgn0015288 | Ribosomal protein L22                        | RPL22, RPL22L1                       | 1.25 |

|          |          |             |                                                      |                                         |      |
|----------|----------|-------------|------------------------------------------------------|-----------------------------------------|------|
| BKN32850 | CG8193   | FBgn0033367 | Prophenoloxidase 2                                   | -                                       | 1.25 |
| BKN21293 | CG4539   | FBgn0010520 | Bekka                                                | FCF1                                    | 1.25 |
| BKN22351 | CG10306  | FBgn0034654 | eukaryotic translation initiation factor 3 subunit k | EIF3K                                   | 1.25 |
| BKN20280 | CG8411   | FBgn0005695 | germ cell-less                                       | KLHL10, BTBD16, GMCL1                   | 1.25 |
| BKN31717 | CG7991   | FBgn0035260 | -                                                    | -                                       | 1.25 |
| BKN28400 | CG9884   | FBgn0011818 | out at first                                         | OAF                                     | 1.25 |
| BKN24685 | CG15227  | FBgn0034554 | -                                                    | CA5B, CA11, CA13, CA2, CA7, CA12, CA1   | 1.25 |
| BKN41812 | CG11100  | FBgn0037207 | Mesoderm-expressed 2                                 | -                                       | 1.25 |
| BKN33703 | HDC05885 | FBgn0085260 | -                                                    | -                                       | 1.25 |
| BKN29733 | CG2916   | FBgn0026361 | Septin 5                                             | SEPT7, SEPT11, SEPT14, SEPT5, SEPT2     | 1.25 |
| BKN22499 | CG5924   | FBgn0032154 | mitochondrial DNA helicase                           | POLN, TWNK                              | 1.25 |
| BKN30066 | CG33251  | FBgn0053251 | -                                                    | -                                       | 1.25 |
| BKN28534 | CG9907   | FBgn0003036 | paralytic                                            | SCN5A, CACNA1S, CACNA1A, SCN7A, S       | 1.25 |
| BKN22518 | CG12345  | FBgn0015323 | Choline acetyltransferase                            | CRAT, CPT1A, CHAT, CPT1B, CPT1C         | 1.25 |
| BKN26937 | CG12092  | FBgn0031140 | Niemann-Pick type C-1b                               | SCAP, NPC1L1, NPC1                      | 1.25 |
| BKN29191 | CG7533   | FBgn0036165 | charybde                                             | DDIT4, DDIT4L                           | 1.25 |
| BKN21384 | CG8781   | FBgn0033378 | tsunagi                                              | NCL, RBM8A                              | 1.25 |
| BKN26702 | CG31861  | FBgn0051861 | -                                                    | -                                       | 1.25 |
| BKN21655 | CG10997  | FBgn0030529 | Chloride intracellular channel                       | CLIC6, CLIC1, CLIC2, CLIC5, CLIC3, CLIC | 1.25 |
| BKN31292 | CG30269  | FBgn0050269 | -                                                    | LITAF, CDIP1                            | 1.24 |
| BKN22548 | CG8144   | FBgn0026188 | pasilla                                              | NOVA1, NOVA2                            | 1.24 |
| BKN40658 | CG12547  | FBgn0250830 | -                                                    | NHLRC2                                  | 1.24 |
| BKN23465 | CG9377   | FBgn0032507 | -                                                    | F9, F10                                 | 1.24 |
| BKN45947 | CG1374   | FBgn0003866 | teashirt                                             | TSHZ1, TSHZ3, TSHZ2                     | 1.24 |
| BKN28754 | CG7424   | FBgn0031980 | Ribosomal protein L36A                               | RPL36AL, RPL36A, RPL36A-HNRNPH2         | 1.24 |
| BKN22031 | CG5330   | FBgn0015268 | Nucleosome assembly protein 1                        | NAP1L3, NAP1L2, NAP1L4, NAP1L1, NAF     | 1.24 |
| BKN21404 | CG1882   | FBgn0033226 | -                                                    | ABHD4, ABHD5, EPHX3                     | 1.24 |
| BKN22782 | CG3297   | FBgn0002778 | minidiscs                                            | SLC7A5, SLC7A6, SLC7A13, SLC7A14, S     | 1.24 |
| BKN28802 | CG14745  | FBgn0043575 | Peptidoglycan recognition protein SC2                | PGLYRP2, PGLYRP4, PGLYRP3, PGLYR        | 1.24 |
| BKN28570 | CG4428   | FBgn0031298 | Autophagy-related 4a                                 | ATG4A, ATG4D, ATG4B, ATG4C              | 1.24 |
| BKN46607 | CG13239  | FBgn0037197 | -                                                    | -                                       | 1.24 |
| BKN29068 | CG2471   | FBgn0030357 | Sclp                                                 | LRRC20                                  | 1.24 |
| BKN26648 | CG33770  | FBgn0053770 | -                                                    | -                                       | 1.24 |
| BKN22424 | CG11301  | FBgn0034726 | Mesoderm-expressed 4                                 | NFYC, POLE4, CHRAC1                     | 1.24 |
| BKN40402 | CR42890  | FBgn0046822 | mir-3 stem loop                                      | -                                       | 1.24 |
| BKN33104 | CG3960   | FBgn0085446 | -                                                    | SMTNL1, SMTN, SMTNL2, SRRM3, SPEC       | 1.24 |
| BKN27686 | CG2701   | FBgn0024973 | -                                                    | ASCC2                                   | 1.24 |
| BKN28835 | CG4905   | FBgn0034135 | Syntrophin-like 2                                    | SNTG2, SNTG1                            | 1.24 |
| BKN25885 | CG5873   | FBgn0038511 | Curly Su                                             | EPX, LPO, TPO, PTGS2, MPO, PDXNL, P     | 1.24 |
| BKN23031 | CG10110  | FBgn0024698 | Cleavage and polyadenylation specificity factor 160  | CPSF1                                   | 1.23 |
| BKN20303 | CG8194   | FBgn0010406 | Ribonuclease X25                                     | RNASET2                                 | 1.23 |
| BKN28173 | CG12220  | FBgn0039835 | mitochondrial ribosomal protein L32                  | MRPL32                                  | 1.23 |
| BKN30923 | CG15628  | FBgn0031632 | -                                                    | GLYATL3                                 | 1.23 |
| BKN27003 | CG31367  | FBgn0051367 | -                                                    | TCERG1L, TCERG1, ARHGAP5                | 1.23 |
| BKN31143 | CG14248  | FBgn0250908 | beat-VII                                             | CADM2                                   | 1.23 |
| BKN27869 | CG8784   | FBgn0038140 | Pyrokinin 2 receptor 1                               | NTSR2, GPR39, NMUR2, GPR148, NMUF       | 1.23 |
| BKN33402 | HDC08633 | -           | -                                                    | -                                       | 1.23 |
| BKN22662 | CG2984   | FBgn0022768 | Protein phosphatase 2C                               | ILKAP, PP2D1, PPM1F, PPM1L, PPM1E,      | 1.23 |
| BKN28176 | CG7726   | FBgn0013325 | Ribosomal protein L11                                | RPL11                                   | 1.23 |
| BKN24244 | CG1866   | FBgn0039581 | Moca-cyp                                             | PPIG, RGPLD4, PPIAL4G, NKTR, RGPLD5,    | 1.23 |
| BKN22875 | CG32076  | FBgn0052076 | Alpha 3 glucosyltransferase                          | ALG10, ALG10B                           | 1.23 |
| BKN42482 | CG34439  | FBgn0085468 | NADH dehydrogenase (ubiquinone) MWFE subunit         | NDUFA1, NCAPG                           | 1.23 |
| BKN28567 | CG7902   | FBgn0004862 | bagpipe                                              | NKX2-8, NKX2-4, NKX2-5, NKX3-2, NKX2    | 1.23 |
| BKN22520 | CG6920   | FBgn0002906 | Bloom syndrome helicase                              | BLM, RECQL5, WRN, RECQL                 | 1.23 |
| BKN27510 | CG10664  | FBgn0032833 | Cytochrome c oxidase subunit 4                       | COX4I1, COX4I2                          | 1.23 |
| BKN26643 | CG30015  | FBgn0050015 | -                                                    | -                                       | 1.23 |
| BKN31213 | CG13681  | FBgn0035832 | Ectoderm-expressed 4                                 | SARM1, TMEM199                          | 1.23 |
| BKN24757 | CG32119  | FBgn0052119 | -                                                    | -                                       | 1.23 |
| BKN21643 | CG15651  | FBgn0034567 | -                                                    | FKRP                                    | 1.23 |
| BKN30056 | CG6272   | FBgn0036126 | Inverted repeat binding protein 18 kDa               | CEBPB, TEF, CEBPG, DBP, HLF, CEBPA      | 1.23 |
| BKN46656 | CG42551  | FBgn0260724 | La related protein                                   | LARP1B, LARP1                           | 1.23 |
| BKN31638 | CG31191  | FBgn0051191 | -                                                    | -                                       | 1.23 |

|          |         |             |                                      |                                      |      |
|----------|---------|-------------|--------------------------------------|--------------------------------------|------|
| BKN22441 | CG5116  | FBgn0039339 | -                                    | GTPBP6                               | 1.23 |
| BKN30101 | CG15816 | FBgn0030866 | -                                    | RASAL1, RASA1, DAB2IP, RASAL2, RAS,  | 1.23 |
| BKN46267 | CG9760  | FBgn0036259 | -                                    | -                                    | 1.23 |
| BKN40958 | CG7463  | FBgn0036504 | yellow-k                             | -                                    | 1.23 |
| BKN22544 | CG5197  | FBgn0085487 | -                                    | KLK10, KLK15, KLK9, CTSG, GZMB, KLK  | 1.23 |
| BKN33119 | CG10677 | FBgn0035596 | -                                    | -                                    | 1.23 |
| BKN26060 | CG8484  | FBgn0037751 | matotopetli                          | ZNF543, ZBTB24, ZNF331, ZNF785       | 1.23 |
| BKN29002 | CG4204  | FBgn0023212 | Elongin B                            | TCEB2                                | 1.23 |
| BKN29103 | CG17332 | FBgn0027779 | Vacuolar H[+]-ATPase SFD subunit     | ATP6V1H                              | 1.23 |
| BKN26293 | CG3618  | FBgn0037028 | -                                    | FAM234B, FAM234A                     | 1.23 |
| BKN25757 | CG13724 | FBgn0036707 | -                                    | -                                    | 1.22 |
| BKN25222 | CG31998 | FBgn0051998 | -                                    | -                                    | 1.22 |
| BKN45386 | CG18362 | FBgn0032940 | Mondo                                | MLXIPL, MLXIP                        | 1.22 |
| BKN30483 | CG9728  | FBgn0039780 | prolyl-4-hydroxylase-alpha NE1       | P4HTM, P4HA3, P4HA2, P4HA1           | 1.22 |
| BKN27078 | CG31348 | FBgn0250910 | Octopamine beta3 receptor            | TAAR8, HTR4, TAAR6, TAAR9, TAAR1, T. | 1.22 |
| BKN29739 | CG31075 | FBgn0051075 | -                                    | ALDH1A1, ALDH9A1, ALDH8A1, ALDH2, ,  | 1.22 |
| BKN28315 | CG4084  | FBgn0011297 | lethal (2) neighbor of tid           | ALG3                                 | 1.22 |
| BKN30200 | CG15582 | FBgn0046878 | Odorant-binding protein 83cd         | -                                    | 1.22 |
| BKN26408 | CG17625 | FBgn0039002 | -                                    | SASH1, INPPL1, SAMSN1, SAMD5, SAS-   | 1.22 |
| BKN24452 | CG6735  | FBgn0086690 | Pericentrin-like protein             | PCNT, AKAP9                          | 1.22 |
| BKN30544 | CG7502  | FBgn0259169 | Rho GTPase activating protein at 18B | ARHGAP29, SYDE1, RACGAP1, ARHGAF     | 1.22 |
| BKN22059 | CG12325 | FBgn0033557 | -                                    | LOC102724159, PWP2                   | 1.22 |
| BKN27863 | CG12740 | FBgn0035422 | Ribosomal protein L28                | RPL28                                | 1.22 |
| BKN41376 | CG12491 | FBgn0034900 | -                                    | -                                    | 1.22 |
